# Supplementary material for: The Modification of Plant Cell Wall Polysaccharides in Potato Plants during Pectobacterium atrosepticum-Caused Infection
Source: Plants (Basel). 2021 Jul 9;10(7):1407. doi: 10.3390/plants10071407 (PMC8309280; doi:10.3390/plants10071407)
Supplement: Supplementary file 1 [file plants-10-01407-s001.zip]

Archive with 5 entries (5 files):
- Supplementary Table S4.xls
- Supplementary Table S3.xls
- Supplementary Table S2.xls
- Supplementary Table S1.xls
- Supplementary Figures S1-S3.pdf
