# Supplementary material for: The Modification of Plant Cell Wall Polysaccharides in Potato Plants during Pectobacterium atrosepticum-Caused Infection
Source: Plants (Basel). 2021 Jul 9;10(7):1407. doi: 10.3390/plants10071407 (PMC8309280; doi:10.3390/plants10071407)
Supplement: Supplementary file 1 [file plants-10-01407-s001.zip › Supplementary Table S1.xls]

## Sheet: Table S1
Table S1A. The fluorescence intesity values (conv. units) calculated with ImageJ software.
The median values plus-minus 1.5 interquartile range (IQR) are given; n -- number of areas on which the pixel intensities were recognized and calculated after the subtraction of background signal.
Jim5
	Parenchyma			Collenchyma			Xylem
	Control	Asymptomatic	Necrotic	Control	Asymptomatic	Necrotic	Control	Asymptomatic	Necrotic
n	18	26	4	24	29	2	22	25	5
Median±1.5*IQR	2.18±2.66	4.58±2.34	0.52±0.26	5.35±5.78	6.19±3.75	0.22±0.23	4.48±3.21	4.6±4.58	0.37±1.07
Jim7
	Parenchyma			Collenchyma			Xylem
	Control	Asymptomatic	Necrotic	Control	Asymptomatic	Necrotic	Control	Asymptomatic	Necrotic
n	30	34	4	27	28	2	19	24	5
Median±1.5*IQR	2.7±2.34	2.66±1.77	0.58±0.15	5.69±1.68	6.89±2.28	0.25±0.15	2.64±1.77	2.58±1.68	0.54±0.15
INRA-RU2
	Parenchyma			Collenchyma			Xylem
	Control	Asymptomatic	Necrotic	Control	Asymptomatic	Necrotic	Control	Asymptomatic	Necrotic
n	24	25	2	26	25	2	25	16	4
Median±1.5*IQR	2.12±0.75	1.81±1.04	2.01±0.33	5.79±2.6	5.52±4.43	2.6±1.82	5.41±2.04	6.46±4.2	4.79±1.88
LM11
	Parenchyma			Collenchyma			Xylem
	Control	Asymptomatic	Necrotic	Control	Asymptomatic	Necrotic	Control	Asymptomatic	Necrotic
n	24	24	25	14	22	4	25	25	17
Median±1.5*IQR	1.65±1.25	2.34±1.89	1.73±0.92	0.79±0.48	0.85±0.57	0.97±2.79	9.52±4.91	15.65±3.78	13.33±6.6
LM15
	Parenchyma			Collenchyma			Xylem
	Control	Asymptomatic	Necrotic	Control	Asymptomatic	Necrotic	Control	Asymptomatic	Necrotic
n	28	29	24	33	30	29	22	25	22
Median±1.5*IQR	1.02±1.1	1.98±1.38	1.56±1.02	6.19±2.72	5.8±7.37	6.99±3.62	1.13±1.16	3.75±3.15	4.52±1.47
Table S1B. The results of comparison of the fluorescence intensity between the experimental sample types. Comparisons are made with Mann-Whitney two-sided test, critical alpha value is 0.01
Tag	Comparison	Parenchyma, p-value	Collenchyma, p-value	Xylem, p-value
JIM5	Asymptomatic zone vs Control	0.0001	0.00187602	0.6673
JIM5	Necrotic zone vs Control	0.00177	0.0001	0.002
JIM5	Asymptomatic zone vs Necrotic zone	1e-05	0.0001	0.0016
JIM7	Asymptomatic zone vs Control	0.899	0.016	0.636162
JIM7	Necrotic zone vs Control	0	0.0001	0.0001
JIM7	Asymptomatic zone vs Necrotic zone	1e-05	0.0001	0.0001
INRA-RU2	Asymptomatic zone vs Control	0.043378	0.332	0.137
INRA-RU2	Necrotic zone vs Control	5e-05	0.001	0.375
INRA-RU2	Asymptomatic zone vs Necrotic zone	0.007	0.001	0.286
LM11	Asymptomatic zone vs Control	0.012	0.2598	0.0001
LM11	Necrotic zone vs Control	0.74903	1	0.0502
LM11	Asymptomatic zone vs Necrotic zone	0.013	1	0.017
LM15	Asymptomatic zone vs Control	0.0001	0.767	0.0001
LM15	Necrotic zone vs Control	0.01415	0.118	0.0001
LM15	Asymptomatic zone vs Necrotic zone	0.011	0.48404	0.0298
