# Supplementary material for: The Modification of Plant Cell Wall Polysaccharides in Potato Plants during Pectobacterium atrosepticum-Caused Infection
Source: Plants (Basel). 2021 Jul 9;10(7):1407. doi: 10.3390/plants10071407 (PMC8309280; doi:10.3390/plants10071407)
Supplement: Supplementary file 1 [file plants-10-01407-s001.zip › Supplementary Table S2.xls]

## Sheet: Table S2
Supercategory	Category	Potato PGSC gene ID	Potato PGSC protein ID	Relative gene expression in Below necrotic zone vs Control, log2FC	Absolute gene expression in Below necrotic zone, mean TPM	Absolute gene expression in Control, mean TPM	Potato PGSC gene product annotation	RefSeq annotation of similar tobacco protein (found by BLAST)	RefSeq protein ID of similar tobacco protein (found by BLAST)	BLAST e-value
Callose degradation	Beta-1,3-glucosidases	PGSC0003DMG400012702	PGSC0003DMP400022509	6.854	27.811	0.224	Glucan endo-1,3-beta-D-glucosidase	glucan endo-1,3-beta-glucosidase, acidic	XP_016495818.1	0
Callose degradation	Beta-1,3-glucosidases	PGSC0003DMG401010492	PGSC0003DMP400018564	5.101	18.913	0.668	Acidic class II 1,3-beta-glucanase	glucan endo-1,3-beta-glucosidase, acidic	XP_016437252.1	3e-158
Callose degradation	Beta-1,3-glucosidases	PGSC0003DMG402010492	PGSC0003DMP400018565	4.565	35.536	1.892	Acidic class II 1,3-beta-glucanase	glucan endo-1,3-beta-glucosidase, acidic	XP_016437252.1	0
Callose degradation	Beta-1,3-glucosidases	PGSC0003DMG400029830	PGSC0003DMP400051976	3.694	153.044	16.304	Glucan endo-1,3-beta-D-glucosidase	glucan endo-1,3-beta-glucosidase, acidic-like	XP_016439292.1	0
Callose degradation	Beta-1,3-glucosidases	PGSC0003DMG400008368	PGSC0003DMP400014691	2.106	2.926	0.606	Beta-1,3-glucanase, acidic	glucan endo-1,3-beta-glucosidase 8-like	XP_016450467.1	0
Callose degradation	Beta-1,3-glucosidases	PGSC0003DMG400012940	PGSC0003DMP400022914	1.139	13.302	8.798	Beta-1,3-glucanase, acidic	glucan endo-1,3-beta-glucosidase 8-like	XP_016475447.1	0
Callose degradation	Beta-1,3-glucosidases	PGSC0003DMG401012862	PGSC0003DMP400022782	-5.342	0.386	17.392	Elicitor inducible beta-1,3-glucanase NtEIG-E76	glucan endo-1,3-beta-glucosidase 13-like	XP_016483130.1	0
Callose synthesis	Callose synthases	PGSC0003DMG400018343	PGSC0003DMP400031964	1.218	36.77	27.201	Transferase, transferring glycosyl groups	callose synthase 12-like	XP_016492463.1	0
Callose synthesis	Callose synthases	PGSC0003DMG400029691	PGSC0003DMP400051720	-1.179	3.023	11.476	Transferase, transferring glycosyl groups	callose synthase 11-like	XP_016499989.1	0
Callose synthesis	Callose synthases	PGSC0003DMG400028981	PGSC0003DMP400050499	-1.913	10.382	51.062	Transferase, transferring glycosyl groups	callose synthase 2-like	XP_016455135.1	0
Callose synthesis	Callose synthases	PGSC0003DMG400032202	PGSC0003DMP400055406	-2.408	6.592	47.742	Callose synthase 3	callose synthase 3-like	XP_016485996.1	0
Callose synthesis	Callose synthases	PGSC0003DMG400013578	PGSC0003DMP400024035	-2.415	0.273	1.216	Putative callose synthase	pentatricopeptide repeat-containing protein At4g11690-like	XP_016468267.1	0
Callose synthesis	Callose synthases	PGSC0003DMG400013218	PGSC0003DMP400023379	-4.001	0.23	5.21	Transferase, transferring glycosyl groups	putative callose synthase 8 isoform X2	XP_016457082.1	0
Callose synthesis	Callose synthases	PGSC0003DMG402007052	PGSC0003DMP400012502	-4.176	0.234	4.061	Transferase, transferring glycosyl groups	putative callose synthase 8	XP_016446262.1	1e-120
Callose synthesis	Callose synthases	PGSC0003DMG401007052	PGSC0003DMP400012501	-4.27	0.225	4.468	Callose synthase 8	putative callose synthase 8 isoform X1	XP_016457080.1	0
Callose synthesis	PDCB proteins	PGSC0003DMG400017797	PGSC0003DMP400031092	-1.466	7.158	23.587	Hydrolase, hydrolyzing O-glycosyl compounds	PLASMODESMATA CALLOSE-BINDING PROTEIN 3-like	XP_016494698.1	6e-51
Callose synthesis	PDCB proteins	PGSC0003DMG401009389	PGSC0003DMP400016593	-1.549	5.24	18.213	Hydrolase, hydrolyzing O-glycosyl compounds	PLASMODESMATA CALLOSE-BINDING PROTEIN 5-like	XP_016510024.1	1e-56
Callose synthesis	PDCB proteins	PGSC0003DMG400028376	PGSC0003DMP400049353	-1.878	10.59	58.773	Hydrolase, hydrolyzing O-glycosyl compounds	PLASMODESMATA CALLOSE-BINDING PROTEIN 3-like	XP_016494324.1	2e-77
Callose synthesis	PDCB proteins	PGSC0003DMG400024642	PGSC0003DMP400042653	-9.127	0.135	92.174	Glucan endo-1,3-beta-glucosidase 3	PLASMODESMATA CALLOSE-BINDING PROTEIN 3-like	XP_016447757.1	5e-90
Callose synthesis	PDCB proteins	PGSC0003DMG400001211	PGSC0003DMP400002205	-9.763	0.121	17.818	Hydrolase, hydrolyzing O-glycosyl compounds	PLASMODESMATA CALLOSE-BINDING PROTEIN 3-like	XP_016443544.1	2e-73
Cellulose synthesis	CESAs (primary wall)	PGSC0003DMG400020783	PGSC0003DMP400036122	-2.078	74.182	428.718	Cellulose synthase A catalytic subunit 6 [UDP-forming]	cellulose synthase A catalytic subunit 1 [UDP-forming]	XP_016473391.1	0
Cellulose synthesis	CESAs (primary wall)	PGSC0003DMG400006799	PGSC0003DMP400012046	-2.161	68.752	434.506	Cellulose synthase	cellulose synthase A catalytic subunit 3 [UDP-forming]-like	XP_016445983.1	0
Cellulose synthesis	CESAs (secondary wall)	PGSC0003DMG400006660	PGSC0003DMP400011771	-6.157	4.256	394.135	Cellulose synthase catalytic subunit	cellulose synthase A catalytic subunit 2 [UDP-forming]-like	XP_016485123.1	0
Cellulose synthesis	CESAs (secondary wall)	PGSC0003DMG400003822	PGSC0003DMP400006805	-7.343	2.859	451.066	Cellulose synthase	cellulose synthase A catalytic subunit 4 [UDP-forming] isoform X2	XP_016502291.1	0
Cellulose synthesis	CESAs (secondary wall)	PGSC0003DMG400028426	PGSC0003DMP400049456	-7.773	2.282	449.258	Cellulose synthase catalytic subunit	cellulose synthase A catalytic subunit 8 [UDP-forming]-like	XP_016511297.1	0
Cellulose synthesis	CESAs (secondary wall)	PGSC0003DMG400011148	PGSC0003DMP400019690	-9.095	1.3	640.884	Cellulose synthase 3	cellulose synthase A catalytic subunit 7 [UDP-forming]-like isoform X2	XP_016486305.1	0
Cellulose synthesis	COBRA	PGSC0003DMG400014428	PGSC0003DMP400025423	2.605	1.063	0.227	Protein COBRA	COBRA-like protein 10	XP_016512322.1	0
Cellulose synthesis	COBRA	PGSC0003DMG400001371	PGSC0003DMP400002471	-3.197	0.927	10.664	Protein COBRA	protein COBRA-like	XP_016487395.1	0
Cellulose synthesis	COBRA	PGSC0003DMG400001465	PGSC0003DMP400002658	-5.374	0.299	31.913	Protein COBRA	COBRA-like protein 4 isoform X1	XP_016486487.1	0
Cellulose synthesis	COBRA	PGSC0003DMG400001031	PGSC0003DMP400001940	-9.141	0	32.412	Protein COBRA	COBRA-like protein 4	XP_016509309.1	0
Cellulose synthesis	COBRA	PGSC0003DMG400024530	PGSC0003DMP400042439	-9.235	0.971	456.721	Protein COBRA	COBRA-like protein 4	XP_016488065.1	0
CLG degradation	Endoglucanases	PGSC0003DMG400022208	PGSC0003DMP400038445	7.115	30.03	0.263	Endo-1,4-beta-glucanase	endoglucanase 11-like	XP_016507968.1	0
CLG degradation	Endoglucanases	PGSC0003DMG400016169	PGSC0003DMP400028249	6.619	15.333	0.274	Endo-1,4-beta-glucanase	endoglucanase 12-like	XP_016437253.1	0
CLG degradation	Endoglucanases	PGSC0003DMG402004358	PGSC0003DMP400007753	2.842	20.934	2.709	Endo-1,3-1,4-beta-d-glucanase	endo-1,3;1,4-beta-D-glucanase-like	XP_016512372.1	2e-153
CLG degradation	Endoglucanases	PGSC0003DMG400039856	PGSC0003DMP400061960	2.499	19.083	4.017	Beta-glucan-elicitor receptor	probable endo-1,3(4)-beta-glucanase ARB_01444	XP_016486628.1	0
CLG degradation	Endoglucanases	PGSC0003DMG400018224	PGSC0003DMP400031750	-1.652	35.764	159.168	Endo-1,4-beta-glucanase	endoglucanase 25-like	XP_016470648.1	0
CLG degradation	Endoglucanases	PGSC0003DMG402003636	PGSC0003DMP400006502	-2.552	0.537	4.955	Endo-1,4-beta-glucanase	endoglucanase 2-like	XP_016450461.1	0
CLG degradation	Endoglucanases	PGSC0003DMG400030225	PGSC0003DMP400052615	-2.567	0.506	3.574	Endo-beta-1,4-D-glucanase	endoglucanase 6-like	XP_016493227.1	3e-119
CLG degradation	Endoglucanases	PGSC0003DMG400003124	PGSC0003DMP400005642	-3.253	0.372	5.188	Endo-1,4-beta-glucanase	endoglucanase 24-like	XP_016475811.1	0
CLG degradation	Endoglucanases	PGSC0003DMG400003774	PGSC0003DMP400006740	-4.468	3.332	102.25	Endo-1,4-beta-glucanase	endoglucanase 2-like	XP_016500571.1	0
CLG degradation	Endoglucanases	PGSC0003DMG400012183	PGSC0003DMP400021534	-4.76	0.727	30.877	Endo-1,4-beta-glucanase	endoglucanase 18-like	XP_016483101.1	0
CLG degradation	Endoglucanases	PGSC0003DMG400031792	PGSC0003DMP400055022	-4.959	0.09	0.841	Endo-1,4-beta-glucanase	endoglucanase 17-like	XP_016486862.1	0
CLG degradation	Endoglucanases	PGSC0003DMG401000668	PGSC0003DMP400001315	-5.904	0	1.666	Glycosyl hydrolase family 9	endoglucanase 11-like	XP_016483392.1	0
CLG degradation	Endoglucanases	PGSC0003DMG400012288	PGSC0003DMP400021750	-6.148	1.027	83.289	Endo-beta-1,4-D-glucanase	endoglucanase 6-like	XP_016493227.1	0
CLG degradation	Endoglucanases	PGSC0003DMG400004992	PGSC0003DMP400008898	-6.673	0.089	11.256	Endo-beta-1,4-glucanase	endoglucanase 6-like	XP_016444846.1	0
CLG degradation	Endoglucanases	PGSC0003DMG400013523	PGSC0003DMP400023924	-6.857	4.878	748.144	Endo-1,4-beta-glucanase	endoglucanase 25-like	XP_016491788.1	0
CLG degradation	Endoglucanases	PGSC0003DMG400008938	PGSC0003DMP400015724	-7.527	0.112	41.93	Endo-1,4-beta-glucanase	endoglucanase 8-like	XP_016448941.1	0
CLG degradation	Endoglucanases	PGSC0003DMG400008413	PGSC0003DMP400014770	-7.724	0.504	54.733	Endo-1,4-beta-D-glucanase	endoglucanase 9-like	XP_016467406.1	0
CLG degradation	Glucosidases	PGSC0003DMG400027520	PGSC0003DMP400047848	-1.501	2.936	6.288	Periplasmic beta-glucosidase	beta-glucosidase BoGH3B-like	XP_016504470.1	0
CLG degradation	Glucosidases	PGSC0003DMG400003013	PGSC0003DMP400005427	-2.456	4.37	47.43	Beta-D-glucan exohydrolase	beta-glucosidase BoGH3B-like	XP_016501003.1	0
CLG degradation	Mannosidases	PGSC0003DMG400013146	PGSC0003DMP400023267	-2.723	6.608	33.419	Endo-beta-mannanase	mannan endo-1,4-beta-mannosidase 2-like	XP_016487549.1	0
CLG degradation	Mannosidases	PGSC0003DMG400018338	PGSC0003DMP400031957	-3.267	5.432	35.769	Endo-beta-mannanase	mannan endo-1,4-beta-mannosidase 2-like	XP_016469865.1	0
CLG degradation	Mannosidases	PGSC0003DMG400003521	PGSC0003DMP400006274	-5.991	0.194	12.431	Endo-beta-mannanase	mannan endo-1,4-beta-mannosidase 7-like	XP_016443967.1	0
CLG degradation	Mannosidases	PGSC0003DMG400031221	PGSC0003DMP400054405	-6.433	3.149	483.41	Hydrolase, hydrolyzing O-glycosyl compounds	mannan endo-1,4-beta-mannosidase 6-like isoform X2	XP_016455491.1	0
CLG degradation	XTH	PGSC0003DMG400031101	PGSC0003DMP400054168	3.48	87.836	8.343	Xyloglucan endotransglycosylase	xyloglucan endotransglucosylase/hydrolase 2-like	XP_016457864.1	0
CLG degradation	XTH	PGSC0003DMG400017299	PGSC0003DMP400030226	2.229	88.12	19.994	Xyloglucan endotransglycosylase	xyloglucan endotransglucosylase/hydrolase 2-like	XP_016457864.1	0
CLG degradation	XTH	PGSC0003DMG400002309	PGSC0003DMP400004123	2	4.702	1.174	Xyloglucan endo-transglycosylase	xyloglucan endotransglucosylase/hydrolase 2-like	XP_016457864.1	5e-127
CLG degradation	XTH	PGSC0003DMG400021877	PGSC0003DMP400037893	-2.074	9.927	6.274	Xyloglucan endo-transglycosylase	xyloglucan endotransglucosylase/hydrolase 2-like	XP_016453928.1	0
CLG degradation	XTH	PGSC0003DMG400007854	PGSC0003DMP400013842	-2.163	0.683	2.646	Xyloglucan endotransglucosylase-hydrolase XTH9	xyloglucan endotransglucosylase/hydrolase 2-like	XP_016466378.1	0
CLG degradation	XTH	PGSC0003DMG400022791	PGSC0003DMP400039518	-2.896	2.805	14.166	Xyloglucan endotransglucosylase/hydrolase 13	probable xyloglucan endotransglucosylase/hydrolase protein 28	XP_016489964.1	0
CLG degradation	XTH	PGSC0003DMG400026189	PGSC0003DMP400045445	-4.38	16.73	116.88	Xyloglucan endotransglycosylase/hydrolase 16 protein	xyloglucan endotransglucosylase/hydrolase protein 9-like	XP_016478975.1	0
CLG degradation	XTH	PGSC0003DMG400007794	PGSC0003DMP400013723	-4.893	0.058	2.188	Xyloglucan endotransglucosylase-hydrolase XTH9	xyloglucan endotransglucosylase/hydrolase 2-like	XP_016466378.1	0
CLG degradation	XTH	PGSC0003DMG400024755	PGSC0003DMP400042888	-6.067	6.137	475.13	Xyloglucan endotransglucosylase/hydrolase 1	probable xyloglucan endotransglucosylase/hydrolase protein	XP_016442808.1	0
CLG degradation	XTH	PGSC0003DMG400021398	PGSC0003DMP400037085	-6.568	0.452	30.838	Xyloglucan endotransglucosylase-hydrolase XTH7	probable xyloglucan endotransglucosylase/hydrolase protein 7	XP_016501246.1	0
CLG degradation	XTH	PGSC0003DMG400003866	PGSC0003DMP400006870	-6.585	0.13	9	Xyloglucan endotransglucosylase/hydrolase 12	probable xyloglucan endotransglucosylase/hydrolase protein 32	XP_016484875.1	0
CLG degradation	XTH	PGSC0003DMG400004109	PGSC0003DMP400007341	-7.26	0.618	1.458	Xyloglucan endotransglycosylase hydrolase	probable xyloglucan endotransglucosylase/hydrolase protein 33	XP_016466905.1	0
CLG degradation	XTH	PGSC0003DMG400000408	PGSC0003DMP400000796	-7.702	0.178	49.172	Xyloglucan endotransglucosylase-hydrolase XTH6	xyloglucan endotransglucosylase/hydrolase protein 31-like	XP_016498521.1	0
CLG degradation	Xylosidases/xylanases	PGSC0003DMG402011539	PGSC0003DMP400020474	1.006	20.244	14.648	Xylanase Xyn1	uncharacterized protein LOC107814145 isoform X2	XP_016494973.1	0
CLG degradation	Xylosidases/xylanases	PGSC0003DMG400014540	PGSC0003DMP400025612	-2.598	2.247	14.601	Alpha-glucosidase	alpha-xylosidase 1-like	XP_016446448.1	0
CLG degradation	Xylosidases/xylanases	PGSC0003DMG400015881	PGSC0003DMP400027836	-4.88	0.029	1.375	Alpha-glucosidase	alpha-xylosidase 1-like	XP_016496324.1	0
CLG degradation	Xylosidases/xylanases	PGSC0003DMG400008420	PGSC0003DMP400014780	-5.139	0.024	3.171	Endo-1,4-beta-xylanase A	exoglucanase/xylanase-like	XP_016491067.1	0
CLG degradation	Xylosidases/xylanases	PGSC0003DMG400009484	PGSC0003DMP400016778	-5.292	1.639	57.095	Periplasmic beta-glucosidase	probable beta-D-xylosidase 7	XP_016469137.1	0
CLG degradation	Xylosidases/xylanases	PGSC0003DMG400029738	PGSC0003DMP400051807	-5.774	0.986	56.466	LEXYL2 protein	beta-xylosidase/alpha-L-arabinofuranosidase 2-like	XP_016513596.1	0
CLG degradation	Xylosidases/xylanases	PGSC0003DMG400004955	PGSC0003DMP400008830	-6.125	1.257	165.893	Xylanase Xyn2	endo-1,4-beta-xylanase A-like	XP_016441624.1	0
CLG degradation	Xylosidases/xylanases	PGSC0003DMG401009485	PGSC0003DMP400016779	-7.731	0	0.728	Periplasmic beta-glucosidase	probable beta-D-xylosidase 7	XP_016444820.1	0
CLG degradation	Xylosidases/xylanases	PGSC0003DMG400009036	PGSC0003DMP400015895	-7.853	0.037	16.608	Beta-glucosidase	probable beta-D-xylosidase 2	XP_016458273.1	0
CLG degradation	Xylosidases/xylanases	PGSC0003DMG402009485	PGSC0003DMP400016780	-10.112	0	3.754	Periplasmic beta-glucosidase	probable beta-D-xylosidase 7	XP_016444820.1	0
CLG synthesis	CSL	PGSC0003DMG400012852	PGSC0003DMP400022763	7.736	22.699	0.331	Cellulose synthase CslG	cellulose synthase-like protein G3	XP_016476186.1	0
CLG synthesis	CSL	PGSC0003DMG400011752	PGSC0003DMP400020836	5.204	1.655	0.048	Cellulose synthase	cellulose synthase-like protein G2	XP_016454863.1	0
CLG synthesis	CSL	PGSC0003DMG400013398	PGSC0003DMP400023709	3.456	20.395	2.582	Cellulose synthase	cellulose synthase-like protein G2	XP_016465828.1	0
CLG synthesis	CSL	PGSC0003DMG400010049	PGSC0003DMP400017778	1.836	184.906	31.605	Transferase, transferring glycosyl groups	xyloglucan glycosyltransferase 4-like	XP_016498929.1	0
CLG synthesis	CSL	PGSC0003DMG400029792	PGSC0003DMP400051900	1.704	16.593	5.133	Cellulose synthase CslE	cellulose synthase-like protein E6	XP_016464798.1	0
CLG synthesis	CSL	PGSC0003DMG402022167	PGSC0003DMP400038334	1.128	43.219	22.79	Cellulose synthase	cellulose synthase-like protein E1	XP_016482925.1	0
CLG synthesis	CSL	PGSC0003DMG400045075	PGSC0003DMP400067179	-1.69	2.009	10.192	Xyloglucan glycosyltransferase 6	probable xyloglucan glycosyltransferase 6	XP_016489917.1	0
CLG synthesis	CSL	PGSC0003DMG400002722	PGSC0003DMP400004895	-3.029	0.316	5.92	Cellulose synthase-like A1	glucomannan 4-beta-mannosyltransferase 9-like	XP_016469749.1	0
CLG synthesis	CSL	PGSC0003DMG401003156	PGSC0003DMP400005705	-3.077	13.034	83.756	Glycosyltransferase, CAZy family GT2	cellulose synthase-like protein D3	XP_016485100.1	0
CLG synthesis	CSL	PGSC0003DMG400007150	PGSC0003DMP400012679	-3.237	0.573	5.137	UPA15	glucomannan 4-beta-mannosyltransferase 2-like	XP_016450698.1	0
CLG synthesis	CSL	PGSC0003DMG400004943	PGSC0003DMP400008796	-4.27	2.078	29.877	Transferase, transferring glycosyl groups	probable xyloglucan glycosyltransferase 12	XP_016468590.1	0
CLG synthesis	CSL	PGSC0003DMG400009536	PGSC0003DMP400016846	-5.253	0.341	9.355	Transferase, transferring glycosyl groups	probable xyloglucan glycosyltransferase 5	XP_016493803.1	0
CLG synthesis	CSL	PGSC0003DMG400026523	PGSC0003DMP400046084	-5.602	1.102	90.285	UPA15	glucomannan 4-beta-mannosyltransferase 2-like	XP_016470073.1	0
CLG synthesis	CSL	PGSC0003DMG400028267	PGSC0003DMP400049143	-6.932	0.529	68.913	Cellulose synthase-like A1	glucomannan 4-beta-mannosyltransferase 9-like	XP_016505665.1	0
CLG synthesis	CSL	PGSC0003DMG400031800	PGSC0003DMP400055037	-7.705	0.043	4.234	Cellulose synthase A catalytic subunit 3 [UDP-forming]	cellulose synthase-like protein D5	XP_016457601.1	0
CLG synthesis	Exostosin family	PGSC0003DMG400003358	PGSC0003DMP400006014	8.53	63.402	0.157	Exostosin	probable glycosyltransferase At5g03795	XP_016432990.1	0
CLG synthesis	Exostosin family	PGSC0003DMG400015688	PGSC0003DMP400027521	3.168	43.799	6.592	Glycosyltransferase	probable glycosyltransferase At3g07620	XP_016476946.1	0
CLG synthesis	Exostosin family	PGSC0003DMG400017704	PGSC0003DMP400030935	2.582	4.852	0.518	EXO	probable glycosyltransferase At5g03795 isoform X2	XP_016499668.1	0
CLG synthesis	Exostosin family	PGSC0003DMG400002237	PGSC0003DMP400003995	1.301	16.195	7.185	Exostosin family protein	probable glycosyltransferase At3g07620	XP_016486995.1	0
CLG synthesis	Exostosin family	PGSC0003DMG400001769	PGSC0003DMP400003161	-6.259	0.277	8.457	Beta-1,3-glucuronyltransferase	probable beta-1,4-xylosyltransferase IRX9	XP_016438769.1	0
CLG synthesis	Exostosin family	PGSC0003DMG400029899	PGSC0003DMP400052083	-7.169	0	4.102	Glycosyltransferase	probable glycosyltransferase At5g25310	XP_016481166.1	0
CLG synthesis	Exostosin family	PGSC0003DMG400021437	PGSC0003DMP400037152	-8.953	0.023	27.097	Gene of unknown function	putative glycosyltransferase 7	XP_016449186.1	0
CLG synthesis	Exostosin family (IRX19-like)	PGSC0003DMG400025579	PGSC0003DMP400044342	-6.025	3.261	288.067	Conserved gene of unknown function	probable beta-1,4-xylosyltransferase IRX10L	XP_016433595.1	0
CLG synthesis	Exostosin family (IRX7-like)	PGSC0003DMG400019789	PGSC0003DMP400034383	1.958	23.494	8.453	Exostosin family protein	uncharacterized protein LOC107785408	XP_016462201.1	0	0
CLG synthesis	Exostosin family (IRX7-like)	PGSC0003DMG400024814	PGSC0003DMP400043002	-2.093	2.222	15.964	Exostosin family protein	probable glucuronoxylan glucuronosyltransferase F8H	XP_016464300.1	0
CLG synthesis	Exostosin family (MUR3-like)	PGSC0003DMG400008579	PGSC0003DMP400015074	1.084	26.732	18.158	Glycosyltransferase, CAZy family GT47	xyloglucan galactosyltransferase MUR3-like	XP_016515345.1	0
CLG synthesis	Exostosin family (XLT2-like)	PGSC0003DMG400031015	PGSC0003DMP400054016	3.891	8.846	0.896	Xyloglucan galactosyltransferase KATAMARI1	xyloglucan galactosyltransferase XLT2	XP_016515520.1	0
CLG synthesis	Exostosin family (XLT2-like)	PGSC0003DMG400006432	PGSC0003DMP400011408	-1.052	8.309	22.85	Xyloglucan galactosyltransferase KATAMARI1	xyloglucan galactosyltransferase XLT2-like	XP_016474663.1	0
CLG synthesis	Exostosin family (XLT2-like)	PGSC0003DMG400024950	PGSC0003DMP400043287	-2.147	6.345	48.725	Xyloglucan galactosyltransferase KATAMARI1	xyloglucan galactosyltransferase XLT2-like	XP_016459366.1	0
CLG synthesis	Galactosyltransferases	PGSC0003DMG400035299	PGSC0003DMP400057403	1.49	2.346	1.077	Alpha-6-galactosyltransferase	glycosyltransferase 6-like	XP_016449177.1	0
CLG synthesis	Galactosyltransferases	PGSC0003DMG400009930	PGSC0003DMP400017533	-4.608	0.273	12.276	Conserved gene of unknown function	galactan beta-1,4-galactosyltransferase GALS1-like	XP_016505312.1	0
CLG synthesis	Galactosyltransferases	PGSC0003DMG400013632	PGSC0003DMP400024112	-5.152	1.303	46.475	Conserved gene of unknown function	galactan beta-1,4-galactosyltransferase GALS3-like	XP_016480620.1	0
CLG synthesis	Galactosyltransferases	PGSC0003DMG400011286	PGSC0003DMP400019987	-7.997	0.109	12.769	Conserved gene of unknown function	galactan beta-1,4-galactosyltransferase GALS3-like	XP_016493382.1	0
CLG synthesis	Xylan acetylation (TBL22-like)	PGSC0003DMG401026555	PGSC0003DMP400046148	3.581	33.702	2.79	Conserved gene of unknown function	protein trichome birefringence-like 19	XP_016447673.1	0
CLG synthesis	Xylan acetylation (TBL22-like)	PGSC0003DMG400027890	PGSC0003DMP400048499	1.208	17.553	9.177	Conserved gene of unknown function	protein trichome birefringence-like 14	XP_016435293.1	0
CLG synthesis	Xylan acetylation (TBL29/ESK1-like)	PGSC0003DMG400024237	PGSC0003DMP400041932	-6.488	0.189	10.115	Conserved gene of unknown function	protein ESKIMO 1-like	XP_016471721.1	0
CLG synthesis	Xylan acetylation (TBL29/ESK1-like)	PGSC0003DMG400027728	PGSC0003DMP400048220	-12.973	0.08	51.821	Conserved gene of unknown function	protein ESKIMO 1-like	XP_016451753.1	0
CLG synthesis	Xylan acetylation (TBL33-like)	PGSC0003DMG400023940	PGSC0003DMP400041384	-7.506	0.526	59.305	Conserved gene of unknown function	protein trichome birefringence-like 33	XP_016493559.1	0
CLG synthesis	Xylan acetylation (TBL34-like)	PGSC0003DMG401001531	PGSC0003DMP400002762	5.524	168.836	3.079	Conserved gene of unknown function	protein trichome birefringence-like 34	XP_016504204.1	0
CLG synthesis	Xylan acetylation (TBL34-like)	PGSC0003DMG400006497	PGSC0003DMP400011515	-5.606	0.101	6.604	Conserved gene of unknown function	protein trichome birefringence-like 34	XP_016491276.1	3e-169
CLG synthesis	Xylan acetylation (TBL3-like)	PGSC0003DMG401004451	PGSC0003DMP400007904	-10.005	0.084	7.673	Conserved gene of unknown function	protein trichome birefringence-like 3	XP_016474242.1	0
CLG synthesis	Xylan backbone	PGSC0003DMG400013327	PGSC0003DMP400023573	-2.125	26.895	140.19	Glycosyltransferase	probable beta-1,4-xylosyltransferase IRX14	XP_016475171.1	0
CLG synthesis	Xylan backbone	PGSC0003DMG400001769	PGSC0003DMP400003161	-6.259	0.277	8.457	Beta-1,3-glucuronyltransferase	probable beta-1,4-xylosyltransferase IRX9	XP_016438769.1	0
CLG synthesis	Xylan sidechain (MUCI21-like)	PGSC0003DMG400028330	PGSC0003DMP400049265	8.102	105.305	0.128	Transferase, transferring glycosyl groups	uncharacterized protein LOC107802989	XP_016482066.1	0
CLG synthesis	Xylan sidechain (MUCI21-like)	PGSC0003DMG400023731	PGSC0003DMP400041067	6.242	148.793	1.488	Glycosyltransferase	uncharacterized protein LOC107776472	XP_016451860.1	0
CLG synthesis	Xylan sidechain (MUCI21-like)	PGSC0003DMG400027288	PGSC0003DMP400047471	5.053	92.448	2.205	Glycosyltransferase	EGF domain-specific O-linked N-acetylglucosamine transferase-like	XP_016510367.1	0
CLG synthesis	Xyloglucan xylosyl side chain (XXT-like)	PGSC0003DMG400016008	PGSC0003DMP400028012	-1.395	1.437	4.297	Glycosyltransferase	probable xyloglucan 6-xylosyltransferase 3	XP_016478584.1	0
Polygalacturonic acid degradation	Acetylesterases	PGSC0003DMG402024140	PGSC0003DMP400041746	4.978	639.687	31.722	PAE	pectin acetylesterase 8-like	XP_016486013.1	5e-155
Polygalacturonic acid degradation	Acetylesterases	PGSC0003DMG401024140	PGSC0003DMP400041742	1.059	394.604	275.438	PAE	pectin acetylesterase 8-like	XP_016442057.1	0
Polygalacturonic acid degradation	Acetylesterases	PGSC0003DMG400031385	PGSC0003DMP400054670	-2.772	0.529	2.839	Pectin acetylesterase	pectin acetylesterase 12-like isoform X1	XP_016508968.1	0
Polygalacturonic acid degradation	Acetylesterases	PGSC0003DMG400018236	PGSC0003DMP400031771	-4.011	1.184	25.694	Pectinacetylesterase	pectin acetylesterase 12-like isoform X1	XP_016481028.1	0
Polygalacturonic acid degradation	Glucuronidases	PGSC0003DMG400011026	PGSC0003DMP400019475	1.734	21.683	4.122	Heparanase	heparanase-like protein 3	XP_016494546.1	0
Polygalacturonic acid degradation	Glucuronidases	PGSC0003DMG400030715	PGSC0003DMP400053498	-7.426	0.34	15.181	Heparanase	heparanase-like protein 3	XP_016511107.1	0
Polygalacturonic acid degradation	Methylesterase inhibitor	PGSC0003DMG400010815	PGSC0003DMP400019111	7.323	13.082	0.144	PME inhibitor	21 kDa protein-like	XP_016508511.1	3e-127
Polygalacturonic acid degradation	Methylesterase inhibitor	PGSC0003DMG400012020	PGSC0003DMP400021265	4.248	367.157	20.769	Pectin methlyesterase inhibitor protein 1	21 kDa protein-like	XP_016496335.1	1e-119
Polygalacturonic acid degradation	Methylesterase inhibitor	PGSC0003DMG400028048	PGSC0003DMP400048734	2.634	11.43	1.959	Pectin methylesterase inhibitor isoform	21 kDa protein-like	XP_016511972.1	2e-116
Polygalacturonic acid degradation	Methylesterase inhibitor	PGSC0003DMG400031816	PGSC0003DMP400055069	-1.904	0.337	2.464	Pectinesterase	probable pectinesterase/pectinesterase inhibitor 41	XP_016434647.1	0
Polygalacturonic acid degradation	Methylesterase inhibitor	PGSC0003DMG400031344	PGSC0003DMP400054598	-2.082	3.032	16.086	Pectinesterase-2	probable pectinesterase/pectinesterase inhibitor 51	XP_016451245.1	0
Polygalacturonic acid degradation	Methylesterase inhibitor	PGSC0003DMG400010814	PGSC0003DMP400019108	-2.095	0.281	1.873	Conserved gene of unknown function	21 kDa protein-like	XP_016514981.1	5e-77
Polygalacturonic acid degradation	Methylesterase inhibitor	PGSC0003DMG400009081	PGSC0003DMP400015990	-2.153	10.195	81.868	Pectin methylesterase 1	probable pectinesterase/pectinesterase inhibitor 61	XP_016489051.1	0
Polygalacturonic acid degradation	Methylesterase inhibitor	PGSC0003DMG400028674	PGSC0003DMP400049953	-2.761	0.917	7.676	Pectinesterase-2	probable pectinesterase/pectinesterase inhibitor 51	XP_016438798.1	0
Polygalacturonic acid degradation	Methylesterase inhibitor	PGSC0003DMG400021575	PGSC0003DMP400037407	-3.115	0.173	2.49	Pectinesterase	probable pectinesterase/pectinesterase inhibitor 33	XP_016465371.1	0
Polygalacturonic acid degradation	Methylesterase inhibitor	PGSC0003DMG400004735	PGSC0003DMP400008395	-3.117	2.884	55.418	Conserved gene of unknown function	21 kDa protein-like	XP_016488278.1	6e-117
Polygalacturonic acid degradation	Methylesterase inhibitor	PGSC0003DMG400028675	PGSC0003DMP400049954	-4.294	1.388	38.503	Pectinesterase-2	probable pectinesterase/pectinesterase inhibitor 51	XP_016451245.1	0
Polygalacturonic acid degradation	Methylesterase inhibitor	PGSC0003DMG400019611	PGSC0003DMP400034073	-7.287	0.861	199.52	Pectin methylesterase 1	probable pectinesterase/pectinesterase inhibitor 34	XP_016496306.1	0
Polygalacturonic acid degradation	Methylesterase inhibitor	PGSC0003DMG400019123	PGSC0003DMP400033225	-9.857	0.164	188.837	Pectinesterase inhibitor	21 kDa protein-like	XP_016442823.1	1e-112
Polygalacturonic acid degradation	Methylesterases	PGSC0003DMG400009177	PGSC0003DMP400016181	1.658	12.441	4.363	Pectinesterase 3	pectinesterase 3-like	XP_016466184.1	0
Polygalacturonic acid degradation	Methylesterases	PGSC0003DMG400018145	PGSC0003DMP400031616	-1.178	15.581	54.553	Enzyme inhibitor	pectinesterase 1-like	XP_016436893.1	3e-133
Polygalacturonic acid degradation	Methylesterases	PGSC0003DMG400002085	PGSC0003DMP400003743	-3.367	13.192	72.567	Pectinesterase	pectinesterase-like isoform X1	XP_016462163.1	0
Polygalacturonic acid degradation	Methylesterases	PGSC0003DMG400025967	PGSC0003DMP400045032	-4.851	9.748	559.667	Pectinesterase	pectinesterase 2-like	XP_016471127.1	0
Polygalacturonic acid degradation	Methylesterases	PGSC0003DMG400031791	PGSC0003DMP400055021	-5.251	0.052	4.618	Pectinesterase	pectinesterase-like	XP_016486864.1	0
Polygalacturonic acid degradation	Methylesterases	PGSC0003DMG402017934	PGSC0003DMP400031280	-6.108	0.065	2.992	Pectinesterase	pectinesterase-like	XP_016458739.1	0
Polygalacturonic acid degradation	Methylesterases	PGSC0003DMG400011746	PGSC0003DMP400020825	-6.87	0	16.584	Pectinesterase	probable pectinesterase 8 isoform X1	XP_016449486.1	2e-141
Polygalacturonic acid degradation	Methylesterases	PGSC0003DMG400001844	PGSC0003DMP400003302	-8.415	0	6.249	Invertase inhibitor	putative invertase inhibitor	XP_016437069.1	2e-108
Polygalacturonic acid degradation	Methylesterases	PGSC0003DMG400005206	PGSC0003DMP400009251	-9.239	0.027	23.234	Pectinesterase	probable pectinesterase 53	XP_016471940.1	0
Polygalacturonic acid degradation	Polygalacturonan lyases	PGSC0003DMG400004325	PGSC0003DMP400007689	-2.833	0.617	5.735	Gene of unknown function	probable pectate lyase 5 isoform X1	XP_016507376.1	2e-168
Polygalacturonic acid degradation	Polygalacturonan lyases	PGSC0003DMG400010771	PGSC0003DMP400019050	-5.572	0.103	6.321	Pectate lyase	probable pectate lyase 5	XP_016484486.1	0
Polygalacturonic acid degradation	Polygalacturonan lyases	PGSC0003DMG400012640	PGSC0003DMP400022394	-6.066	0.358	17.765	Pectate lyase P18	probable pectate lyase P18	XP_016477301.1	0
Polygalacturonic acid degradation	Polygalacturonan lyases	PGSC0003DMG400015815	PGSC0003DMP400027737	-7.175	0.066	11.606	Pectase lyase	probable pectate lyase 8	XP_016505210.1	0
Polygalacturonic acid degradation	Polygalacturonan lyases	PGSC0003DMG400015230	PGSC0003DMP400026712	-8.851	0.195	80.682	Pectate lyase	probable pectate lyase 18	XP_016438872.1	0
Polygalacturonic acid degradation	Polygalacturonan lyases	PGSC0003DMG400003871	PGSC0003DMP400006877	-9.206	0	4.023	Pectate lyase	probable pectate lyase 12	XP_016462638.1	0
Polygalacturonic acid degradation	Polygalacturonan lyases	PGSC0003DMG400020156	PGSC0003DMP400034980	-9.343	0.134	4.046	Pectase lyase	probable pectate lyase 8	XP_016491388.1	0
Polygalacturonic acid degradation	Polygalacturonan lyases	PGSC0003DMG400029645	PGSC0003DMP400051648	-10.142	0.565	597.26	Pectase lyase	probable pectate lyase 8	XP_016510897.1	0
Polygalacturonic acid degradation	Polygalacturonan lyases	PGSC0003DMG400027070	PGSC0003DMP400047017	-10.231	0	8.756	Pectate lyase	probable pectate lyase 18	XP_016438872.1	0
Polygalacturonic acid degradation	Polygalacturonase inhibitor-like	PGSC0003DMG401022197	PGSC0003DMP400038422	3.308	66.516	8.972	Polygalacturonase inhibitor protein	polygalacturonase inhibitor-like	XP_016506424.1	0
Polygalacturonic acid degradation	Polygalacturonase inhibitor-like	PGSC0003DMG400009178	PGSC0003DMP400016183	-1.178	17.792	48.475	Pectinesterase	pectinesterase/pectinesterase inhibitor U1	XP_016466186.1	0
Polygalacturonic acid degradation	Polygalacturonase inhibitor-like	PGSC0003DMG400015933	PGSC0003DMP400027914	-1.964	1.249	3.717	Pectinesterase PPE8B	pectinesterase/pectinesterase inhibitor PPE8B-like	XP_016505800.1	0
Polygalacturonic acid degradation	Polygalacturonases	PGSC0003DMG400030994	PGSC0003DMP400053986	4.752	100.285	1.709	Polygalacturonase-1 non-catalytic subunit beta	polygalacturonase-1 non-catalytic subunit beta-like	XP_016501888.1	0
Polygalacturonic acid degradation	Polygalacturonases	PGSC0003DMG400027019	PGSC0003DMP400046917	4.602	14.629	0.658	Polygalacturonase-1 non-catalytic subunit beta	polygalacturonase 1 beta-like protein 3	XP_016496229.1	3e-41
Polygalacturonic acid degradation	Polygalacturonases	PGSC0003DMG400022104	PGSC0003DMP400038206	3.41	15.335	1.721	Polygalacturonase	probable polygalacturonase At3g15720 isoform X2	XP_016445679.1	0
Polygalacturonic acid degradation	Polygalacturonases	PGSC0003DMG400014216	PGSC0003DMP400025011	-1.242	2.822	7.172	Polygalacturonase	probable polygalacturonase	XP_016475522.1	0
Polygalacturonic acid degradation	Polygalacturonases	PGSC0003DMG400002931	PGSC0003DMP400005283	-1.346	22.154	82.991	Polygalacturonase	probable polygalacturonase	XP_016496762.1	0
Polygalacturonic acid degradation	Polygalacturonases	PGSC0003DMG400000608	PGSC0003DMP400001219	-1.364	2.731	9.929	Polygalacturonase	probable polygalacturonase At1g80170	XP_016454253.1	0
Polygalacturonic acid degradation	Polygalacturonases	PGSC0003DMG400011767	PGSC0003DMP400020856	-1.666	1.516	5.015	Polygalacturonase	probable polygalacturonase	XP_016513232.1	0
Polygalacturonic acid degradation	Polygalacturonases	PGSC0003DMG400021630	PGSC0003DMP400037509	-3.014	0.643	5.913	Polygalacturonase	probable polygalacturonase At1g80170	XP_016466674.1	0
Polygalacturonic acid degradation	Polygalacturonases	PGSC0003DMG400007306	PGSC0003DMP400012939	-3.407	0.566	9.572	Polygalacturonase	probable polygalacturonase	XP_016438282.1	0
Polygalacturonic acid degradation	Polygalacturonases	PGSC0003DMG400031797	PGSC0003DMP400055030	-3.757	5.381	88.061	Polygalacturonase	probable polygalacturonase	XP_016492396.1	0
Polygalacturonic acid degradation	Polygalacturonases	PGSC0003DMG400016038	PGSC0003DMP400028050	-3.797	3.789	65.629	Polygalacturonase	probable polygalacturonase	XP_016476447.1	3e-108
Polygalacturonic acid degradation	Polygalacturonases	PGSC0003DMG400021658	PGSC0003DMP400037552	-4.612	0.309	11.874	Polygalacturonase	probable polygalacturonase isoform X2	XP_016506687.1	0
Polygalacturonic acid degradation	Polygalacturonases	PGSC0003DMG403031436	PGSC0003DMP400054735	-4.999	0.621	17.616	Polygalacturonase	probable polygalacturonase At1g80170	XP_016501118.1	0
Polygalacturonic acid degradation	Polygalacturonases	PGSC0003DMG400030978	PGSC0003DMP400053954	-5.161	0.4	16.196	Polygalacturonase non-catalytic subunit AroGP2	polygalacturonase-1 non-catalytic subunit beta-like	XP_016444012.1	0
Polygalacturonic acid degradation	Polygalacturonases	PGSC0003DMG400030981	PGSC0003DMP400053959	-5.235	0.696	15.627	Polygalacturonase non-catalytic subunit AroGP3	polygalacturonase-1 non-catalytic subunit beta-like	XP_016444012.1	0
Polygalacturonic acid degradation	Polygalacturonases	PGSC0003DMG400030979	PGSC0003DMP400053955	-5.713	0.631	32.389	Polygalacturonase non-catalytic subunit AroGP3	polygalacturonase-1 non-catalytic subunit beta-like	XP_016444012.1	0
Polygalacturonic acid degradation	Polygalacturonases	PGSC0003DMG400030980	PGSC0003DMP400053958	-5.803	0.45	25.75	Polygalacturonase non-catalytic subunit AroGP3	polygalacturonase-1 non-catalytic subunit beta-like	XP_016444012.1	3e-75
Polygalacturonic acid degradation	Polygalacturonases	PGSC0003DMG400024599	PGSC0003DMP400042576	-10.651	0	10.93	Polygalacturonase-1 non-catalytic subunit beta	polygalacturonase 1 beta-like protein 3	XP_016496229.1	0
Polygalacturonic acid synthesis	Galacturonosyltransferase	PGSC0003DMG400001444	PGSC0003DMP400002614	1.845	56.135	17.895	Isoform 2 of Probable galacturonosyltransferase 13	probable galacturonosyltransferase 14	XP_016452889.1	0
Polygalacturonic acid synthesis	Galacturonosyltransferase	PGSC0003DMG400014677	PGSC0003DMP400025858	1.643	15.471	6.726	Glycosyltransferase QUASIMODO1	probable galacturonosyltransferase 3	XP_016451803.1	0
Polygalacturonic acid synthesis	Galacturonosyltransferase	PGSC0003DMG400024824	PGSC0003DMP400043026	1.42	21.443	11.339	Glycosyltransferase, CAZy family GT8	probable galacturonosyltransferase 10	XP_016469039.1	0
Polygalacturonic acid synthesis	Galacturonosyltransferase	PGSC0003DMG400004427	PGSC0003DMP400007869	1.264	6.608	3.527	Glycosyltransferase QUASIMODO1	probable galacturonosyltransferase 13 isoform X1	XP_016489958.1	0
Polygalacturonic acid synthesis	Galacturonosyltransferase	PGSC0003DMG400020103	PGSC0003DMP400034871	-1.263	37.364	109.458	Glycosyltransferase QUASIMODO1	galacturonosyltransferase 8-like	XP_016485625.1	0
Polygalacturonic acid synthesis	Galacturonosyltransferase	PGSC0003DMG400027227	PGSC0003DMP400047316	-1.863	10.138	54.729	Glycosyltransferase, CAZy family GT8	probable galacturonosyltransferase 4 isoform X1	XP_016452928.1	0
Polygalacturonic acid synthesis	Galacturonosyltransferase	PGSC0003DMG400016880	PGSC0003DMP400029494	-2.978	10.954	131.141	Gene of unknown function	probable galacturonosyltransferase-like 1	XP_016446790.1	0
Polygalacturonic acid synthesis	Galacturonosyltransferase	PGSC0003DMG400017341	PGSC0003DMP400030305	-3.176	2.579	42.409	Glycosyltransferase QUASIMODO1	probable galacturonosyltransferase 15 isoform X1	XP_016471036.1	0
Polygalacturonic acid synthesis	Galacturonosyltransferase	PGSC0003DMG400031840	PGSC0003DMP400055118	-4.544	3.936	135.153	Glycosyltransferase, CAZy family GT8	probable galacturonosyltransferase-like 7	XP_016445931.1	0
Polygalacturonic acid synthesis	Galacturonosyltransferase	PGSC0003DMG400010088	PGSC0003DMP400017881	-4.646	0.205	5.371	Glycosyltransferase family GT8 protein	probable galacturonosyltransferase-like 1	XP_016446109.1	0
Polygalacturonic acid synthesis	Galacturonosyltransferase	PGSC0003DMG400000827	PGSC0003DMP400001574	-5.658	0.533	39.612	Glycosyltransferase, CAZy family GT8	probable galacturonosyltransferase-like 3 isoform X2	XP_016465760.1	0
Polygalacturonic acid synthesis	Galacturonosyltransferase	PGSC0003DMG400014401	PGSC0003DMP400025360	-6.259	0.362	70.668	Glycosyltransferase, CAZy family GT8	probable galacturonosyltransferase 12	XP_016487243.1	0
Polygalacturonic acid synthesis	Galacturonosyltransferase	PGSC0003DMG400019228	PGSC0003DMP400033406	-6.687	0.428	28.242	Glycosyltransferase, CAZy family GT8	probable galacturonosyltransferase 12	XP_016515911.1	0
Polygalacturonic acid synthesis	Galacturonosyltransferase	PGSC0003DMG400001183	PGSC0003DMP400002168	-12.137	0	50.781	Glycosyltransferase family GT8 protein	probable galacturonosyltransferase-like 1	XP_016496817.1	0
Rhamnogalacturonan degradation	Beta-galactosidases	PGSC0003DMG400008109	PGSC0003DMP400014264	-1.548	6.486	24.621	Beta-galactosidase	beta-galactosidase 8-like	XP_016478752.1	0
Rhamnogalacturonan degradation	Beta-galactosidases	PGSC0003DMG400002590	PGSC0003DMP400004621	-1.632	65.454	456.928	Beta-galactosidase	beta-galactosidase-like	XP_016436867.1	0
Rhamnogalacturonan degradation	Beta-galactosidases	PGSC0003DMG400033646	PGSC0003DMP400056147	-1.853	8.34	31.768	Beta-galactosidase	beta-galactosidase	XP_016468781.1	0
Rhamnogalacturonan degradation	Beta-galactosidases	PGSC0003DMG400026430	PGSC0003DMP400045895	-2.323	7.562	51.656	Beta-galactosidase	beta-galactosidase 9-like isoform X1	XP_016458095.1	0
Rhamnogalacturonan degradation	Beta-galactosidases	PGSC0003DMG400004842	PGSC0003DMP400008591	-2.818	0.574	6.037	Beta-galactosidase	beta-galactosidase-like	XP_016465757.1	0
Rhamnogalacturonan degradation	Beta-galactosidases	PGSC0003DMG400004496	PGSC0003DMP400007964	-4.371	0.204	3.198	Beta-galactosidase	beta-galactosidase-like	XP_016479426.1	0
Rhamnogalacturonan degradation	Beta-galactosidases	PGSC0003DMG400030954	PGSC0003DMP400053911	-4.558	3.608	150.803	Beta-galactosidase	beta-galactosidase 3-like	XP_016511053.1	0
Rhamnogalacturonan degradation	Beta-galactosidases	PGSC0003DMG402009228	PGSC0003DMP400016280	-5.051	0.102	3.487	Beta-galactosidase	beta-galactosidase 16-like	XP_016434263.1	0
Rhamnogalacturonan degradation	Beta-galactosidases	PGSC0003DMG400022365	PGSC0003DMP400038759	-6.486	0.064	3.139	Beta-galactosidase	beta-galactosidase 8-like	XP_016511915.1	0
Rhamnogalacturonan degradation	Beta-galactosidases	PGSC0003DMG400003537	PGSC0003DMP400006312	-7.46	0.589	140.602	Beta-galactosidase	beta-galactosidase 3-like	XP_016446878.1	0
Rhamnogalacturonan degradation	Rhamnogalacturonate lyases	PGSC0003DMG400014600	PGSC0003DMP400025712	8.134	161.99	0.369	Lyase	rhamnogalacturonate lyase B-like	XP_016433647.1	0
Rhamnogalacturonan degradation	Rhamnogalacturonate lyases	PGSC0003DMG401002053	PGSC0003DMP400003672	2.483	22.172	3.593	Lyase	probable rhamnogalacturonate lyase B isoform X1	XP_016486072.1	0
Rhamnogalacturonan degradation	Rhamnogalacturonate lyases	PGSC0003DMG400009330	PGSC0003DMP400016476	-4.154	0.243	6.38	Lyase	probable rhamnogalacturonate lyase B isoform X1	XP_016453916.1	0
Rhamnogalacturonan synthesis	RG-I acetylation (TBL10-like)	PGSC0003DMG400023668	PGSC0003DMP400040943	-2.445	0.555	1.317	Trichome birefringence	protein trichome birefringence-like	XP_016484877.1	0
Rhamnogalacturonan synthesis	RG-I acetylation (TBL10-like)	PGSC0003DMG400013492	PGSC0003DMP400023859	-4.596	0.332	3.268	Lustrin A	protein trichome birefringence-like 2	XP_016433624.1	0
Rhamnogalacturonan synthesis	RG-I acetylation (TBL10-like)	PGSC0003DMG400008990	PGSC0003DMP400015811	-6.571	0.042	3.078	Conserved gene of unknown function	protein trichome birefringence-like 10	XP_016491849.1	0
Rhamnogalacturonan synthesis	RG-I rhamnosyltransferase-like	PGSC0003DMG400002367	PGSC0003DMP400004223	-1.133	3.588	6.538	Conserved gene of unknown function	O-fucosyltransferase family protein [RRT1 AT5G15740.1-like]	XP_016473343,1	0
Rhamnogalacturonan synthesis	RG-I side chains (ARAD1-like)	PGSC0003DMG400028213	PGSC0003DMP400049039	1.295	4.718	0.926	Exostosin family protein	probable arabinosyltransferase ARAD1	XP_016439772.1	0
Rhamnogalacturonan synthesis	RG-I side chains (ARAD1-like)	PGSC0003DMG400019532	PGSC0003DMP400033940	-1.063	3.061	8.068	Conserved gene of unknown function	probable arabinosyltransferase ARAD1	XP_016473203.1	0
Wall proteins	Arabinogalactan proteins	PGSC0003DMG400002364	PGSC0003DMP400004216	4.022	6.09	0.47	Hydroxyproline-rich glycoprotein (HRGP)	non-classical arabinogalactan protein 31-like	XP_016500500.1	5e-82
Wall proteins	Arabinogalactan proteins	PGSC0003DMG400017758	PGSC0003DMP400031035	3.912	177.133	17.518	Arabinogalactan-protein	classical arabinogalactan protein 5-like	XP_016496013.1	1e-38
Wall proteins	Arabinogalactan proteins	PGSC0003DMG400017756	PGSC0003DMP400031033	2.327	48.709	13.081	Arabinogalactan-protein	classical arabinogalactan protein 5-like	XP_016496013.1	5e-39
Wall proteins	Arabinogalactan proteins	PGSC0003DMG400030411	PGSC0003DMP400052929	-1.943	7.006	42.553	Fasciclin-like arabinogalactan protein 9	fasciclin-like arabinogalactan protein 4	XP_016436757.1	0
Wall proteins	Arabinogalactan proteins	PGSC0003DMG400018093	PGSC0003DMP400031527	-3.079	3.296	44.626	Fasciclin-like arabinogalactan protein 9	fasciclin-like arabinogalactan protein 4	XP_016433499.1	0
Wall proteins	Arabinogalactan proteins	PGSC0003DMG400032211	PGSC0003DMP400055423	-3.571	13.56	168.712	Conserved gene of unknown function	arabinogalactan peptide 14-like	XP_016436771.1	9e-11
Wall proteins	Arabinogalactan proteins	PGSC0003DMG400029811	PGSC0003DMP400051939	-4.274	1.046	17.87	Fasciclin-like arabinogalactan protein 10	fasciclin-like arabinogalactan protein 1	XP_016512217.1	7e-127
Wall proteins	Arabinogalactan proteins	PGSC0003DMG400009400	PGSC0003DMP400016620	-4.447	2.19	69.41	Fasciclin-like arabinogalactan protein 1	fasciclin-like arabinogalactan protein 9	XP_016460579.1	5e-134
Wall proteins	Arabinogalactan proteins	PGSC0003DMG400028137	PGSC0003DMP400048888	-4.713	11.55	311.808	Fasciclin-like arabinogalactan protein 14	fasciclin-like arabinogalactan protein 17	XP_016515538.1	0
Wall proteins	Arabinogalactan proteins	PGSC0003DMG400021372	PGSC0003DMP400037047	-4.807	3.827	118.477	Fasciclin-like arabinogalactan protein 14	fasciclin-like arabinogalactan protein 17	XP_016506029.1	0
Wall proteins	Arabinogalactan proteins	PGSC0003DMG400006160	PGSC0003DMP400010929	-6.381	1.462	203.543	Fasciclin-like arabinogalactan protein 2	fasciclin-like arabinogalactan protein 7	XP_016487929.1	2e-147
Wall proteins	Arabinogalactan proteins	PGSC0003DMG400014408	PGSC0003DMP400025379	-7.015	0.838	87.395	Fasciclin-like arabinogalactan protein 10	fasciclin-like arabinogalactan protein 1	XP_016497487.1	0
Wall proteins	Arabinogalactan proteins	PGSC0003DMG400008063	PGSC0003DMP400014191	-7.032	1.534	132.153	Fasciclin-like AGP 13	fasciclin-like arabinogalactan protein 11	XP_016493656.1	2e-125
Wall proteins	Arabinogalactan proteins	PGSC0003DMG400025104	PGSC0003DMP400043555	-7.112	0.96	118.617	AGP19 (ARABINOGALACTAN-PROTEIN 19)	lysine-rich arabinogalactan protein 19-like	XP_016481069.1	3e-05
Wall proteins	Arabinogalactan proteins	PGSC0003DMG400024948	PGSC0003DMP400043286	-7.43	2.166	320.581	Arabinogalactan protein	lysine-rich arabinogalactan protein 18-like	XP_016479528.1	3e-30
Wall proteins	Arabinogalactan proteins	PGSC0003DMG400026224	PGSC0003DMP400045517	-7.723	0.098	56.354	Methionine rich arabinogalactan	classical arabinogalactan protein 9-like	XP_016500242.1	4e-19
Wall proteins	Arabinogalactan proteins	PGSC0003DMG400017376	PGSC0003DMP400030347	-8.393	0.465	247.072	Fasciclin-like arabinogalactan protein 19	fasciclin-like arabinogalactan protein 2	XP_016455308.1	0
Wall proteins	Arabinogalactan proteins	PGSC0003DMG400028821	PGSC0003DMP400050207	-8.768	0	7.062	Fasciclin-like AGP 12	fasciclin-like arabinogalactan protein 7	XP_016487929.1	1e-95
Wall proteins	Arabinogalactan proteins	PGSC0003DMG400012749	PGSC0003DMP400022582	-8.771	1.018	308.718	Fasciclin-like arabinogalactan protein 13	fasciclin-like arabinogalactan protein 8	XP_016477809.1	0
Wall proteins	Arabinogalactan proteins	PGSC0003DMG400001754	PGSC0003DMP400003139	-9.077	0.351	118.198	Arabinogalactan protein 3	fasciclin-like arabinogalactan protein 12	XP_016454027.1	6e-120
Wall proteins	Arabinogalactan proteins	PGSC0003DMG400025757	PGSC0003DMP400044607	-9.393	0.096	143.107	Proline-rich cell wall protein	lysine-rich arabinogalactan protein 18-like	XP_016441136.1	0.0002
Wall proteins	Arabinogalactan proteins	PGSC0003DMG400041435	PGSC0003DMP400063539	-9.557	0.816	263.197	Arabinogalactan protein	fasciclin-like arabinogalactan protein 12	XP_016445284.1	1e-108
Wall proteins	Arabinogalactan proteins	PGSC0003DMG400003371	PGSC0003DMP400006033	-9.681	1.566	689.203	Arabinogalactan protein 2	fasciclin-like arabinogalactan protein 11	XP_016448178.1	1e-134
Wall proteins	Arabinogalactan proteins	PGSC0003DMG400029700	PGSC0003DMP400051734	-11.675	0.035	176.367	Proline-rich protein 1	non-classical arabinogalactan protein 31-like	XP_016435997.1	1e-93
Wall proteins	Arabinogalactan proteins	PGSC0003DMG400009783	PGSC0003DMP400017274	-13.586	0.078	153.363	Proline-rich cell wall protein	classical arabinogalactan protein 9-like	XP_016482121.1	0.0003
Wall proteins	BURP	PGSC0003DMG400019937	PGSC0003DMP400034606	7.582	60.386	0.25	Dehydration-responsive protein RD22	BURP domain-containing protein 5-like	XP_016506479.1	0
Wall proteins	BURP	PGSC0003DMG400025193	PGSC0003DMP400043742	-2.416	12.622	52.288	Dehydration-responsive protein RD22	BURP domain protein USPL1-like	XP_016441387.1	6e-129
Wall proteins	BURP	PGSC0003DMG400047074	PGSC0003DMP400069178	-3.171	21.802	396.385	BURP domain-containing protein	BURP domain-containing protein 5-like	XP_016506479.1	4e-102
Wall proteins	BURP	PGSC0003DMG400014509	PGSC0003DMP400025570	-4.017	4.535	74.423	BURP domain-containing protein	BURP domain protein RD22-like	XP_016497544.1	0
Wall proteins	BURP	PGSC0003DMG400025191	PGSC0003DMP400043740	-9.268	0.077	8.557	Dehydration-responsive protein RD22	BURP domain protein USPL1-like	XP_016485139.1	8e-160
Wall proteins	Chitinases	PGSC0003DMG400001528	PGSC0003DMP400002757	6.132	1541.35	15.38	Class II chitinase	acidic endochitinase P	XP_016446027.1	3e-136
Wall proteins	Chitinases	PGSC0003DMG400025063	PGSC0003DMP400043485	5.847	519.832	5.637	Class IV chitinase	endochitinase EP3-like	XP_016479741.1	9e-172
Wall proteins	Chitinases	PGSC0003DMG400026855	PGSC0003DMP400046624	5.308	6163.4	258.399	Endochitinase 4	endochitinase B	XP_016509308.1	0
Wall proteins	Chitinases	PGSC0003DMG400011842	PGSC0003DMP400021005	4.757	237.236	14.8	Chitinase	acidic mammalian chitinase-like	XP_016493482.1	0
Wall proteins	Chitinases	PGSC0003DMG400008796	PGSC0003DMP400015454	4.297	565.438	48.757	Basic 30 kDa endochitinase	endochitinase B	XP_016509308.1	2e-173
Wall proteins	Chitinases	PGSC0003DMG400026853	PGSC0003DMP400046622	4.125	706.043	70.698	Endochitinase 3	endochitinase B	XP_016509308.1	6e-161
Wall proteins	Chitinases	PGSC0003DMG400008797	PGSC0003DMP400015455	1.24	228.396	149.011	Endochitinase	endochitinase B	XP_016509308.1	8e-131
Wall proteins	Chitinases	PGSC0003DMG400033882	PGSC0003DMP400056271	-2.303	16.53	108.899	Acidic endochitinase	acidic endochitinase	XP_016507940.1	0
Wall proteins	Chitinases	PGSC0003DMG400004593	PGSC0003DMP400008119	-3.917	0.685	13.203	Chitinase	chitinase-like protein 2	XP_016500498.1	0
Wall proteins	Chitinases	PGSC0003DMG400021602	PGSC0003DMP400037450	-4.26	94.26	2756.32	Chitinase	chitinase-like protein 1	XP_016497971.1	0
Wall proteins	Chitinases	PGSC0003DMG400016302	PGSC0003DMP400028482	-4.511	0.27	6.775	Class IV chitinase	chitinase 6-like	XP_016434218.1	1e-148
Wall proteins	Chitinases	PGSC0003DMG402001531	PGSC0003DMP400002766	-7.644	1.121	111.128	Chitinase 134	basic endochitinase-like	XP_016504206.1	2e-173
Wall proteins	Expansins	PGSC0003DMG400020497	PGSC0003DMP400035606	8.49	250.945	0.497	Major pollen allergen Ory s 1	expansin-like B1	XP_016458239.1	2e-168
Wall proteins	Expansins	PGSC0003DMG400026222	PGSC0003DMP400045515	8.402	503.85	2.462	Major pollen allergen Ory s 1	expansin-like B1	XP_016515821.1	7e-158
Wall proteins	Expansins	PGSC0003DMG400022732	PGSC0003DMP400039412	7.339	3.54	0	Alpha-expansin 7	expansin-A7-like	XP_016500148.1	4e-162
Wall proteins	Expansins	PGSC0003DMG400011229	PGSC0003DMP400019869	3.41	41.674	5.384	Gene of unknown function	expansin-A1-like	XP_016452402.1	0.41
Wall proteins	Expansins	PGSC0003DMG400026220	PGSC0003DMP400045512	3.003	73.184	5.985	Major pollen allergen Ory s 1	expansin-like B1	XP_016467794.1	1e-164
Wall proteins	Expansins	PGSC0003DMG400001848	PGSC0003DMP400003309	2.817	7.287	0.827	Major pollen allergen Ory s 1	expansin-like B1	XP_016455911.1	4e-179
Wall proteins	Expansins	PGSC0003DMG400018635	PGSC0003DMP400032465	-1.269	67.738	165.01	Expansin	expansin-like A2	XP_016480531.1	2e-161
Wall proteins	Expansins	PGSC0003DMG400016715	PGSC0003DMP400029232	-3.403	2.198	21.493	Expansin	expansin-A13-like	XP_016448830.1	1e-179
Wall proteins	Expansins	PGSC0003DMG400008833	PGSC0003DMP400015511	-3.763	3.142	50.716	Expansin	expansin-A3-like	XP_016493682.1	3e-177
Wall proteins	Expansins	PGSC0003DMG400024062	PGSC0003DMP400041627	-3.822	1.669	13.949	Expansin	expansin-A13-like	XP_016490918.1	5e-171
Wall proteins	Expansins	PGSC0003DMG400018431	PGSC0003DMP400032109	-4.015	0.764	9.779	Alpha-expansin 1	expansin-A1-like	XP_016488701.1	6e-159
Wall proteins	Expansins	PGSC0003DMG400001426	PGSC0003DMP400002572	-4.183	1.188	22.438	Expansin	expansin-A10-like	XP_016484237.1	6e-159
Wall proteins	Expansins	PGSC0003DMG400023815	PGSC0003DMP400041197	-4.394	3.226	83.259	Expansin	expansin-A4-like	XP_016488258.1	6e-177
Wall proteins	Expansins	PGSC0003DMG400018312	PGSC0003DMP400031910	-8.024	0.043	14.878	Beta-expansin 3	expansin-B3-like	XP_016497079.1	0
Wall proteins	Expansins	PGSC0003DMG400016650	PGSC0003DMP400029123	-8.278	0.131	21.326	Expansin	expansin-A10-like	XP_016484048.1	5e-150
Wall proteins	Expansins	PGSC0003DMG400030415	PGSC0003DMP400052934	-9.022	0.122	31.793	Expansin18	expansin-A6-like	XP_016498182.1	1e-169
Wall proteins	Expansins	PGSC0003DMG400004404	PGSC0003DMP400007815	-10.013	0.209	115.75	Expansin9	expansin-A6-like	XP_016498182.1	3e-173
Wall proteins	Expansins	PGSC0003DMG400018844	PGSC0003DMP400032846	-10.093	0	22.476	Beta expansin 2	expansin-B15-like	XP_016434629.1	8e-119
Wall proteins	Extensins	PGSC0003DMG400005783	PGSC0003DMP400010255	8.288	116.773	0.369	Plant cell wall protein SlTFR88	uncharacterized protein LOC107778437	XP_016454179.1	2e-96
Wall proteins	Extensins	PGSC0003DMG400002456	PGSC0003DMP400004343	7.459	654.18	3.841	Cysteine-rich extensin-2	uncharacterized protein LOC107776177	XP_016451512.1	1e-97
Wall proteins	Extensins	PGSC0003DMG400000783	PGSC0003DMP400001497	4.155	738.019	63.368	Extensin	extensin-2-like	XP_016478884.1	3e-21
Wall proteins	Extensins	PGSC0003DMG400000776	PGSC0003DMP400001489	3.888	310.841	35.694	Extensin (ext)	extensin-3-like	XP_016465382.1	4e-26
Wall proteins	Extensins	PGSC0003DMG400000777	PGSC0003DMP400001490	2.799	4.178	1.787	Histidine-rich glycoprotein	extensin-3-like	XP_016465382.1	1e-18
Wall proteins	Extensins	PGSC0003DMG400021603	PGSC0003DMP400037451	2.202	427.824	133.136	Hydroxyproline-rich glycoprotein (HRGP)	extensin-3-like	XP_016463892.1	8e-94
Wall proteins	Extensins	PGSC0003DMG400000063	PGSC0003DMP400000153	1.824	129.034	37.942	Heavy metal-associated domain containing protein	pollen-specific leucine-rich repeat extensin-like protein 1	XP_016435780.1	1e-55
Wall proteins	Extensins	PGSC0003DMG400015010	PGSC0003DMP400026400	1.783	486.829	205.401	Proline-rich protein	pollen-specific leucine-rich repeat extensin-like protein 1	XP_016447112.1	7e-104
Wall proteins	Extensins	PGSC0003DMG400026790	PGSC0003DMP400046535	1.369	16.406	6.114	Conserved gene of unknown function	pollen-specific leucine-rich repeat extensin-like protein 1	XP_016504384.1	0
Wall proteins	Extensins	PGSC0003DMG400030541	PGSC0003DMP400053159	1.186	213.979	110.058	Nutrient reservoir	leucine-rich repeat extensin-like protein 6	XP_016479141.1	8e-38
Wall proteins	Extensins	PGSC0003DMG400001072	PGSC0003DMP400002002	-1.378	33.953	94.355	Leucine-rich repeat extensin 3	leucine-rich repeat extensin-like protein 4	XP_016504173.1	0
Wall proteins	Extensins	PGSC0003DMG400006243	PGSC0003DMP400011064	-1.649	2.069	11.764	OJ1116_C07.8 protein	extensin-like isoform X1	XP_016467819.1	0
Wall proteins	Extensins	PGSC0003DMG400008441	PGSC0003DMP400014815	-2.124	13.702	61.73	Proline-rich protein	pollen-specific leucine-rich repeat extensin-like protein 1	XP_016447112.1	1e-60
Wall proteins	Extensins	PGSC0003DMG400006027	PGSC0003DMP400010700	-2.383	3.668	29.22	Leucine-rich repeat/extensin	leucine-rich repeat extensin-like protein 2	XP_016512273.1	0
Wall proteins	Extensins	PGSC0003DMG400024151	PGSC0003DMP400041760	-3.797	0.125	1.719	Hydroxyproline-rich glycoprotein family protein	uncharacterized protein LOC107775760	XP_016451019.1	2e-119
Wall proteins	Extensins	PGSC0003DMG400016899	PGSC0003DMP400029532	-4.387	1.072	23.416	Leucine-rich repeat family protein / extensin family protein	leucine-rich repeat extensin-like protein 4	XP_016493272.1	0
Wall proteins	Extensins	PGSC0003DMG400020204	PGSC0003DMP400035078	-4.907	1.357	76.542	Hydrolase, acting on ester bonds	uncharacterized protein LOC107828040	XP_016510773.1	1e-105
Wall proteins	Extensins	PGSC0003DMG400019410	PGSC0003DMP400033719	-5.142	0.207	11.632	Heavy metal-associated domain containing protein	pollen-specific leucine-rich repeat extensin-like protein 1	XP_016459316.1	1e-36
Wall proteins	Extensins	PGSC0003DMG400007374	PGSC0003DMP400013054	-6.134	1.27	127.342	Extensin	predicted GPI-anchored protein 58	XP_016478493.1	2e-22
Wall proteins	Extensins	PGSC0003DMG400013274	PGSC0003DMP400023476	-6.665	0.189	15.53	Conserved gene of unknown function	uncharacterized protein LOC107777845	XP_016453480.1	3e-81
Wall proteins	Other proteins	PGSC0003DMG400030484	PGSC0003DMP400053043	8.281	38.578	0	Gene of unknown function	putative glycine-rich cell wall structural protein 1	XP_016504114.1	0.77
Wall proteins	Other proteins	PGSC0003DMG400030409	PGSC0003DMP400052925	6.605	151.695	1.491	Conserved gene of unknown function	putative glycine-rich cell wall structural protein 1	XP_016504114.1	2.6
Wall proteins	Other proteins	PGSC0003DMG400028901	PGSC0003DMP400050354	4.006	31.712	3.541	Proline-rich cell wall protein	uncharacterized protein LOC107819525	XP_016501128.1	2e-87
Wall proteins	Other proteins	PGSC0003DMG400001631	PGSC0003DMP400002953	-3.604	0.309	3.12	Proline-rich protein	proline-rich protein 4-like	XP_016470414.1	4e-108
Wall proteins	Other proteins	PGSC0003DMG400012234	PGSC0003DMP400021645	-10.92	0.122	21.504	Conserved gene of unknown function	protein BRANCHLESS TRICHOME-like	XP_016505400.1	8e-161
Wall proteins	Trichome birefringence-like	PGSC0003DMG400003117	PGSC0003DMP400005623	-1.167	6.274	19.094	Conserved gene of unknown function	protein trichome birefringence-like 12	XP_016506411.1	2e-141
Wall proteins	Trichome birefringence-like	PGSC0003DMG400007093	PGSC0003DMP400012583	-1.363	2.769	7.065	Conserved gene of unknown function	protein trichome birefringence-like 41	XP_016467910.1	0
Wall proteins	Trichome birefringence-like	PGSC0003DMG400005107	PGSC0003DMP400009078	-1.731	1.445	6.874	Conserved gene of unknown function	protein trichome birefringence-like 13 isoform X1	XP_016442990.1	0
Wall proteins	Trichome birefringence-like	PGSC0003DMG400010227	PGSC0003DMP400018078	-1.971	2.722	19.487	Alpha galactosidase	protein trichome birefringence-like 37	XP_016485633.1	0
Wall proteins	Trichome birefringence-like	PGSC0003DMG402000097	PGSC0003DMP400000221	-3.922	1.105	12.851	Conserved gene of unknown function	protein trichome birefringence-like 25	XP_016501797.1	0
Wall proteins	Trichome birefringence-like	PGSC0003DMG400026554	PGSC0003DMP400046145	-4.72	1.547	24.465	Conserved gene of unknown function	protein trichome birefringence-like 19	XP_016472338.1	0
Wall proteins	Trichome birefringence-like	PGSC0003DMG400010096	PGSC0003DMP400017896	-5.764	0.703	24.915	Conserved gene of unknown function	protein trichome birefringence-like 19	XP_016512419.1	0
Wall proteins	Trichome birefringence-like	PGSC0003DMG400010095	PGSC0003DMP400017895	-6.003	0.45	20.268	Conserved gene of unknown function	protein trichome birefringence-like 19	XP_016465436.1	0
Wall proteins	Trichome birefringence-like	PGSC0003DMG400023990	PGSC0003DMP400041470	-7.353	0.643	94.829	Conserved gene of unknown function	protein trichome birefringence-like 36	XP_016484682.1	0
Wall proteins	Trichome birefringence-like	PGSC0003DMG400004387	PGSC0003DMP400007789	-8.93	0.291	4.604	Alpha galactosidase	protein trichome birefringence-like 37	XP_016485633.1	0
