# Supplementary material for: The Modification of Plant Cell Wall Polysaccharides in Potato Plants during Pectobacterium atrosepticum-Caused Infection
Source: Plants (Basel). 2021 Jul 9;10(7):1407. doi: 10.3390/plants10071407 (PMC8309280; doi:10.3390/plants10071407)
Supplement: Supplementary file 1 [file plants-10-01407-s001.zip › Supplementary Table S3.xls]

## Sheet: PCWDE-encoding DEGs
Category	Ensembl gene ID	UniProt protein ID	UniProt annotation	CAZy family	CAZy annotation	Below necrotic zone in potato, log2FC	Below necrotic zone in potato, mean TPM	Control (in vitro), mean TPM
Polygalacturonic acid-degrading	ECA3111	Q6D2I4	exo-poly-alpha-D-galacturonosidase	GH28	polygalacturonase (EC 3.2.1.15); α-L-rhamnosidase (EC 3.2.1.40); exo-polygalacturonase (EC 3.2.1.67); exo-polygalacturonosidase (EC 3.2.1.82); rhamnogalacturonase (EC 3.2.1.171); rhamnogalacturonan α-1,2-galacturonohydrolase (EC 3.2.1.173); endo-xylogalac	nonDEG	55.911	50.35
Polygalacturonic acid-degrading	ECA4068	Q6CZT3	pectate lyase II	PL1	pectate lyase (EC 4.2.2.2); exo-pectate lyase (EC 4.2.2.9); pectin lyase (EC 4.2.2.10).	nonDEG	5953.74	4884.55
Polygalacturonic acid-degrading	ECA2426	Q59418	oligogalacturonate lyase	PL22	oligogalacturonate lyase / oligogalacturonide lyase (EC 4.2.2.6)	nonDEG	239.914	151.929
Polygalacturonic acid-degrading	ECA3112	Q6D2I3	pectate lyase	PL1	pectate lyase (EC 4.2.2.2); exo-pectate lyase (EC 4.2.2.9); pectin lyase (EC 4.2.2.10).	nonDEG	5.706	9.356
Polygalacturonic acid-degrading	ECA2402	Q6D4I8	pectate disaccharide-lyase	PL2	pectate lyase (EC 4.2.2.2); exo-polygalacturonate lyase (EC 4.2.2.9).	nonDEG	43.617	24.704
Polygalacturonic acid-degrading	ECA1094	Q6D881	pectate lyase	PL3	pectate lyase (EC 4.2.2.2)	2.998	10238.9	1209.86
Polygalacturonic acid-degrading	ECA4070	Q6CZT1	pectate lyase	PL1	pectate lyase (EC 4.2.2.2); exo-pectate lyase (EC 4.2.2.9); pectin lyase (EC 4.2.2.10).	2.477	207.532	35.197
Polygalacturonic acid-degrading	ECA1190	Q6D7Y5	putative polygalacturonase	GH28	polygalacturonase (EC 3.2.1.15); α-L-rhamnosidase (EC 3.2.1.40); exo-polygalacturonase (EC 3.2.1.67); exo-polygalacturonosidase (EC 3.2.1.82); rhamnogalacturonase (EC 3.2.1.171); rhamnogalacturonan α-1,2-galacturonohydrolase (EC 3.2.1.173); endo-xylogalac	1.834	31.61	8.417
Polygalacturonic acid-degrading	ECA4067	Q6CZT4	pectate lyase I	PL1	pectate lyase (EC 4.2.2.2); exo-pectate lyase (EC 4.2.2.9); pectin lyase (EC 4.2.2.10).	1.694	2413.74	703.036
Polygalacturonic acid-degrading	ECA2553	Q6D441	pectate lyase	PL9	pectate lyase (EC 4.2.2.2); exopolygalacturonate lyase (EC 4.2.2.9); thiopeptidoglycan lyase (EC 4.2.2.-)	1.66	210.315	62.805
Polygalacturonic acid-degrading	ECA4069	Q6CZT2	pectate lyase III	PL1	pectate lyase (EC 4.2.2.2); exo-pectate lyase (EC 4.2.2.9); pectin lyase (EC 4.2.2.10).	1.499	956.642	319.317
Polygalacturonic acid-degrading	ECA4510	Q6CYJ7	exopolygalacturonate lyase	PL9	pectate lyase (EC 4.2.2.2); exopolygalacturonate lyase (EC 4.2.2.9); thiopeptidoglycan lyase (EC 4.2.2.-)	1.299	66.45	25.57
Polygalacturonic acid-degrading	ECA1499	Q6D727	pectin lyase	PL1	pectate lyase (EC 4.2.2.2); exo-pectate lyase (EC 4.2.2.9); pectin lyase (EC 4.2.2.10).	1.154	168.093	71.384
Polygalacturonic acid-degrading	ECA3552	Q6D196	putative polygalacturonase	GH28	polygalacturonase (EC 3.2.1.15); α-L-rhamnosidase (EC 3.2.1.40); exo-polygalacturonase (EC 3.2.1.67); exo-polygalacturonosidase (EC 3.2.1.82); rhamnogalacturonase (EC 3.2.1.171); rhamnogalacturonan α-1,2-galacturonohydrolase (EC 3.2.1.173); endo-xylogalac	1.141	7.486	3.199
Polygalacturonic acid-degrading	ECA2135	Q6D5A5	periplasmic pectate lyase	PL2	pectate lyase (EC 4.2.2.2); exo-polygalacturonate lyase (EC 4.2.2.9).	-1.041	17.514	34.186
Polygalacturonic acid-degrading	ECA1095	Q6D880	endo-polygalacturonase	GH28	polygalacturonase (EC 3.2.1.15); α-L-rhamnosidase (EC 3.2.1.40); exo-polygalacturonase (EC 3.2.1.67); exo-polygalacturonosidase (EC 3.2.1.82); rhamnogalacturonase (EC 3.2.1.171); rhamnogalacturonan α-1,2-galacturonohydrolase (EC 3.2.1.173); endo-xylogalac	-3.294	93.156	862.834
Non-pectic PCW polysaccharide-degrading	ECA2827	Q6D3B7	beta(1,4)-glucan glucanohydrolase	GH12	endoglucanase (EC 3.2.1.4); xyloglucan hydrolase (EC 3.2.1.151); β-1,3-1,4-glucanase (EC 3.2.1.73); xyloglucan endotransglycosylase (EC 2.4.1.207)	nonDEG	1071.05	703.57
Non-pectic PCW polysaccharide-degrading	ECA4373	Q6CYY2	endoglucanase	GH8	chitosanase (EC 3.2.1.132); cellulase (EC 3.2.1.4); licheninase (EC 3.2.1.73); endo-1,4-β-xylanase (EC 3.2.1.8); reducing-end-xylose releasing exo-oligoxylanase (EC 3.2.1.156)	nonDEG	2.914	1.881
Non-pectic PCW polysaccharide-degrading	ECA1981	Q6D5R0	endoglucanase V	GH5,CBM3	endo-β-1,4-glucanase / cellulase (EC 3.2.1.4); endo-β-1,4-xylanase (EC 3.2.1.8); β-glucosidase (EC 3.2.1.21); β-mannosidase (EC 3.2.1.25); β-glucosylceramidase (EC 3.2.1.45); glucan β-1,3-glucosidase (EC 3.2.1.58); licheninase (EC 3.2.1.73); exo-β-1,4-glu	3.323	400.445	37.99
Non-pectic PCW polysaccharide-degrading	ECA2220	Q6D522	putative cellulase	CBM63	The CBM63 module of Bacillus subtilis expansin EXLX1 has been shown to bind cellulose	3.167	4134.49	436.708
Non-pectic PCW polysaccharide-degrading	ECA3793	Q6D0K5	putatuve glycosysl hydrolase	GH43	β-xylosidase (EC 3.2.1.37); α-L-arabinofuranosidase (EC 3.2.1.55); arabinanase (EC 3.2.1.99); xylanase (EC 3.2.1.8); galactan 1,3-β-galactosidase (EC 3.2.1.145); α-1,2-L-arabinofuranosidase (EC 3.2.1.-); exo-α-1,5-L-arabinofuranosidase (EC 3.2.1.-); [inve	1.187	65.839	27.458
Non-pectic PCW polysaccharide-degrading	ECA3847	Q6D0F2	putative xylosidase/arabinosidase	GH43	β-xylosidase (EC 3.2.1.37); α-L-arabinofuranosidase (EC 3.2.1.55); arabinanase (EC 3.2.1.99); xylanase (EC 3.2.1.8); galactan 1,3-β-galactosidase (EC 3.2.1.145); α-1,2-L-arabinofuranosidase (EC 3.2.1.-); exo-α-1,5-L-arabinofuranosidase (EC 3.2.1.-); [inve	-2.4	50.806	253.537
PCW polysaccharide esterases	ECA0107	Q6DAZ5	pectin methylesterase	CE8	pectin methylesterase (EC 3.1.1.11)	nonDEG	20.196	15.659
PCW polysaccharide esterases	ECA3252	Q6D244	pectin acetylesterase	CE12	pectin acetylesterase (EC 3.1.1.-); rhamnogalacturonan acetylesterase (EC 3.1.1.-); acetyl xylan esterase (EC 3.1.1.72)	nonDEG	31.373	26.995
PCW polysaccharide esterases	ECA3253	Q6D243	pectinesterase A	CE8	pectin methylesterase (EC 3.1.1.11)	nonDEG	27.344	18.935
PCW polysaccharide esterases	ECA1873	Q6D615	putative glycosyl hydrolase exoenzyme	CE1	acetyl xylan esterase (EC 3.1.1.72); cinnamoyl esterase (EC 3.1.1.-); feruloyl esterase (EC 3.1.1.73); carboxylesterase (EC 3.1.1.1); S-formylglutathione hydrolase (EC 3.1.2.12); diacylglycerol O-acyltransferase (EC 2.3.1.20); trehalose 6-O-mycolyltransfe	-2.191	8.717	37.595
Rhamnogalacturonan-degrading	ECA0852	Q6D8W9	putative exported plant proteoglycan hydrolase	GH53,CBM13	endo-β-1,4-galactanase (EC 3.2.1.89)	nonDEG	180.94	214.538
Rhamnogalacturonan-degrading	ECA3559	Q6D189	plant-inducible protein	GH105	unsaturated rhamnogalacturonyl hydrolase (EC 3.2.1.172); d-4,5-unsaturated β-glucuronyl hydrolase (EC 3.2.1.-)	nonDEG	26.434	20.92
Rhamnogalacturonan-degrading	ECA1490	Q6D736	beta-galactosidase	GH2	β-galactosidase (EC 3.2.1.23) ; β-mannosidase (EC 3.2.1.25); β-glucuronidase (EC 3.2.1.31); α-L-arabinofuranosidase (EC 3.2.1.55); mannosylglycoprotein endo-β-mannosidase (EC 3.2.1.152); exo-β-glucosaminidase (EC 3.2.1.165)	5.556	148.068	3.001
Rhamnogalacturonan-degrading	ECA3749	Q6D0P9	plant-inducible protein	GH105	unsaturated rhamnogalacturonyl hydrolase (EC 3.2.1.172); d-4,5-unsaturated β-glucuronyl hydrolase (EC 3.2.1.-)	3.388	21.222	1.948
Rhamnogalacturonan-degrading	ECA3178	Q6D2B8	putative arabinogalactan endo-1,4-beta-galactosidase	GH53	endo-β-1,4-galactanase (EC 3.2.1.89)	1.854	38.619	10.161
Rhamnogalacturonan-degrading	ECA0804	Q6D915	rhamnogalacturonate lyase	PL4	rhamnogalacturonan endolyase (EC 4.2.2.23)	1.583	12.117	3.848
Rhamnogalacturonan-degrading	ECA4303	Q6CZ50	putative exported protein	PL26	rhamnogalacturonan exolyase (EC 4.2.2.24).	1.412	1.372	0.469
Rhamnogalacturonan-degrading	ECA3179	Q6D2B7	beta-galactosidase	GH42	β-galactosidase (EC 3.2.1.23); α-L-arabinopyranosidase (EC 3.2.1.-)	1.173	79.73	33.578

## Sheet: Pba PCWDE in Potato vs Tobacco
Category	Ensembl gene ID	UniProt protein ID	UniProt annotation	CAZy family	CAZy annotation	Below necrotic zone in potato, log2FC	Below necrotic zone in tobacco, log2FC	Below necrotic zone in potato, mean TPM	Control (in vitro), mean TPM
Polygalacturonic acid-degrading	ECA3111	Q6D2I4	exo-poly-alpha-D-galacturonosidase	GH28	polygalacturonase (EC 3.2.1.15); α-L-rhamnosidase (EC 3.2.1.40); exo-polygalacturonase (EC 3.2.1.67); exo-polygalacturonosidase (EC 3.2.1.82); rhamnogalacturonase (EC 3.2.1.171); rhamnogalacturonan α-1,2-galacturonohydrolase (EC 3.2.1.173); endo-xylogalac	nonDEG	nonDEG	55.911	50.35
Polygalacturonic acid-degrading	ECA4068	Q6CZT3	pectate lyase II	PL1	pectate lyase (EC 4.2.2.2); exo-pectate lyase (EC 4.2.2.9); pectin lyase (EC 4.2.2.10).	nonDEG	nonDEG	5953.74	4884.55
Polygalacturonic acid-degrading	ECA2426	Q59418	oligogalacturonate lyase	PL22	oligogalacturonate lyase / oligogalacturonide lyase (EC 4.2.2.6)	nonDEG	2.5645	239.914	151.929
Polygalacturonic acid-degrading	ECA3112	Q6D2I3	pectate lyase	PL1	pectate lyase (EC 4.2.2.2); exo-pectate lyase (EC 4.2.2.9); pectin lyase (EC 4.2.2.10).	nonDEG	1.47728	5.706	9.356
Polygalacturonic acid-degrading	ECA2402	Q6D4I8	pectate disaccharide-lyase	PL2	pectate lyase (EC 4.2.2.2); exo-polygalacturonate lyase (EC 4.2.2.9).	nonDEG	1.11562	43.617	24.704
Polygalacturonic acid-degrading	ECA1094	Q6D881	pectate lyase	PL3	pectate lyase (EC 4.2.2.2)	2.998	nonDEG	10238.9	1209.86
Polygalacturonic acid-degrading	ECA4070	Q6CZT1	pectate lyase	PL1	pectate lyase (EC 4.2.2.2); exo-pectate lyase (EC 4.2.2.9); pectin lyase (EC 4.2.2.10).	2.477	2.62926	207.532	35.197
Polygalacturonic acid-degrading	ECA1190	Q6D7Y5	putative polygalacturonase	GH28	polygalacturonase (EC 3.2.1.15); α-L-rhamnosidase (EC 3.2.1.40); exo-polygalacturonase (EC 3.2.1.67); exo-polygalacturonosidase (EC 3.2.1.82); rhamnogalacturonase (EC 3.2.1.171); rhamnogalacturonan α-1,2-galacturonohydrolase (EC 3.2.1.173); endo-xylogalac	1.834	2.36579	31.61	8.417
Polygalacturonic acid-degrading	ECA4067	Q6CZT4	pectate lyase I	PL1	pectate lyase (EC 4.2.2.2); exo-pectate lyase (EC 4.2.2.9); pectin lyase (EC 4.2.2.10).	1.694	1.19058	2413.74	703.036
Polygalacturonic acid-degrading	ECA2553	Q6D441	pectate lyase	PL9	pectate lyase (EC 4.2.2.2); exopolygalacturonate lyase (EC 4.2.2.9); thiopeptidoglycan lyase (EC 4.2.2.-)	1.66	1.64612	210.315	62.805
Polygalacturonic acid-degrading	ECA4069	Q6CZT2	pectate lyase III	PL1	pectate lyase (EC 4.2.2.2); exo-pectate lyase (EC 4.2.2.9); pectin lyase (EC 4.2.2.10).	1.499	3.09059	956.642	319.317
Polygalacturonic acid-degrading	ECA4510	Q6CYJ7	exopolygalacturonate lyase	PL9	pectate lyase (EC 4.2.2.2); exopolygalacturonate lyase (EC 4.2.2.9); thiopeptidoglycan lyase (EC 4.2.2.-)	1.299	2.20078	66.45	25.57
Polygalacturonic acid-degrading	ECA1499	Q6D727	pectin lyase	PL1	pectate lyase (EC 4.2.2.2); exo-pectate lyase (EC 4.2.2.9); pectin lyase (EC 4.2.2.10).	1.154	1.14232	168.093	71.384
Polygalacturonic acid-degrading	ECA3552	Q6D196	putative polygalacturonase	GH28	polygalacturonase (EC 3.2.1.15); α-L-rhamnosidase (EC 3.2.1.40); exo-polygalacturonase (EC 3.2.1.67); exo-polygalacturonosidase (EC 3.2.1.82); rhamnogalacturonase (EC 3.2.1.171); rhamnogalacturonan α-1,2-galacturonohydrolase (EC 3.2.1.173); endo-xylogalac	1.141	nonDEG	7.486	3.199
Polygalacturonic acid-degrading	ECA2135	Q6D5A5	periplasmic pectate lyase	PL2	pectate lyase (EC 4.2.2.2); exo-polygalacturonate lyase (EC 4.2.2.9).	-1.041	nonDEG	17.514	34.186
Polygalacturonic acid-degrading	ECA1095	Q6D880	endo-polygalacturonase	GH28	polygalacturonase (EC 3.2.1.15); α-L-rhamnosidase (EC 3.2.1.40); exo-polygalacturonase (EC 3.2.1.67); exo-polygalacturonosidase (EC 3.2.1.82); rhamnogalacturonase (EC 3.2.1.171); rhamnogalacturonan α-1,2-galacturonohydrolase (EC 3.2.1.173); endo-xylogalac	-3.294	-1.16271	93.156	862.834
Non-pectic PCW polysaccharide-degrading	ECA2827	Q6D3B7	beta(1,4)-glucan glucanohydrolase	GH12	endoglucanase (EC 3.2.1.4); xyloglucan hydrolase (EC 3.2.1.151); β-1,3-1,4-glucanase (EC 3.2.1.73); xyloglucan endotransglycosylase (EC 2.4.1.207)	nonDEG	nonDEG	1071.05	703.57
Non-pectic PCW polysaccharide-degrading	ECA4373	Q6CYY2	endoglucanase	GH8	chitosanase (EC 3.2.1.132); cellulase (EC 3.2.1.4); licheninase (EC 3.2.1.73); endo-1,4-β-xylanase (EC 3.2.1.8); reducing-end-xylose releasing exo-oligoxylanase (EC 3.2.1.156)	nonDEG	nonDEG	2.914	1.881
Non-pectic PCW polysaccharide-degrading	ECA1981	Q6D5R0	endoglucanase V	GH5,CBM3	endo-β-1,4-glucanase / cellulase (EC 3.2.1.4); endo-β-1,4-xylanase (EC 3.2.1.8); β-glucosidase (EC 3.2.1.21); β-mannosidase (EC 3.2.1.25); β-glucosylceramidase (EC 3.2.1.45); glucan β-1,3-glucosidase (EC 3.2.1.58); licheninase (EC 3.2.1.73); exo-β-1,4-glu	3.323	2.12572	400.445	37.99
Non-pectic PCW polysaccharide-degrading	ECA2220	Q6D522	putative cellulase	CBM63	The CBM63 module of Bacillus subtilis expansin EXLX1 has been shown to bind cellulose	3.167	3.11212	4134.49	436.708
Non-pectic PCW polysaccharide-degrading	ECA3793	Q6D0K5	putatuve glycosysl hydrolase	GH43	β-xylosidase (EC 3.2.1.37); α-L-arabinofuranosidase (EC 3.2.1.55); arabinanase (EC 3.2.1.99); xylanase (EC 3.2.1.8); galactan 1,3-β-galactosidase (EC 3.2.1.145); α-1,2-L-arabinofuranosidase (EC 3.2.1.-); exo-α-1,5-L-arabinofuranosidase (EC 3.2.1.-); [inve	1.187	nonDEG	65.839	27.458
Non-pectic PCW polysaccharide-degrading	ECA3847	Q6D0F2	putative xylosidase/arabinosidase	GH43	β-xylosidase (EC 3.2.1.37); α-L-arabinofuranosidase (EC 3.2.1.55); arabinanase (EC 3.2.1.99); xylanase (EC 3.2.1.8); galactan 1,3-β-galactosidase (EC 3.2.1.145); α-1,2-L-arabinofuranosidase (EC 3.2.1.-); exo-α-1,5-L-arabinofuranosidase (EC 3.2.1.-); [inve	-2.4	-1.14514	50.806	253.537
PCW polysaccharide esterases	ECA0107	Q6DAZ5	pectin methylesterase	CE8	pectin methylesterase (EC 3.1.1.11)	nonDEG	nonDEG	20.196	15.659
PCW polysaccharide esterases	ECA3252	Q6D244	pectin acetylesterase	CE12	pectin acetylesterase (EC 3.1.1.-); rhamnogalacturonan acetylesterase (EC 3.1.1.-); acetyl xylan esterase (EC 3.1.1.72)	nonDEG	nonDEG	31.373	26.995
PCW polysaccharide esterases	ECA3253	Q6D243	pectinesterase A	CE8	pectin methylesterase (EC 3.1.1.11)	nonDEG	nonDEG	27.344	18.935
PCW polysaccharide esterases	ECA1873	Q6D615	putative glycosyl hydrolase exoenzyme	CE1	acetyl xylan esterase (EC 3.1.1.72); cinnamoyl esterase (EC 3.1.1.-); feruloyl esterase (EC 3.1.1.73); carboxylesterase (EC 3.1.1.1); S-formylglutathione hydrolase (EC 3.1.2.12); diacylglycerol O-acyltransferase (EC 2.3.1.20); trehalose 6-O-mycolyltransfe	-2.191	-1.0949	8.717	37.595
Rhamnogalacturonan-degrading	ECA0852	Q6D8W9	putative exported plant proteoglycan hydrolase	GH53,CBM13	endo-β-1,4-galactanase (EC 3.2.1.89)	nonDEG	nonDEG	180.94	214.538
Rhamnogalacturonan-degrading	ECA3559	Q6D189	plant-inducible protein	GH105	unsaturated rhamnogalacturonyl hydrolase (EC 3.2.1.172); d-4,5-unsaturated β-glucuronyl hydrolase (EC 3.2.1.-)	nonDEG	nonDEG	26.434	20.92
Rhamnogalacturonan-degrading	ECA1490	Q6D736	beta-galactosidase	GH2	β-galactosidase (EC 3.2.1.23) ; β-mannosidase (EC 3.2.1.25); β-glucuronidase (EC 3.2.1.31); α-L-arabinofuranosidase (EC 3.2.1.55); mannosylglycoprotein endo-β-mannosidase (EC 3.2.1.152); exo-β-glucosaminidase (EC 3.2.1.165)	5.556	3.4011	148.068	3.001
Rhamnogalacturonan-degrading	ECA3749	Q6D0P9	plant-inducible protein	GH105	unsaturated rhamnogalacturonyl hydrolase (EC 3.2.1.172); d-4,5-unsaturated β-glucuronyl hydrolase (EC 3.2.1.-)	3.388	3.97169	21.222	1.948
Rhamnogalacturonan-degrading	ECA3178	Q6D2B8	putative arabinogalactan endo-1,4-beta-galactosidase	GH53	endo-β-1,4-galactanase (EC 3.2.1.89)	1.854	1.27567	38.619	10.161
Rhamnogalacturonan-degrading	ECA0804	Q6D915	rhamnogalacturonate lyase	PL4	rhamnogalacturonan endolyase (EC 4.2.2.23)	1.583	nonDEG	12.117	3.848
Rhamnogalacturonan-degrading	ECA4303	Q6CZ50	putative exported protein	PL26	rhamnogalacturonan exolyase (EC 4.2.2.24).	1.412	nonDEG	1.372	0.469
Rhamnogalacturonan-degrading	ECA3179	Q6D2B7	beta-galactosidase	GH42	β-galactosidase (EC 3.2.1.23); α-L-arabinopyranosidase (EC 3.2.1.-)	1.173	nonDEG	79.73	33.578
