# Supplementary material for: The Modification of Plant Cell Wall Polysaccharides in Potato Plants during Pectobacterium atrosepticum-Caused Infection
Source: Plants (Basel). 2021 Jul 9;10(7):1407. doi: 10.3390/plants10071407 (PMC8309280; doi:10.3390/plants10071407)
Supplement: Supplementary file 1 [file plants-10-01407-s001.zip › Supplementary Table S4.xls]

## Sheet: Table S4
Supercategory	Category	Potato PGSC gene ID	Potato PGSC protein ID	Potato vs. Tobacco BLAST coverage, %	Potato vs. Tobacco BLAST identity, %	Tobacco RefSeq gene ID	Tobacco RefSeq protein ID	Potato: relative gene expression in Below necrotic zone vs Control, log2FC	Tobacco relative gene expression in Below necrotic zone vs Control, log2FC	Potato: absolute gene expression in Below necrotic zone, mean TPM	Potato: absolute gene expression in Control, mean TPM	Tobacco absolute gene expression in Below necrotic zone, mean TPM	Tobacco absolute gene expression in Control, mean TPM	Potato PGSC gene product annotation	Tobacco RefSeq gene product annotation
Callose degradation	Beta-1,3-glucosidases	PGSC0003DMG400005021	PGSC0003DMP400008957	95	83.586	LOC107781457	XP_016457642.1	non-EXP	-1.59	non-EXP	non-EXP	2.658	8.017	Glucan endo-1,3-beta-glucosidase	glucan endo-1,3-beta-glucosidase 11-like
Callose degradation	Beta-1,3-glucosidases	PGSC0003DMG400005021	PGSC0003DMP400008957	93	81.864	LOC107760295	XP_016433812.1	non-EXP	-1.706	non-EXP	non-EXP	2.622	8.565	Glucan endo-1,3-beta-glucosidase	glucan endo-1,3-beta-glucosidase 11-like
Callose degradation	Beta-1,3-glucosidases	PGSC0003DMG401015669	PGSC0003DMP400027455	100	85.429	LOC107799671	XP_016478298.1	non-EXP	-1.735	non-EXP	non-EXP	0.884	2.955	Glucan endo-1,3-beta-glucosidase	glucan endo-1,3-beta-glucosidase 2-like
Callose degradation	Beta-1,3-glucosidases	PGSC0003DMG400010483	PGSC0003DMP400018538	98	73.851	LOC107825406	XP_016507752.1	non-EXP	-2.034	non-EXP	non-EXP	1.145	4.77	Glucan endo-1,3-beta-glucosidase	glucan endo-1,3-beta-glucosidase, acidic
Callose degradation	Beta-1,3-glucosidases	PGSC0003DMG401015669	PGSC0003DMP400027455	100	86.028	LOC107817900	XP_016499279.1	non-EXP	-2.149	non-EXP	non-EXP	0.626	2.784	Glucan endo-1,3-beta-glucosidase	glucan endo-1,3-beta-glucosidase 2-like
Callose degradation	Beta-1,3-glucosidases	PGSC0003DMG400010483	PGSC0003DMP400018538	100	77.035	LOC107763289	XP_016437252.1	non-EXP	-2.478	non-EXP	non-EXP	2.005	11.341	Glucan endo-1,3-beta-glucosidase	glucan endo-1,3-beta-glucosidase, acidic
Callose degradation	Beta-1,3-glucosidases	PGSC0003DMG400013292	PGSC0003DMP400023509	85	82.759	LOC107761977	XP_016435766.1	non-EXP	-3.563	non-EXP	non-EXP	2.105	25.071	Hydrolase, hydrolyzing O-glycosyl compounds	glucan endo-1,3-beta-glucosidase 4-like
Callose degradation	Beta-1,3-glucosidases	PGSC0003DMG400010483	PGSC0003DMP400018538	96	75.723	LOC107789548	XP_016466874.1	non-EXP	-4.162	non-EXP	non-EXP	0.093	1.752	Glucan endo-1,3-beta-glucosidase	glucan endo-1,3-beta-glucosidase, acidic
Callose degradation	Beta-1,3-glucosidases	PGSC0003DMG400014912	PGSC0003DMP400026238	100	73.517	LOC107811909	XP_016492386.1	non-EXP	-5.252	non-EXP	non-EXP	0.023	0.882	Beta-1,3-glucanase	glucan endo-1,3-beta-glucosidase 8-like isoform X1
Callose degradation	Beta-1,3-glucosidases	PGSC0003DMG400008727	PGSC0003DMP400015349	99	88.793	LOC107770592	XP_016445400.1	non-DEG	-1.294	4.997	6.145	2.482	6.128	Beta-1,3-glucanase	probable glucan endo-1,3-beta-glucosidase A6
Callose degradation	Beta-1,3-glucosidases	PGSC0003DMG400008727	PGSC0003DMP400015349	99	88.602	LOC107819324	XP_016500911.1	non-DEG	-1.94	4.997	6.145	1.024	3.997	Beta-1,3-glucanase	probable glucan endo-1,3-beta-glucosidase A6
Callose degradation	Beta-1,3-glucosidases	PGSC0003DMG400012702	PGSC0003DMP400022509	93	88.438	LOC107814850	XP_016495818.1	6.854	3.923	27.811	0.224	65.798	4.381	Glucan endo-1,3-beta-D-glucosidase	glucan endo-1,3-beta-glucosidase, acidic
Callose degradation	Beta-1,3-glucosidases	PGSC0003DMG400040260	PGSC0003DMP400062364	89	91.239	LOC107823411	XP_016505539.1	6.502	6.484	8550.64	88.989	4124.71	46.6	Glucan endo-1,3-beta-glucosidase, basic isoform 1	glucan endo-1,3-beta-glucosidase, basic vacuolar
Callose degradation	Beta-1,3-glucosidases	PGSC0003DMG400040260	PGSC0003DMP400062364	89	92.145	LOC107801151	XP_016479922.1	6.502	6.133	8550.64	88.989	6045.86	87.165	Glucan endo-1,3-beta-glucosidase, basic isoform 1	glucan endo-1,3-beta-glucosidase, basic vacuolar
Callose degradation	Beta-1,3-glucosidases	PGSC0003DMG400040260	PGSC0003DMP400062364	74	57.778	LOC107809780	XP_016489956.1	6.502	4.838	8550.64	88.989	4.325	0.126	Glucan endo-1,3-beta-glucosidase, basic isoform 1	lichenase-like
Callose degradation	Beta-1,3-glucosidases	PGSC0003DMG400040260	PGSC0003DMP400062364	90	74.096	LOC107814806	XP_016495750.1	6.502	3.618	8550.64	88.989	3.387	0.292	Glucan endo-1,3-beta-glucosidase, basic isoform 1	lichenase
Callose degradation	Beta-1,3-glucosidases	PGSC0003DMG401010492	PGSC0003DMP400018564	99	77.58	LOC107763289	XP_016437252.1	5.101	-2.478	18.913	0.668	2.005	11.341	Acidic class II 1,3-beta-glucanase	glucan endo-1,3-beta-glucosidase, acidic
Callose degradation	Beta-1,3-glucosidases	PGSC0003DMG402010492	PGSC0003DMP400018565	97	78.012	LOC107763289	XP_016437252.1	4.565	-2.478	35.536	1.892	2.005	11.341	Acidic class II 1,3-beta-glucanase	glucan endo-1,3-beta-glucosidase, acidic
Callose degradation	Beta-1,3-glucosidases	PGSC0003DMG400029830	PGSC0003DMP400051976	99	84.012	LOC107765187	XP_016439292.1	3.694	non-DEG	153.044	16.304	4.964	2.435	Glucan endo-1,3-beta-D-glucosidase	glucan endo-1,3-beta-glucosidase, acidic-like
Callose degradation	Beta-1,3-glucosidases	PGSC0003DMG400026359	PGSC0003DMP400045756	100	86.423	LOC107809991	XP_016490197.1	2.751	3.234	272.055	57.505	43.622	4.709	Glucan endo-1,3-beta-glucosidase	glucan endo-1,3-beta-glucosidase 14-like
Callose degradation	Beta-1,3-glucosidases	PGSC0003DMG400026359	PGSC0003DMP400045756	100	86.684	LOC107790272	XP_016467666.1	2.751	2.93	272.055	57.505	37.771	5	Glucan endo-1,3-beta-glucosidase	glucan endo-1,3-beta-glucosidase 14-like
Callose degradation	Beta-1,3-glucosidases	PGSC0003DMG400026359	PGSC0003DMP400045756	79	55.937	LOC107786057	XP_016462978.1	2.751	2.561	272.055	57.505	3.214	0.514	Glucan endo-1,3-beta-glucosidase	glucan endo-1,3-beta-glucosidase 11-like
Callose degradation	Beta-1,3-glucosidases	PGSC0003DMG400008368	PGSC0003DMP400014691	96	90.909	LOC107775262	XP_016450467.1	2.106	non-EXP	2.926	0.606	non-EXP	non-EXP	Beta-1,3-glucanase, acidic	glucan endo-1,3-beta-glucosidase 8-like
Callose degradation	Beta-1,3-glucosidases	PGSC0003DMG400008368	PGSC0003DMP400014691	100	88.125	LOC107773047	XP_016447982.1	2.106	-1.315	2.926	0.606	0.516	1.294	Beta-1,3-glucanase, acidic	glucan endo-1,3-beta-glucosidase 8-like
Callose degradation	Beta-1,3-glucosidases	PGSC0003DMG400012940	PGSC0003DMP400022914	99	90.295	LOC107797100	XP_016475447.1	1.139	non-EXP	13.302	8.798	non-EXP	non-EXP	Beta-1,3-glucanase, acidic	glucan endo-1,3-beta-glucosidase 8-like
Callose degradation	Beta-1,3-glucosidases	PGSC0003DMG400018289	PGSC0003DMP400031881	93	70.455	LOC107766899	XP_016441275.1	-1.611	-2.382	8.824	42.978	0.34	1.791	Hydrolase, hydrolyzing O-glycosyl compounds	glucan endo-1,3-beta-glucosidase 3-like
Callose degradation	Beta-1,3-glucosidases	PGSC0003DMG402016475	PGSC0003DMP400028816	95	93.625	LOC107827041	XP_016509585.1	-1.647	-1.336	2.033	7.452	2.553	6.471	Glucan endo-1,3-beta-glucosidase	glucan endo-1,3-beta-glucosidase 1-like
Callose degradation	Beta-1,3-glucosidases	PGSC0003DMG402016475	PGSC0003DMP400028816	100	91.985	LOC107790109	XP_016467498.1	-1.647	-1.609	2.033	7.452	2.773	8.485	Glucan endo-1,3-beta-glucosidase	glucan endo-1,3-beta-glucosidase 1-like
Callose degradation	Beta-1,3-glucosidases	PGSC0003DMG400005138	PGSC0003DMP400009120	99	78.495	LOC107821387	XP_016503311.1	-2.524	-1.111	15.888	165.475	6.219	13.554	Glucan endo-1,3-beta-glucosidase	glucan endo-1,3-beta-glucosidase 7-like
Callose degradation	Beta-1,3-glucosidases	PGSC0003DMG402000722	PGSC0003DMP400001406	100	87.292	LOC107760596	XP_016434156.1	-2.629	-2.189	8.399	89.986	4.523	20.705	Glucan endo-1,3-beta-glucosidase	glucan endo-1,3-beta-D-glucosidase-like isoform X1
Callose degradation	Beta-1,3-glucosidases	PGSC0003DMG402000722	PGSC0003DMP400001406	100	86.25	LOC107793272	XP_016471079.1	-2.629	-2.953	8.399	89.986	1.614	12.558	Glucan endo-1,3-beta-glucosidase	glucan endo-1,3-beta-D-glucosidase-like isoform X1
Callose degradation	Beta-1,3-glucosidases	PGSC0003DMG400032133	PGSC0003DMP400055271	99	88.531	LOC107816139	XP_016497310.1	-2.702	-1.824	2.114	9.236	1.433	5.109	Glucan endo-1,3-beta-glucosidase 4	glucan endo-1,3-beta-glucosidase 4
Callose degradation	Beta-1,3-glucosidases	PGSC0003DMG400002303	PGSC0003DMP400004113	99	84.6	LOC107798110	XP_016476553.1	-2.975	-2.554	0.359	6.803	0.196	1.142	Glucan endo-1,3-beta-glucosidase	glucan endo-1,3-beta-glucosidase 5-like
Callose degradation	Beta-1,3-glucosidases	PGSC0003DMG400000354	PGSC0003DMP400000698	98	89.549	LOC107801295	XP_016480088.1	-3.582	-1.284	0.667	10.141	2.333	5.716	Glucan endo-1,3-beta-glucosidase	glucan endo-1,3-beta-glucosidase 13-like
Callose degradation	Beta-1,3-glucosidases	PGSC0003DMG400000354	PGSC0003DMP400000698	98	89.754	LOC107776461	XP_016451848.1	-3.582	-2.294	0.667	10.141	1.018	5.028	Glucan endo-1,3-beta-glucosidase	glucan endo-1,3-beta-glucosidase 13-like
Callose degradation	Beta-1,3-glucosidases	PGSC0003DMG400012112	PGSC0003DMP400021400	93	85.825	LOC107759527	XP_016432978.1	-4.484	-2.248	1.597	34.456	1.115	5.351	Glucan endo-1,3-beta-glucosidase	glucan endo-1,3-beta-glucosidase 11-like
Callose degradation	Beta-1,3-glucosidases	PGSC0003DMG400012112	PGSC0003DMP400021400	93	87.629	LOC107827850	XP_016510551.1	-4.484	-2.6	1.597	34.456	0.949	5.835	Glucan endo-1,3-beta-glucosidase	glucan endo-1,3-beta-glucosidase 11-like
Callose degradation	Beta-1,3-glucosidases	PGSC0003DMG400019735	PGSC0003DMP400034300	100	86.983	LOC107822130	XP_016504116.1	-4.7	-1.388	0.377	8.422	1.135	3.003	Glucan endo-1,3-beta-glucosidase	glucan endo-1,3-beta-glucosidase 5-like
Callose degradation	Beta-1,3-glucosidases	PGSC0003DMG400019735	PGSC0003DMP400034300	100	87.19	LOC107811144	XP_016491509.1	-4.7	-1.453	0.377	8.422	1.669	4.618	Glucan endo-1,3-beta-glucosidase	glucan endo-1,3-beta-glucosidase 5-like isoform X1
Callose degradation	Beta-1,3-glucosidases	PGSC0003DMG401012862	PGSC0003DMP400022782	96	83.37	LOC107803828	XP_016483130.1	-5.342	non-DEG	0.386	17.392	10.02	8.489	Elicitor inducible beta-1,3-glucanase NtEIG-E76	glucan endo-1,3-beta-glucosidase 13-like
Callose degradation	Beta-1,3-glucosidases	PGSC0003DMG400000689	PGSC0003DMP400001352	100	88.559	LOC107786565	XP_016463544.1	-6.854	-2.402	0.29	59.253	0.627	3.334	Glucan endo-1,3-beta-glucosidase	glucan endo-1,3-beta-glucosidase 12-like
Callose degradation	Beta-1,3-glucosidases	PGSC0003DMG400000689	PGSC0003DMP400001352	100	89.619	LOC107823710	XP_016505887.1	-6.854	-2.631	0.29	59.253	1.145	7.139	Glucan endo-1,3-beta-glucosidase	glucan endo-1,3-beta-glucosidase 12-like
Callose degradation	Beta-1,3-glucosidases	PGSC0003DMG400014457	PGSC0003DMP400025472	100	82.441	LOC107826611	XP_016509101.1	-8.261	-5.405	0.044	16.779	0.473	20.491	Glucan endo-1,3-beta-glucosidase	glucan endo-1,3-beta-glucosidase 12-like
Callose degradation	Beta-1,3-glucosidases	PGSC0003DMG400014457	PGSC0003DMP400025472	100	83.084	LOC107767659	XP_016442222.1	-8.261	-5.978	0.044	16.779	0.162	10.532	Glucan endo-1,3-beta-glucosidase	glucan endo-1,3-beta-glucosidase 12-like
Callose degradation	Beta-1,3-glucosidases	PGSC0003DMG400017347	PGSC0003DMP400030316	93	75.6	LOC107788136	XP_016465281.1	-9.262	-2.906	0	8.692	0.302	2.357	Hydrolase, hydrolyzing O-glycosyl compounds	glucan endo-1,3-beta-glucosidase 3-like
Callose synthesis	Callose synthases	PGSC0003DMG400018343	PGSC0003DMP400031964	99	94.57	LOC107811977	XP_016492463.1	1.218	non-DEG	36.77	27.201	22.72	23.835	Transferase, transferring glycosyl groups	callose synthase 12-like
Callose synthesis	Callose synthases	PGSC0003DMG400029691	PGSC0003DMP400051720	99	90.535	LOC107818477	XP_016499989.1	-1.179	non-EXP	3.023	11.476	non-EXP	non-EXP	Transferase, transferring glycosyl groups	callose synthase 11-like
Callose synthesis	Callose synthases	PGSC0003DMG400028981	PGSC0003DMP400050499	99	95.207	LOC107779256	XP_016455135.1	-1.913	non-EXP	10.382	51.062	non-EXP	non-EXP	Transferase, transferring glycosyl groups	callose synthase 2-like
Callose synthesis	Callose synthases	PGSC0003DMG400032202	PGSC0003DMP400055406	100	92.248	LOC107806364	XP_016485996.1	-2.408	-1.159	6.592	47.742	29.086	65.227	Callose synthase 3	callose synthase 3-like
Callose synthesis	Callose synthases	PGSC0003DMG400032202	PGSC0003DMP400055406	89	85.92	LOC107818703	XP_016500219.1	-2.408	-1.346	6.592	47.742	1.463	3.765	Callose synthase 3	callose synthase 3-like
Callose synthesis	Callose synthases	PGSC0003DMG400013578	PGSC0003DMP400024035	99	69.161	LOC107790813	XP_016468267.1	-2.415	non-DEG	0.273	1.216	6.71	6.271	Putative callose synthase	pentatricopeptide repeat-containing protein At4g11690-like
Callose synthesis	Callose synthases	PGSC0003DMG400013218	PGSC0003DMP400023379	99	94.595	LOC107780972	XP_016457082.1	-4.001	non-EXP	0.23	5.21	non-EXP	non-EXP	Transferase, transferring glycosyl groups	putative callose synthase 8 isoform X2
Callose synthesis	Callose synthases	PGSC0003DMG402007052	PGSC0003DMP400012502	96	89.796	LOC107771418	XP_016446262.1	-4.176	non-EXP	0.234	4.061	non-EXP	non-EXP	Transferase, transferring glycosyl groups	putative callose synthase 8
Callose synthesis	Callose synthases	PGSC0003DMG401007052	PGSC0003DMP400012501	61	88.593	LOC107780972	XP_016457080.1	-4.27	-1.168	0.225	4.468	2.017	4.547	Callose synthase 8	putative callose synthase 8 isoform X1
Callose synthesis	PDCB proteins	PGSC0003DMG400028376	PGSC0003DMP400049351	99	75.862	LOC107813557	XP_016494324.1	non-EXP	-2.035	non-EXP	non-EXP	6.731	27.79	Hydrolase, hydrolyzing O-glycosyl compounds	PLASMODESMATA CALLOSE-BINDING PROTEIN 3-like
Callose synthesis	PDCB proteins	PGSC0003DMG401009389	PGSC0003DMP400016594	75	81.429	LOC107827400	XP_016510024.1	non-EXP	-2.323	non-EXP	non-EXP	0.487	2.565	Hydrolase, hydrolyzing O-glycosyl compounds	PLASMODESMATA CALLOSE-BINDING PROTEIN 5-like
Callose synthesis	PDCB proteins	PGSC0003DMG400017797	PGSC0003DMP400031092	82	84.27	LOC107813897	XP_016494698.1	-1.466	non-DEG	7.158	23.587	16.648	27.406	Hydrolase, hydrolyzing O-glycosyl compounds	PLASMODESMATA CALLOSE-BINDING PROTEIN 3-like
Callose synthesis	PDCB proteins	PGSC0003DMG401009389	PGSC0003DMP400016593	49	77.391	LOC107827400	XP_016510024.1	-1.549	-2.323	5.24	18.213	0.487	2.565	Hydrolase, hydrolyzing O-glycosyl compounds	PLASMODESMATA CALLOSE-BINDING PROTEIN 5-like
Callose synthesis	PDCB proteins	PGSC0003DMG400028376	PGSC0003DMP400049353	99	78.431	LOC107813557	XP_016494324.1	-1.878	-2.035	10.59	58.773	6.731	27.79	Hydrolase, hydrolyzing O-glycosyl compounds	PLASMODESMATA CALLOSE-BINDING PROTEIN 3-like
Callose synthesis	PDCB proteins	PGSC0003DMG400024642	PGSC0003DMP400042653	100	76.471	LOC107795678	XP_016473838.1	-9.127	-2.463	0.135	92.174	6.505	36.11	Glucan endo-1,3-beta-glucosidase 3	PLASMODESMATA CALLOSE-BINDING PROTEIN 3-like
Callose synthesis	PDCB proteins	PGSC0003DMG400024642	PGSC0003DMP400042653	99	76.19	LOC107772798	XP_016447757.1	-9.127	-2.521	0.135	92.174	11.315	65.277	Glucan endo-1,3-beta-glucosidase 3	PLASMODESMATA CALLOSE-BINDING PROTEIN 3-like
Callose synthesis	PDCB proteins	PGSC0003DMG400001211	PGSC0003DMP400002205	99	69.898	LOC107768893	XP_016443544.1	-9.763	-1.923	0.121	17.818	6.86	26.135	Hydrolase, hydrolyzing O-glycosyl compounds	PLASMODESMATA CALLOSE-BINDING PROTEIN 3-like
Callose synthesis	PDCB proteins	PGSC0003DMG400001211	PGSC0003DMP400002205	91	71.429	LOC107830124	XP_016513092.1	-9.763	-3.268	0.121	17.818	1.831	17.761	Hydrolase, hydrolyzing O-glycosyl compounds	PLASMODESMATA CALLOSE-BINDING PROTEIN 3-like
Cellulose synthesis	CESAs (primary wall)	PGSC0003DMG400010794	PGSC0003DMP400019073	99	95.054	LOC107816532	XP_016497742.1	non-DEG	-2.006	64.287	58.266	9.715	39.264	Cellulose synthase	probable cellulose synthase A catalytic subunit 9 [UDP-forming]
Cellulose synthesis	CESAs (primary wall)	PGSC0003DMG400010794	PGSC0003DMP400019073	100	94.094	LOC107800532	XP_016479208.1	non-DEG	-2.045	64.287	58.266	16.347	67.882	Cellulose synthase	cellulose synthase A catalytic subunit 6 [UDP-forming]-like
Cellulose synthesis	CESAs (primary wall)	PGSC0003DMG400020783	PGSC0003DMP400036122	99	95.488	LOC107795298	XP_016473391.1	-2.078	non-EXP	74.182	428.718	non-EXP	non-EXP	Cellulose synthase A catalytic subunit 6 [UDP-forming]	cellulose synthase A catalytic subunit 1 [UDP-forming]
Cellulose synthesis	CESAs (primary wall)	PGSC0003DMG400020783	PGSC0003DMP400036122	100	95.304	LOC107783802	XP_016460309.1	-2.078	-1.91	74.182	428.718	39.17	148.158	Cellulose synthase A catalytic subunit 6 [UDP-forming]	cellulose synthase A catalytic subunit 1 [UDP-forming]-like
Cellulose synthesis	CESAs (primary wall)	PGSC0003DMG400020783	PGSC0003DMP400036122	100	64.499	LOC107820514	XP_016502290.1	-2.078	-6.788	74.182	428.718	1.325	147.793	Cellulose synthase A catalytic subunit 6 [UDP-forming]	cellulose synthase A catalytic subunit 4 [UDP-forming] isoform X1
Cellulose synthesis	CESAs (primary wall)	PGSC0003DMG400006799	PGSC0003DMP400012046	99	97.516	LOC107771167	XP_016445983.1	-2.161	non-EXP	68.752	434.506	non-EXP	non-EXP	Cellulose synthase	cellulose synthase A catalytic subunit 3 [UDP-forming]-like
Cellulose synthesis	CESAs (primary wall)	PGSC0003DMG400006799	PGSC0003DMP400012046	100	97.332	LOC107809423	XP_016489545.1	-2.161	-1.659	68.752	434.506	52.392	166.719	Cellulose synthase	cellulose synthase A catalytic subunit 3 [UDP-forming]
Cellulose synthesis	CESAs (secondary wal)	PGSC0003DMG400028426	PGSC0003DMP400049457	99	93.986	LOC107828491	XP_016511297.1	non-EXP	-8.09	non-EXP	non-EXP	0.188	51.518	Cellulose synthase catalytic subunit	cellulose synthase A catalytic subunit 8 [UDP-forming]-like
Cellulose synthesis	CESAs (secondary wal)	PGSC0003DMG400028426	PGSC0003DMP400049457	99	93.68	LOC107830312	XP_016513328.1	non-EXP	-8.199	non-EXP	non-EXP	0.151	44.548	Cellulose synthase catalytic subunit	cellulose synthase A catalytic subunit 8 [UDP-forming]-like
Cellulose synthesis	CESAs (secondary wal)	PGSC0003DMG400011148	PGSC0003DMP400019689	100	52.889	LOC107817758	XP_016499109.1	non-EXP	-8.886	non-EXP	non-EXP	0.16	78.388	Cellulose synthase 3	cellulose synthase A catalytic subunit 4 [UDP-forming]-like
Cellulose synthesis	CESAs (secondary wall)	PGSC0003DMG400006660	PGSC0003DMP400011771	99	93.676	LOC107805577	XP_016485123.1	-6.157	non-EXP	4.256	394.135	non-EXP	non-EXP	Cellulose synthase catalytic subunit	cellulose synthase A catalytic subunit 2 [UDP-forming]-like
Cellulose synthesis	CESAs (secondary wall)	PGSC0003DMG400006660	PGSC0003DMP400011771	100	93.315	LOC107832318	XP_016515627.1	-6.157	-3.472	4.256	394.135	13.157	146.835	Cellulose synthase catalytic subunit	cellulose synthase A catalytic subunit 2 [UDP-forming]-like
Cellulose synthesis	CESAs (secondary wall)	PGSC0003DMG400003822	PGSC0003DMP400006805	99	96.17	LOC107820514	XP_016502290.1	-7.343	-6.788	2.859	451.066	1.325	147.793	Cellulose synthase	cellulose synthase A catalytic subunit 4 [UDP-forming] isoform X1
Cellulose synthesis	CESAs (secondary wall)	PGSC0003DMG400028426	PGSC0003DMP400049456	99	91.559	LOC107828491	XP_016511297.1	-7.773	-8.09	2.282	449.258	0.188	51.518	Cellulose synthase catalytic subunit	cellulose synthase A catalytic subunit 8 [UDP-forming]-like
Cellulose synthesis	CESAs (secondary wall)	PGSC0003DMG400011148	PGSC0003DMP400019690	99	96.061	LOC107806628	XP_016486305.1	-9.095	non-EXP	1.3	640.884	non-EXP	non-EXP	Cellulose synthase 3	cellulose synthase A catalytic subunit 7 [UDP-forming]-like isoform X2
Cellulose synthesis	CESAs (secondary wall)	PGSC0003DMG400011148	PGSC0003DMP400019690	100	92.678	LOC107806628	XP_016486304.1	-9.095	-8.374	1.3	640.884	0.371	124.156	Cellulose synthase 3	cellulose synthase A catalytic subunit 7 [UDP-forming]-like isoform X1
Cellulose synthesis	COBRA	PGSC0003DMG400014428	PGSC0003DMP400025423	97	80.216	LOC107829370	XP_016512322.1	2.605	non-EXP	1.063	0.227	non-EXP	non-EXP	Protein COBRA	COBRA-like protein 10
Cellulose synthesis	COBRA	PGSC0003DMG400001371	PGSC0003DMP400002471	99	92.018	LOC107807501	XP_016487395.1	-3.197	non-DEG	0.927	10.664	8.071	15.895	Protein COBRA	protein COBRA-like
Cellulose synthesis	COBRA	PGSC0003DMG400001465	PGSC0003DMP400002658	96	93.556	LOC107806738	XP_016486487.1	-5.374	-6.503	0.299	31.913	0.022	2.282	Protein COBRA	COBRA-like protein 4 isoform X1
Cellulose synthesis	COBRA	PGSC0003DMG400001465	PGSC0003DMP400002658	96	93.317	LOC107807502	XP_016487396.1	-5.374	-8.626	0.299	31.913	0	1.201	Protein COBRA	COBRA-like protein 4
Cellulose synthesis	COBRA	PGSC0003DMG400001031	PGSC0003DMP400001940	98	93.176	LOC107826792	XP_016509309.1	-9.141	-4.425	0	32.412	0.353	7.714	Protein COBRA	COBRA-like protein 4
Cellulose synthesis	COBRA	PGSC0003DMG400024530	PGSC0003DMP400042439	100	90.824	LOC107784614	XP_016461291.1	-9.235	-8.663	0.971	456.721	0.101	42.541	Protein COBRA	COBRA-like protein 4
Cellulose synthesis	COBRA	PGSC0003DMG400024530	PGSC0003DMP400042439	99	89.059	LOC107808065	XP_016488065.1	-9.235	-9.345	0.971	456.721	0.055	37.125	Protein COBRA	COBRA-like protein 4
Cellulose synthesis	COBRAs	PGSC0003DMG400025627	PGSC0003DMP400044411	98	88.397	LOC107795105	XP_016473177.1	non-DEG	-1.043	76.753	60.386	4.439	9.242	Protein COBRA	COBRA-like protein 7
Cellulose synthesis	COBRAs	PGSC0003DMG400026565	PGSC0003DMP400046166	97	92.929	LOC107820798	XP_016502626.1	non-DEG	-1.695	42.249	106.412	10.857	35.387	Protein COBRA	protein COBRA-like
Cellulose synthesis	COBRAs	PGSC0003DMG400026565	PGSC0003DMP400046166	100	90.929	LOC107800930	XP_016479686.1	non-DEG	-1.781	42.249	106.412	21.687	75.107	Protein COBRA	protein COBRA-like
Cellulose synthesis	COBRAs	PGSC0003DMG400025627	PGSC0003DMP400044411	99	57.034	LOC107798157	XP_016476612.1	non-DEG	-1.846	76.753	60.386	0.226	0.818	Protein COBRA	COBRA-like protein 7
CLG degradation	Arabinofuranosidases	PGSC0003DMG400007203	PGSC0003DMP400012775	93	79.2	LOC107788380	XP_016465546.1	non-EXP	-1.654	non-EXP	non-EXP	12.166	38.548	Arabinosidase ARA-1	alpha-L-arabinofuranosidase 1-like isoform X1
CLG degradation	Arabinofuranosidases	PGSC0003DMG400007203	PGSC0003DMP400012775	93	79.04	LOC107809578	XP_016489722.1	non-EXP	-2.883	non-EXP	non-EXP	9.342	69.433	Arabinosidase ARA-1	alpha-L-arabinofuranosidase 1-like
CLG degradation	Arabinofuranosidases	PGSC0003DMG400007203	PGSC0003DMP400012775	93	81.6	LOC107799295	XP_016477871.1	non-EXP	-4.086	non-EXP	non-EXP	0.124	2.16	Arabinosidase ARA-1	alpha-L-arabinofuranosidase 1-like
CLG degradation	Endoglucanases	PGSC0003DMG401004358	PGSC0003DMP400007751	100	87.552	LOC107807181	XP_016487001.1	non-EXP	2.429	non-EXP	non-EXP	2.542	0.524	Dienelactone hydrolase family protein	endo-1,3;1,4-beta-D-glucanase-like
CLG degradation	Endoglucanases	PGSC0003DMG400022208	PGSC0003DMP400038445	99	89.623	LOC107825604	XP_016507968.1	7.115	non-EXP	30.03	0.263	non-EXP	non-EXP	Endo-1,4-beta-glucanase	endoglucanase 11-like
CLG degradation	Endoglucanases	PGSC0003DMG400016169	PGSC0003DMP400028249	97	83.819	LOC107824972	XP_016507281.1	6.619	4.155	15.333	0.274	1.419	0.067	Endo-1,4-beta-glucanase	endoglucanase 12-like
CLG degradation	Endoglucanases	PGSC0003DMG400016169	PGSC0003DMP400028249	97	84.33	LOC107763290	XP_016437253.1	6.619	3.092	15.333	0.274	1.664	0.2	Endo-1,4-beta-glucanase	endoglucanase 12-like
CLG degradation	Endoglucanases	PGSC0003DMG402004358	PGSC0003DMP400007753	100	87.395	LOC107829421	XP_016512372.1	2.842	2.944	20.934	2.709	72.392	9.575	Endo-1,3-1,4-beta-d-glucanase	endo-1,3;1,4-beta-D-glucanase-like
CLG degradation	Endoglucanases	PGSC0003DMG400039856	PGSC0003DMP400061960	99	83.404	LOC107806871	XP_016486628.1	2.499	non-DEG	19.083	4.017	1.02	0.913	Beta-glucan-elicitor receptor	probable endo-1,3(4)-beta-glucanase ARB_01444
CLG degradation	Endoglucanases	PGSC0003DMG400039856	PGSC0003DMP400061960	100	82.837	LOC107777520	XP_016453050.1	2.499	2.75	19.083	4.017	2.573	0.369	Beta-glucan-elicitor receptor	probable endo-1,3(4)-beta-glucanase ARB_01444
CLG degradation	Endoglucanases	PGSC0003DMG400018224	PGSC0003DMP400031750	97	94.343	LOC107792901	XP_016470648.1	-1.652	non-DEG	35.764	159.168	30.125	52.364	Endo-1,4-beta-glucanase	endoglucanase 25-like
CLG degradation	Endoglucanases	PGSC0003DMG400018224	PGSC0003DMP400031750	97	93.677	LOC107820555	XP_016502343.1	-1.652	-1.114	35.764	159.168	23.433	51.246	Endo-1,4-beta-glucanase	endoglucanase 25-like
CLG degradation	Endoglucanases	PGSC0003DMG402003636	PGSC0003DMP400006502	99	87.856	LOC107775257	XP_016450461.1	-2.552	5.657	0.537	4.955	2.433	0.052	Endo-1,4-beta-glucanase	endoglucanase 2-like
CLG degradation	Endoglucanases	PGSC0003DMG400030225	PGSC0003DMP400052615	58	79.545	LOC107812595	XP_016493227.1	-2.567	non-DEG	0.506	3.574	12.187	36.587	Endo-beta-1,4-D-glucanase	endoglucanase 6-like
CLG degradation	Endoglucanases	PGSC0003DMG400003124	PGSC0003DMP400005642	99	89.899	LOC107797425	XP_016475811.1	-3.253	non-DEG	0.372	5.188	2.936	3.072	Endo-1,4-beta-glucanase	endoglucanase 24-like
CLG degradation	Endoglucanases	PGSC0003DMG400018770	PGSC0003DMP400032710	100	69.312	LOC107824319	XP_016506552.1	-3.426	2.088	0.238	3.34	9.905	2.361	Beta-glucan-binding protein 4	endo-1,3(4)-beta-glucanase 2-like
CLG degradation	Endoglucanases	PGSC0003DMG400018770	PGSC0003DMP400032710	99	74.866	LOC107777521	XP_016453051.1	-3.426	1.627	0.238	3.34	23.484	7.685	Beta-glucan-binding protein 4	probable endo-1,3(4)-beta-glucanase ARB_01444 isoform X1
CLG degradation	Endoglucanases	PGSC0003DMG400018770	PGSC0003DMP400032710	99	85.714	LOC107799688	XP_016478311.1	-3.426	-2.687	0.238	3.34	0.438	2.839	Beta-glucan-binding protein 4	putative endo-1,3(4)-beta-glucanase 2
CLG degradation	Endoglucanases	PGSC0003DMG400018770	PGSC0003DMP400032710	99	85.986	LOC107801019	XP_016479769.1	-3.426	-2.887	0.238	3.34	0.536	3.997	Beta-glucan-binding protein 4	putative endo-1,3(4)-beta-glucanase 2
CLG degradation	Endoglucanases	PGSC0003DMG400003774	PGSC0003DMP400006740	99	87.238	LOC107819005	XP_016500571.1	-4.468	-3.53	3.332	102.25	5.605	64.83	Endo-1,4-beta-glucanase	endoglucanase 2-like
CLG degradation	Endoglucanases	PGSC0003DMG400012183	PGSC0003DMP400021534	99	86.974	LOC107803827	XP_016483101.1	-4.76	non-EXP	0.727	30.877	non-EXP	non-EXP	Endo-1,4-beta-glucanase	endoglucanase 18-like
CLG degradation	Endoglucanases	PGSC0003DMG400031792	PGSC0003DMP400055022	98	92.958	LOC107807087	XP_016486862.1	-4.959	-2.705	0.09	0.841	1.218	7.996	Endo-1,4-beta-glucanase	endoglucanase 17-like
CLG degradation	Endoglucanases	PGSC0003DMG401000668	PGSC0003DMP400001315	93	89.583	LOC107803045	XP_016482129.1	-5.904	-2.024	0	1.666	1.201	4.892	Glycosyl hydrolase family 9	endoglucanase 11-like
CLG degradation	Endoglucanases	PGSC0003DMG401000668	PGSC0003DMP400001315	92	89.583	LOC107804089	XP_016483392.1	-5.904	-2.38	0	1.666	1.023	5.336	Glycosyl hydrolase family 9	endoglucanase 11-like
CLG degradation	Endoglucanases	PGSC0003DMG400012288	PGSC0003DMP400021750	99	92.48	LOC107812595	XP_016493227.1	-6.148	non-DEG	1.027	83.289	12.187	36.587	Endo-beta-1,4-D-glucanase	endoglucanase 6-like
CLG degradation	Endoglucanases	PGSC0003DMG400012288	PGSC0003DMP400021750	99	80.806	LOC107770096	XP_016444846.1	-6.148	-3.118	1.027	83.289	1.239	10.712	Endo-beta-1,4-D-glucanase	endoglucanase 6-like
CLG degradation	Endoglucanases	PGSC0003DMG400012288	PGSC0003DMP400021750	99	80.696	LOC107807143	XP_016486958.1	-6.148	-3.218	1.027	83.289	2.249	21.043	Endo-beta-1,4-D-glucanase	endoglucanase 6-like
CLG degradation	Endoglucanases	PGSC0003DMG400004992	PGSC0003DMP400008898	99	75.902	LOC107770096	XP_016444846.1	-6.673	-3.118	0.089	11.256	1.239	10.712	Endo-beta-1,4-glucanase	endoglucanase 6-like
CLG degradation	Endoglucanases	PGSC0003DMG400013523	PGSC0003DMP400023924	99	94.643	LOC107811383	XP_016491788.1	-6.857	non-EXP	4.878	748.144	non-EXP	non-EXP	Endo-1,4-beta-glucanase	endoglucanase 25-like
CLG degradation	Endoglucanases	PGSC0003DMG400013523	PGSC0003DMP400023924	100	94.481	LOC107807901	XP_016487841.1	-6.857	-3.182	4.878	748.144	17.101	156.365	Endo-1,4-beta-glucanase	endoglucanase 25-like
CLG degradation	Endoglucanases	PGSC0003DMG400008938	PGSC0003DMP400015724	99	92.371	LOC107774012	XP_016448941.1	-7.527	-3.254	0.112	41.93	2.876	27.486	Endo-1,4-beta-glucanase	endoglucanase 8-like
CLG degradation	Endoglucanases	PGSC0003DMG400008413	PGSC0003DMP400014770	99	90.554	LOC107790024	XP_016467406.1	-7.724	-1.758	0.504	54.733	2.843	9.683	Endo-1,4-beta-D-glucanase	endoglucanase 9-like
CLG degradation	Endoglucanases	PGSC0003DMG400008413	PGSC0003DMP400014770	99	90.408	LOC107817306	XP_016498594.1	-7.724	-2.394	0.504	54.733	1.039	5.519	Endo-1,4-beta-D-glucanase	endoglucanase 3-like
CLG degradation	Glucosidases	PGSC0003DMG400013135	PGSC0003DMP400023253	99	84.936	LOC107810849	XP_016491165.1	non-EXP	1.411	non-EXP	non-EXP	1.425	0.543	Beta-D-glucan exohydrolase	beta-glucosidase BoGH3B-like
CLG degradation	Glucosidases	PGSC0003DMG400027240	PGSC0003DMP400047341	99	90.779	LOC107774577	XP_016449639.1	non-DEG	-1.008	6.946	8.116	3.042	6.168	Hydrolase, hydrolyzing O-glycosyl compounds	beta-glucosidase BoGH3B-like
CLG degradation	Glucosidases	PGSC0003DMG400005943	PGSC0003DMP400010545	99	92.569	LOC107794849	XP_016472873.1	non-DEG	-2.093	14.323	10.669	3.777	16.226	Hydrolase, hydrolyzing O-glycosyl compounds	beta-glucosidase BoGH3B-like
CLG degradation	Glucosidases	PGSC0003DMG400005943	PGSC0003DMP400010545	99	92.892	LOC107784216	XP_016460785.1	non-DEG	-3.656	14.323	10.669	0.681	8.633	Hydrolase, hydrolyzing O-glycosyl compounds	beta-glucosidase BoGH3B-like
CLG degradation	Glucosidases	PGSC0003DMG400008553	PGSC0003DMP400015021	100	86.888	LOC107812101	XP_016492619.1	2.145	8.641	28.638	7.258	119.022	0.299	Cellulase containing protein	probable glucan 1,3-beta-glucosidase A
CLG degradation	Glucosidases	PGSC0003DMG400008553	PGSC0003DMP400015021	100	87.524	LOC107820222	XP_016501952.1	2.145	5.575	28.638	7.258	56.854	1.18	Cellulase containing protein	probable glucan 1,3-beta-glucosidase A isoform X1
CLG degradation	Glucosidases	PGSC0003DMG400027520	PGSC0003DMP400047848	99	89.274	LOC107822434	XP_016504470.1	-1.501	non-DEG	2.936	6.288	1.258	2.274	Periplasmic beta-glucosidase	beta-glucosidase BoGH3B-like
CLG degradation	Glucosidases	PGSC0003DMG400003013	PGSC0003DMP400005427	99	92.492	LOC107819408	XP_016501003.1	-2.456	non-EXP	4.37	47.43	non-EXP	non-EXP	Beta-D-glucan exohydrolase	beta-glucosidase BoGH3B-like
CLG degradation	Glucosidases	PGSC0003DMG400003013	PGSC0003DMP400005427	99	92.492	LOC107819408	XP_016501000.1	-2.456	-1.208	4.37	47.43	42.457	98.141	Beta-D-glucan exohydrolase	beta-glucosidase BoGH3B-like
CLG degradation	Mannosidases	PGSC0003DMG400013275	PGSC0003DMP400023477	87	90.306	LOC107777847	XP_016453483.1	non-EXP	-1.868	non-EXP	non-EXP	0.689	2.512	Hydrolase, hydrolyzing O-glycosyl compounds	mannan endo-1,4-beta-mannosidase 6-like
CLG degradation	Mannosidases	PGSC0003DMG400003695	PGSC0003DMP400006590	90	80.688	LOC107777916	XP_016453573.1	non-EXP	-3.38	non-EXP	non-EXP	0.159	1.743	Endo-1,4-beta-mannosidase protein 1	mannan endo-1,4-beta-mannosidase 7-like
CLG degradation	Mannosidases	PGSC0003DMG400013146	PGSC0003DMP400023267	99	92.117	LOC107807635	XP_016487549.1	-2.723	non-EXP	6.608	33.419	non-EXP	non-EXP	Endo-beta-mannanase	mannan endo-1,4-beta-mannosidase 2-like
CLG degradation	Mannosidases	PGSC0003DMG400018338	PGSC0003DMP400031957	99	93.85	LOC107792185	XP_016469865.1	-3.267	-1.877	5.432	35.769	5.218	19.255	Endo-beta-mannanase	mannan endo-1,4-beta-mannosidase 2-like
CLG degradation	Mannosidases	PGSC0003DMG400018338	PGSC0003DMP400031957	99	93.85	LOC107810100	XP_016490324.1	-3.267	-1.913	5.432	35.769	9.76	36.94	Endo-beta-mannanase	mannan endo-1,4-beta-mannosidase 2-like
CLG degradation	Mannosidases	PGSC0003DMG400003521	PGSC0003DMP400006274	99	90.092	LOC107769274	XP_016443967.1	-5.991	-2.787	0.194	12.431	4.131	28.35	Endo-beta-mannanase	mannan endo-1,4-beta-mannosidase 7-like
CLG degradation	Mannosidases	PGSC0003DMG400003521	PGSC0003DMP400006274	100	90.092	LOC107783846	XP_016460358.1	-5.991	-4.326	0.194	12.431	1.099	22.173	Endo-beta-mannanase	mannan endo-1,4-beta-mannosidase 7-like
CLG degradation	Mannosidases	PGSC0003DMG400031221	PGSC0003DMP400054405	99	85.333	LOC107779555	XP_016455491.1	-6.433	non-EXP	3.149	483.41	non-EXP	non-EXP	Hydrolase, hydrolyzing O-glycosyl compounds	mannan endo-1,4-beta-mannosidase 6-like isoform X2
CLG degradation	Mannosidases	PGSC0003DMG400031221	PGSC0003DMP400054405	85	89.563	LOC107779555	XP_016455490.1	-6.433	-3.737	3.149	483.41	0.891	11.992	Hydrolase, hydrolyzing O-glycosyl compounds	mannan endo-1,4-beta-mannosidase 6-like isoform X1
CLG degradation	Mannosidases	PGSC0003DMG400031221	PGSC0003DMP400054405	93	89.806	LOC107761831	XP_016435604.1	-6.433	-6.168	3.149	483.41	0.401	29.132	Hydrolase, hydrolyzing O-glycosyl compounds	mannan endo-1,4-beta-mannosidase 6-like isoform X2
CLG degradation	XTH	PGSC0003DMG400031101	PGSC0003DMP400054172	90	90.775	LOC107781642	XP_016457864.1	non-EXP	2.495	non-EXP	non-EXP	20.337	3.681	Xyloglucan endotransglycosylase	xyloglucan endotransglucosylase/hydrolase 2-like
CLG degradation	XTH	PGSC0003DMG400024060	PGSC0003DMP400041625	99	92.203	LOC107783320	XP_016459778.1	non-EXP	-2.375	non-EXP	non-EXP	7.471	39.097	Xyloglucan endotransglucosylase/hydrolase protein A	probable xyloglucan endotransglucosylase/hydrolase protein 8
CLG degradation	XTH	PGSC0003DMG400005127	PGSC0003DMP400009102	55	80.745	LOC107785210	XP_016461936.1	non-EXP	-2.538	non-EXP	non-EXP	0.306	1.768	Xyloglucan endotransglucosylase/hydrolase protein A	probable xyloglucan endotransglucosylase/hydrolase protein 10
CLG degradation	XTH	PGSC0003DMG400002084	PGSC0003DMP400003742	100	86.957	LOC107819359	XP_016500956.1	non-EXP	-2.555	non-EXP	non-EXP	0.298	1.747	Xyloglucan endotransglucosylase/hydrolase protein A	probable xyloglucan endotransglucosylase/hydrolase protein 8
CLG degradation	XTH	PGSC0003DMG400024060	PGSC0003DMP400041625	99	93.22	LOC107791643	XP_016469224.1	non-EXP	-3.72	non-EXP	non-EXP	1.396	18.518	Xyloglucan endotransglucosylase/hydrolase protein A	probable xyloglucan endotransglucosylase/hydrolase protein 8
CLG degradation	XTH	PGSC0003DMG400005127	PGSC0003DMP400009102	55	81.875	LOC107768383	XP_016442995.1	non-EXP	-6.295	non-EXP	non-EXP	0.041	3.277	Xyloglucan endotransglucosylase/hydrolase protein A	probable xyloglucan endotransglucosylase/hydrolase protein 10
CLG degradation	XTH	PGSC0003DMG400001809	PGSC0003DMP400003240	100	90.058	LOC107763397	XP_016437377.1	non-DEG	4.978	122.432	71.526	411.784	13.153	Xyloglucan endotransglucosylase-hydrolase XTH5	probable xyloglucan endotransglucosylase/hydrolase protein 30
CLG degradation	XTH	PGSC0003DMG400001809	PGSC0003DMP400003240	100	87.791	LOC107762311	XP_016436143.1	non-DEG	4.959	122.432	71.526	327.484	10.651	Xyloglucan endotransglucosylase-hydrolase XTH5	probable xyloglucan endotransglucosylase/hydrolase protein 30
CLG degradation	XTH	PGSC0003DMG400013975	PGSC0003DMP400024633	96	90.637	LOC107794227	XP_016472192.1	non-DEG	4.198	53.35	41.45	38.795	2.072	Xyloglucan endotransglycosylase/hydrolase XTH-6	probable xyloglucan endotransglucosylase/hydrolase protein 23 isoform X1
CLG degradation	XTH	PGSC0003DMG400013975	PGSC0003DMP400024633	96	90.637	LOC107786882	XP_016463875.1	non-DEG	3.268	53.35	41.45	18.789	1.909	Xyloglucan endotransglycosylase/hydrolase XTH-6	probable xyloglucan endotransglucosylase/hydrolase protein 23
CLG degradation	XTH	PGSC0003DMG400029503	PGSC0003DMP400051393	100	88.182	LOC107815234	XP_016496275.1	non-DEG	1.077	12.709	10.975	60.595	28.962	ETAG-A3	probable xyloglucan endotransglucosylase/hydrolase protein 27
CLG degradation	XTH	PGSC0003DMG402018740	PGSC0003DMP400032663	100	86.897	LOC107813936	XP_016494747.1	non-DEG	-2.429	5.279	1.439	1.56	8.504	Xyloglucan endotransglucosylase/hydrolase 9	xyloglucan endotransglucosylase/hydrolase protein 24-like
CLG degradation	XTH	PGSC0003DMG402018740	PGSC0003DMP400032663	100	87.108	LOC107803969	XP_016483257.1	non-DEG	-3.576	5.279	1.439	2.145	25.755	Xyloglucan endotransglucosylase/hydrolase 9	xyloglucan endotransglucosylase/hydrolase protein 24-like
CLG degradation	XTH	PGSC0003DMG400031101	PGSC0003DMP400054168	99	88.889	LOC107781642	XP_016457864.1	3.48	2.495	87.836	8.343	20.337	3.681	Xyloglucan endotransglycosylase	xyloglucan endotransglucosylase/hydrolase 2-like
CLG degradation	XTH	PGSC0003DMG400017299	PGSC0003DMP400030226	99	87.153	LOC107781642	XP_016457864.1	2.229	2.495	88.12	19.994	20.337	3.681	Xyloglucan endotransglycosylase	xyloglucan endotransglucosylase/hydrolase 2-like
CLG degradation	XTH	PGSC0003DMG400002309	PGSC0003DMP400004123	99	88.144	LOC107781642	XP_016457864.1	2	2.495	4.702	1.174	20.337	3.681	Xyloglucan endo-transglycosylase	xyloglucan endotransglucosylase/hydrolase 2-like
CLG degradation	XTH	PGSC0003DMG400021877	PGSC0003DMP400037893	97	93.284	LOC107778234	XP_016453928.1	-2.074	non-DEG	9.927	6.274	187.092	226.56	Xyloglucan endo-transglycosylase	xyloglucan endotransglucosylase/hydrolase 2-like
CLG degradation	XTH	PGSC0003DMG400007854	PGSC0003DMP400013842	95	93.818	LOC107789124	XP_016466378.1	-2.163	-4.987	0.683	2.646	0.264	8.434	Xyloglucan endotransglucosylase-hydrolase XTH9	xyloglucan endotransglucosylase/hydrolase 2-like
CLG degradation	XTH	PGSC0003DMG400007854	PGSC0003DMP400013842	95	93.818	LOC107763987	XP_016437997.1	-2.163	-5.325	0.683	2.646	0.395	15.95	Xyloglucan endotransglucosylase-hydrolase XTH9	xyloglucan endotransglucosylase/hydrolase 2-like
CLG degradation	XTH	PGSC0003DMG400022791	PGSC0003DMP400039518	100	88.623	LOC107809788	XP_016489964.1	-2.896	-1.241	2.805	14.166	32.601	77.846	Xyloglucan endotransglucosylase/hydrolase 13	probable xyloglucan endotransglucosylase/hydrolase protein 28
CLG degradation	XTH	PGSC0003DMG400022791	PGSC0003DMP400039518	100	88.323	LOC107805952	XP_016485544.1	-2.896	-1.64	2.805	14.166	27.107	85.388	Xyloglucan endotransglucosylase/hydrolase 13	probable xyloglucan endotransglucosylase/hydrolase protein 28
CLG degradation	XTH	PGSC0003DMG400026189	PGSC0003DMP400045445	98	85.517	LOC107800334	XP_016478975.1	-4.38	-1.891	16.73	116.88	29.823	112.648	Xyloglucan endotransglycosylase/hydrolase 16 protein	xyloglucan endotransglucosylase/hydrolase protein 9-like
CLG degradation	XTH	PGSC0003DMG400026189	PGSC0003DMP400045445	94	87.189	LOC107787957	XP_016465066.1	-4.38	-3.16	16.73	116.88	8.389	75.853	Xyloglucan endotransglycosylase/hydrolase 16 protein	xyloglucan endotransglucosylase/hydrolase protein 9-like
CLG degradation	XTH	PGSC0003DMG400007794	PGSC0003DMP400013723	99	91.753	LOC107789124	XP_016466378.1	-4.893	-4.987	0.058	2.188	0.264	8.434	Xyloglucan endotransglucosylase-hydrolase XTH9	xyloglucan endotransglucosylase/hydrolase 2-like
CLG degradation	XTH	PGSC0003DMG400024755	PGSC0003DMP400042888	99	92.491	LOC107785465	XP_016462269.1	-6.067	-4.019	6.137	475.13	27.265	440.282	Xyloglucan endotransglucosylase/hydrolase 1	probable xyloglucan endotransglucosylase/hydrolase protein
CLG degradation	XTH	PGSC0003DMG400024755	PGSC0003DMP400042888	99	93.174	LOC107768220	XP_016442808.1	-6.067	-4.356	6.137	475.13	25.172	513.808	Xyloglucan endotransglucosylase/hydrolase 1	probable xyloglucan endotransglucosylase/hydrolase protein
CLG degradation	XTH	PGSC0003DMG400021398	PGSC0003DMP400037085	99	89.041	LOC107794176	XP_016472127.1	-6.568	-2.778	0.452	30.838	10.157	70.099	Xyloglucan endotransglucosylase-hydrolase XTH7	probable xyloglucan endotransglucosylase/hydrolase protein 7
CLG degradation	XTH	PGSC0003DMG400021398	PGSC0003DMP400037085	100	88.356	LOC107825008	XP_016507323.1	-6.568	-3.109	0.452	30.838	9.243	80.099	Xyloglucan endotransglucosylase-hydrolase XTH7	probable xyloglucan endotransglucosylase/hydrolase protein 7
CLG degradation	XTH	PGSC0003DMG400021398	PGSC0003DMP400037085	100	90.169	LOC107800268	XP_016478902.1	-6.568	-5.522	0.452	30.838	3.651	168.126	Xyloglucan endotransglucosylase-hydrolase XTH7	probable xyloglucan endotransglucosylase/hydrolase protein 6
CLG degradation	XTH	PGSC0003DMG400021398	PGSC0003DMP400037085	99	90.508	LOC107819631	XP_016501246.1	-6.568	-7.626	0.452	30.838	2.507	498.256	Xyloglucan endotransglucosylase-hydrolase XTH7	probable xyloglucan endotransglucosylase/hydrolase protein 7
CLG degradation	XTH	PGSC0003DMG400003866	PGSC0003DMP400006870	95	92.958	LOC107805355	XP_016484875.1	-6.585	non-DEG	0.13	9	10.625	32.884	Xyloglucan endotransglucosylase/hydrolase 12	probable xyloglucan endotransglucosylase/hydrolase protein 32
CLG degradation	XTH	PGSC0003DMG400004109	PGSC0003DMP400007341	99	85.093	LOC107789579	XP_016466905.1	-7.26	1.918	0.618	1.458	2.329	0.636	Xyloglucan endotransglycosylase hydrolase	probable xyloglucan endotransglucosylase/hydrolase protein 33
CLG degradation	XTH	PGSC0003DMG400000408	PGSC0003DMP400000796	94	91.007	LOC107817239	XP_016498521.1	-7.702	-3.403	0.178	49.172	2.075	22.266	Xyloglucan endotransglucosylase-hydrolase XTH6	xyloglucan endotransglucosylase/hydrolase protein 31-like
CLG degradation	XTH	PGSC0003DMG400000408	PGSC0003DMP400000796	94	89.209	LOC107815673	XP_016496781.1	-7.702	-4.527	0.178	49.172	1.103	25.826	Xyloglucan endotransglucosylase-hydrolase XTH6	xyloglucan endotransglucosylase/hydrolase protein 31-like
CLG degradation	Xylosidases/xylanases	PGSC0003DMG402011539	PGSC0003DMP400020475	78	23.019	LOC107767224	XP_016441631.1	non-EXP	-2.352	non-EXP	non-EXP	0.607	3.152	Xylanase Xyn1	uncharacterized protein LOC107767224
CLG degradation	Xylosidases/xylanases	PGSC0003DMG400008420	PGSC0003DMP400014781	67	91.957	LOC107810757	XP_016491065.1	non-EXP	-3.497	non-EXP	non-EXP	0.335	3.871	Endo-1,4-beta-xylanase A	exoglucanase/xylanase-like
CLG degradation	Xylosidases/xylanases	PGSC0003DMG400008420	PGSC0003DMP400014781	67	91.689	LOC107823403	XP_016505523.1	non-EXP	-4.818	non-EXP	non-EXP	0.213	6.133	Endo-1,4-beta-xylanase A	exoglucanase/xylanase-like isoform X1
CLG degradation	Xylosidases/xylanases	PGSC0003DMG402011539	PGSC0003DMP400020474	99	86.393	LOC107814145	XP_016494973.1	1.006	non-EXP	20.244	14.648	non-EXP	non-EXP	Xylanase Xyn1	uncharacterized protein LOC107814145 isoform X2
CLG degradation	Xylosidases/xylanases	PGSC0003DMG400022933	PGSC0003DMP400039774	99	85.438	LOC107818832	XP_016500372.1	-1.251	1.799	10.32	47.343	28.818	8.374	Auxin-induced beta-glucosidase	beta-D-xylosidase 1-like
CLG degradation	Xylosidases/xylanases	PGSC0003DMG400014540	PGSC0003DMP400025612	99	88.387	LOC107771561	XP_016446448.1	-2.598	non-DEG	2.247	14.601	5.201	9.955	Alpha-glucosidase	alpha-xylosidase 1-like
CLG degradation	Xylosidases/xylanases	PGSC0003DMG400014540	PGSC0003DMP400025612	99	88.274	LOC107800803	XP_016479523.1	-2.598	-1.529	2.247	14.601	2.379	6.94	Alpha-glucosidase	alpha-xylosidase 1-like
CLG degradation	Xylosidases/xylanases	PGSC0003DMG400015881	PGSC0003DMP400027836	99	87.742	LOC107815276	XP_016496324.1	-4.88	non-DEG	0.029	1.375	0.988	1.805	Alpha-glucosidase	alpha-xylosidase 1-like
CLG degradation	Xylosidases/xylanases	PGSC0003DMG400008420	PGSC0003DMP400014780	98	92.204	LOC107810757	XP_016491067.1	-5.139	non-EXP	0.024	3.171	non-EXP	non-EXP	Endo-1,4-beta-xylanase A	exoglucanase/xylanase-like
CLG degradation	Xylosidases/xylanases	PGSC0003DMG400009484	PGSC0003DMP400016778	99	87.242	LOC107791565	XP_016469137.1	-5.292	-4.141	1.639	57.095	2.726	48.269	Periplasmic beta-glucosidase	probable beta-D-xylosidase 7
CLG degradation	Xylosidases/xylanases	PGSC0003DMG400009484	PGSC0003DMP400016778	100	86.822	LOC107776309	XP_016451673.1	-5.292	-4.872	1.639	57.095	0.582	17.218	Periplasmic beta-glucosidase	probable beta-D-xylosidase 7
CLG degradation	Xylosidases/xylanases	PGSC0003DMG400029738	PGSC0003DMP400051807	80	88.782	LOC107816752	XP_016497975.1	-5.774	-1.274	0.986	56.466	38.915	94.988	LEXYL2 protein	beta-xylosidase/alpha-L-arabinofuranosidase 2-like
CLG degradation	Xylosidases/xylanases	PGSC0003DMG400029738	PGSC0003DMP400051807	80	89.263	LOC107830518	XP_016513596.1	-5.774	-1.491	0.986	56.466	17.73	50.137	LEXYL2 protein	beta-xylosidase/alpha-L-arabinofuranosidase 2-like
CLG degradation	Xylosidases/xylanases	PGSC0003DMG400029738	PGSC0003DMP400051807	80	80.547	LOC107767521	XP_016442039.1	-5.774	-4.399	0.986	56.466	0.426	9.088	LEXYL2 protein	beta-xylosidase/alpha-L-arabinofuranosidase 2-like
CLG degradation	Xylosidases/xylanases	PGSC0003DMG400029738	PGSC0003DMP400051807	79	80.707	LOC107764751	XP_016438839.1	-5.774	-5.664	0.986	56.466	0.396	20.261	LEXYL2 protein	beta-xylosidase/alpha-L-arabinofuranosidase 2-like
CLG degradation	Xylosidases/xylanases	PGSC0003DMG400004955	PGSC0003DMP400008830	100	89.545	LOC107799765	XP_016478395.1	-6.125	-5.19	1.257	165.893	0.486	17.901	Xylanase Xyn2	endo-1,4-beta-xylanase A-like
CLG degradation	Xylosidases/xylanases	PGSC0003DMG400004955	PGSC0003DMP400008830	99	89.545	LOC107767219	XP_016441624.1	-6.125	-6.535	1.257	165.893	0.309	28.836	Xylanase Xyn2	endo-1,4-beta-xylanase A-like
CLG degradation	Xylosidases/xylanases	PGSC0003DMG401009485	PGSC0003DMP400016779	100	87.5	LOC107776310	XP_016451674.1	-7.731	-1.722	0	0.728	0.461	1.531	Periplasmic beta-glucosidase	probable beta-D-xylosidase 7
CLG degradation	Xylosidases/xylanases	PGSC0003DMG401009485	PGSC0003DMP400016779	99	86.856	LOC107770068	XP_016444820.1	-7.731	-3.147	0	0.728	0.194	1.719	Periplasmic beta-glucosidase	probable beta-D-xylosidase 7
CLG degradation	Xylosidases/xylanases	PGSC0003DMG400009036	PGSC0003DMP400015895	99	88.645	LOC107781973	XP_016458273.1	-7.853	non-DEG	0.037	16.608	64.534	33.468	Beta-glucosidase	probable beta-D-xylosidase 2
CLG degradation	Xylosidases/xylanases	PGSC0003DMG400009036	PGSC0003DMP400015895	100	89.032	LOC107810773	XP_016491081.1	-7.853	-4.442	0.037	16.608	0.782	17.163	Beta-glucosidase	probable beta-D-xylosidase 2
CLG degradation	Xylosidases/xylanases	PGSC0003DMG400009036	PGSC0003DMP400015895	94	52.972	LOC107815484	XP_016496552.1	-7.853	-4.906	0.037	16.608	0.348	10.621	Beta-glucosidase	probable beta-D-xylosidase 5
CLG degradation	Xylosidases/xylanases	PGSC0003DMG400009036	PGSC0003DMP400015895	96	49.874	LOC107820286	XP_016502031.1	-7.853	-8.761	0.037	16.608	0.011	5.824	Beta-glucosidase	probable beta-D-xylosidase 5 isoform X1
CLG degradation	Xylosidases/xylanases	PGSC0003DMG402009485	PGSC0003DMP400016780	99	84.278	LOC107770068	XP_016444820.1	-10.112	-3.147	0	3.754	0.194	1.719	Periplasmic beta-glucosidase	probable beta-D-xylosidase 7
CLG synthesis	CSL	PGSC0003DMG400017110	PGSC0003DMP400029900	99	82.353	LOC107796039	XP_016474240.1	non-EXP	5.986	non-EXP	non-EXP	15.355	0.228	Conserved gene of unknown function	cellulose synthase-like protein H1
CLG synthesis	CSL	PGSC0003DMG400017110	PGSC0003DMP400029900	100	81.867	LOC107786528	XP_016463503.1	non-EXP	2.602	non-EXP	non-EXP	7.066	1.197	Conserved gene of unknown function	cellulose synthase-like protein H1
CLG synthesis	CSL	PGSC0003DMG400027343	PGSC0003DMP400047543	99	79.278	LOC107764014	XP_016438024.1	non-EXP	-6.17	non-EXP	non-EXP	0.098	7.323	Cellulose synthase-like A1	glucomannan 4-beta-mannosyltransferase 9-like
CLG synthesis	CSL	PGSC0003DMG400027343	PGSC0003DMP400047543	99	79.278	LOC107803587	XP_016482818.1	non-EXP	-8.263	non-EXP	non-EXP	0.069	22.176	Cellulose synthase-like A1	glucomannan 4-beta-mannosyltransferase 9-like
CLG synthesis	CSL	PGSC0003DMG400017257	PGSC0003DMP400030161	89	88.752	LOC107802764	XP_016481809.1	non-DEG	6.922	2.863	1.363	5.646	0.062	Cellulose synthase	cellulose synthase-like protein G3
CLG synthesis	CSL	PGSC0003DMG400012852	PGSC0003DMP400022763	99	58.14	LOC107797779	XP_016476186.1	7.736	non-DEG	22.699	0.331	0.633	0.63	Cellulose synthase CslG	cellulose synthase-like protein G3
CLG synthesis	CSL	PGSC0003DMG400011752	PGSC0003DMP400020836	92	85.474	LOC107779036	XP_016454863.1	5.204	non-EXP	1.655	0.048	non-EXP	non-EXP	Cellulose synthase	cellulose synthase-like protein G2
CLG synthesis	CSL	PGSC0003DMG400011752	PGSC0003DMP400020836	100	83.333	LOC107795876	XP_016474069.1	5.204	-8.722	1.655	0.048	0	1.274	Cellulose synthase	cellulose synthase-like protein D4
CLG synthesis	CSL	PGSC0003DMG400013398	PGSC0003DMP400023709	99	78.89	LOC107788647	XP_016465828.1	3.456	non-DEG	20.395	2.582	3.014	1.751	Cellulose synthase	cellulose synthase-like protein G2
CLG synthesis	CSL	PGSC0003DMG400010049	PGSC0003DMP400017778	99	91.867	LOC107817590	XP_016498929.1	1.836	non-DEG	184.906	31.605	7.403	19.112	Transferase, transferring glycosyl groups	xyloglucan glycosyltransferase 4-like
CLG synthesis	CSL	PGSC0003DMG400029792	PGSC0003DMP400051900	99	84.06	LOC107787706	XP_016464798.1	1.704	non-DEG	16.593	5.133	10.887	5.491	Cellulose synthase CslE	cellulose synthase-like protein E6
CLG synthesis	CSL	PGSC0003DMG402022167	PGSC0003DMP400038334	99	82.81	LOC107803670	XP_016482925.1	1.128	non-DEG	43.219	22.79	18.266	6.627	Cellulose synthase	cellulose synthase-like protein E1
CLG synthesis	CSL	PGSC0003DMG400045075	PGSC0003DMP400067179	96	87.942	LOC107809757	XP_016489917.1	-1.69	non-EXP	2.009	10.192	non-EXP	non-EXP	Xyloglucan glycosyltransferase 6	probable xyloglucan glycosyltransferase 6
CLG synthesis	CSL	PGSC0003DMG400002722	PGSC0003DMP400004895	99	93.246	LOC107792075	XP_016469749.1	-3.029	-3.85	0.316	5.92	0.476	6.925	Cellulose synthase-like A1	glucomannan 4-beta-mannosyltransferase 9-like
CLG synthesis	CSL	PGSC0003DMG400002722	PGSC0003DMP400004895	100	92.871	LOC107826337	XP_016508785.1	-3.029	-4.739	0.316	5.92	0.204	5.576	Cellulose synthase-like A1	glucomannan 4-beta-mannosyltransferase 9-like
CLG synthesis	CSL	PGSC0003DMG401003156	PGSC0003DMP400005705	99	94.908	LOC107805552	XP_016485100.1	-3.077	non-DEG	13.034	83.756	9.622	11.248	Glycosyltransferase, CAZy family GT2	cellulose synthase-like protein D3
CLG synthesis	CSL	PGSC0003DMG400007150	PGSC0003DMP400012679	99	95.31	LOC107775476	XP_016450698.1	-3.237	non-DEG	0.573	5.137	6.138	5.214	UPA15	glucomannan 4-beta-mannosyltransferase 2-like
CLG synthesis	CSL	PGSC0003DMG400004943	PGSC0003DMP400008796	99	88.949	LOC107791107	XP_016468590.1	-4.27	-2.437	2.078	29.877	2.453	13.352	Transferase, transferring glycosyl groups	probable xyloglucan glycosyltransferase 12
CLG synthesis	CSL	PGSC0003DMG400004943	PGSC0003DMP400008796	100	88.544	LOC107764527	XP_016438603.1	-4.27	-2.674	2.078	29.877	2.114	13.587	Transferase, transferring glycosyl groups	probable xyloglucan glycosyltransferase 12
CLG synthesis	CSL	PGSC0003DMG400009536	PGSC0003DMP400016846	99	94.813	LOC107813103	XP_016493803.1	-5.253	-3.133	0.341	9.355	1.354	11.981	Transferase, transferring glycosyl groups	probable xyloglucan glycosyltransferase 5
CLG synthesis	CSL	PGSC0003DMG400009536	PGSC0003DMP400016846	100	94.524	LOC107764156	XP_016438181.1	-5.253	-3.786	0.341	9.355	0.536	7.435	Transferase, transferring glycosyl groups	probable xyloglucan glycosyltransferase 5
CLG synthesis	CSL	PGSC0003DMG400026523	PGSC0003DMP400046084	99	94.455	LOC107794352	XP_016472317.1	-5.602	-1.92	1.102	90.285	9.219	34.897	UPA15	glucomannan 4-beta-mannosyltransferase 2-like
CLG synthesis	CSL	PGSC0003DMG400026523	PGSC0003DMP400046084	99	94.646	LOC107792376	XP_016470073.1	-5.602	-1.985	1.102	90.285	10.92	43.226	UPA15	glucomannan 4-beta-mannosyltransferase 2-like
CLG synthesis	CSL	PGSC0003DMG400028267	PGSC0003DMP400049143	100	92.495	LOC107823522	XP_016505665.1	-6.932	-4.362	0.529	68.913	0.453	9.381	Cellulose synthase-like A1	glucomannan 4-beta-mannosyltransferase 9-like
CLG synthesis	CSL	PGSC0003DMG400028267	PGSC0003DMP400049143	100	91.557	LOC107806836	XP_016486574.1	-6.932	-5.677	0.529	68.913	0.536	27.808	Cellulose synthase-like A1	glucomannan 4-beta-mannosyltransferase 9-like
CLG synthesis	CSL	PGSC0003DMG400031800	PGSC0003DMP400055037	99	93.379	LOC107781415	XP_016457601.1	-7.705	non-DEG	0.043	4.234	1.619	8.224	Cellulose synthase A catalytic subunit 3 [UDP-forming]	cellulose synthase-like protein D5
CLG synthesis	Exostosin family	PGSC0003DMG400011164	PGSC0003DMP400019732	100	77.244	LOC107803629	XP_016482878.1	non-EXP	2.788	non-EXP	non-EXP	8.672	1.29	Glycosyltransferase	probable glycosyltransferase At5g03795 isoform X1
CLG synthesis	Exostosin family	PGSC0003DMG400033138	PGSC0003DMP400055921	100	76.481	LOC107789675	XP_016467020.1	non-DEG	-1.354	1.298	1.951	0.829	2.147	Limonene cyclase	probable glycosyltransferase At3g07620
CLG synthesis	Exostosin family	PGSC0003DMG400000366	PGSC0003DMP400000730	100	80.202	LOC107766594	XP_016440892.1	non-DEG	-1.79	5.519	4.946	1.187	4.136	Exostosin family protein	probable glycosyltransferase At3g07620 isoform X1
CLG synthesis	Exostosin family	PGSC0003DMG400000366	PGSC0003DMP400000730	100	80.488	LOC107804446	XP_016483828.1	non-DEG	-2.123	5.519	4.946	0.74	3.266	Exostosin family protein	probable glycosyltransferase At3g07620 isoform X1
CLG synthesis	Exostosin family	PGSC0003DMG400003358	PGSC0003DMP400006014	99	74.414	LOC107759534	XP_016432990.1	8.53	3.776	63.402	0.157	9.084	0.668	Exostosin	probable glycosyltransferase At5g03795
CLG synthesis	Exostosin family	PGSC0003DMG400003358	PGSC0003DMP400006014	96	73.695	LOC107775342	XP_016450558.1	8.53	2.741	63.402	0.157	9.705	1.497	Exostosin	probable glycosyltransferase At5g03795
CLG synthesis	Exostosin family	PGSC0003DMG400015688	PGSC0003DMP400027521	99	73.066	LOC107809430	XP_016489551.1	3.168	2.85	43.799	6.592	9.375	1.341	Glycosyltransferase	probable glycosyltransferase At3g07620
CLG synthesis	Exostosin family	PGSC0003DMG400015688	PGSC0003DMP400027521	93	76.758	LOC107798457	XP_016476946.1	3.168	1.212	43.799	6.592	6.401	2.778	Glycosyltransferase	probable glycosyltransferase At3g07620
CLG synthesis	Exostosin family	PGSC0003DMG400017704	PGSC0003DMP400030935	99	89.691	LOC107818227	XP_016499668.1	2.582	non-EXP	4.852	0.518	non-EXP	non-EXP	EXO	probable glycosyltransferase At5g03795 isoform X2
CLG synthesis	Exostosin family	PGSC0003DMG400002237	PGSC0003DMP400003995	99	83.433	LOC107807175	XP_016486995.1	1.301	non-EXP	16.195	7.185	non-EXP	non-EXP	Exostosin family protein	probable glycosyltransferase At3g07620
CLG synthesis	Exostosin family	PGSC0003DMG400002237	PGSC0003DMP400003995	99	83.433	LOC107807175	XP_016486994.1	1.301	1.466	16.195	7.185	11.089	4.043	Exostosin family protein	probable glycosyltransferase At3g07620
CLG synthesis	Exostosin family	PGSC0003DMG400016008	PGSC0003DMP400028012	100	91.228	LOC107828078	XP_016510813.1	-1.395	-1.463	1.437	4.297	0.658	1.812	Glycosyltransferase	probable xyloglucan 6-xylosyltransferase 3
CLG synthesis	Exostosin family	PGSC0003DMG400001769	PGSC0003DMP400003161	99	82.493	LOC107764680	XP_016438769.1	-6.259	non-EXP	0.277	8.457	non-EXP	non-EXP	Beta-1,3-glucuronyltransferase	probable beta-1,4-xylosyltransferase IRX9
CLG synthesis	Exostosin family	PGSC0003DMG400001769	PGSC0003DMP400003161	100	79.284	LOC107762480	XP_016436332.1	-6.259	-6.223	0.277	8.457	0.505	38.169	Beta-1,3-glucuronyltransferase	probable beta-1,4-xylosyltransferase IRX9
CLG synthesis	Exostosin family	PGSC0003DMG400029899	PGSC0003DMP400052083	99	83.436	LOC107802225	XP_016481166.1	-7.169	non-EXP	0	4.102	non-EXP	non-EXP	Glycosyltransferase	probable glycosyltransferase At5g25310
CLG synthesis	Exostosin family	PGSC0003DMG400021437	PGSC0003DMP400037152	96	88.128	LOC107774216	XP_016449186.1	-8.953	-3.429	0.023	27.097	1.06	11.505	Gene of unknown function	putative glycosyltransferase 7
CLG synthesis	Exostosin family (IRX19-like)	PGSC0003DMG400025579	PGSC0003DMP400044342	99	84.979	LOC107760089	XP_016433595.1	-6.025	-3.086	3.261	288.067	4.237	36.167	Conserved gene of unknown function	probable beta-1,4-xylosyltransferase IRX10L
CLG synthesis	Exostosin family (IRX7-like)	PGSC0003DMG400019789	PGSC0003DMP400034383	99	84.634	LOC107785408	XP_016462201.1	1.958	non-EXP	23.494	8.453	non-EXP	non-EXP	Exostosin family protein	uncharacterized protein LOC107785408
CLG synthesis	Exostosin family (IRX7-like)	PGSC0003DMG400024814	PGSC0003DMP400043002	99	92.441	LOC107787264	XP_016464300.1	-2.093	non-DEG	2.222	15.964	6.064	7.033	Exostosin family protein	probable glucuronoxylan glucuronosyltransferase F8H
CLG synthesis	Exostosin family (MUR3-like)	PGSC0003DMG400008579	PGSC0003DMP400015074	97	88.8	LOC107832056	XP_016515345.1	1.084	non-DEG	26.732	18.158	0.413	0.756	Glycosyltransferase, CAZy family GT47	xyloglucan galactosyltransferase MUR3-like
CLG synthesis	Exostosin family (XLT2-like)	PGSC0003DMG400031015	PGSC0003DMP400054016	99	78.443	LOC107832219	XP_016515520.1	3.891	non-EXP	8.846	0.896	non-EXP	non-EXP	Xyloglucan galactosyltransferase KATAMARI1	xyloglucan galactosyltransferase XLT2
CLG synthesis	Exostosin family (XLT2-like)	PGSC0003DMG400006432	PGSC0003DMP400011408	98	87.631	LOC107796417	XP_016474663.1	-1.052	non-EXP	8.309	22.85	non-EXP	non-EXP	Xyloglucan galactosyltransferase KATAMARI1	xyloglucan galactosyltransferase XLT2-like
CLG synthesis	Exostosin family (XLT2-like)	PGSC0003DMG400006432	PGSC0003DMP400011408	97	78.834	LOC107782458	XP_016458829.1	-1.052	-1.607	8.309	22.85	15.161	46.536	Xyloglucan galactosyltransferase KATAMARI1	xyloglucan galactosyltransferase XLT2-like
CLG synthesis	Exostosin family (XLT2-like)	PGSC0003DMG400024950	PGSC0003DMP400043287	78	91.65	LOC107787058	XP_016464061.1	-2.147	-1.321	6.345	48.725	2.83	7.098	Xyloglucan galactosyltransferase KATAMARI1	xyloglucan galactosyltransferase XLT2-like
CLG synthesis	Exostosin family (XLT2-like)	PGSC0003DMG400024950	PGSC0003DMP400043287	95	92.039	LOC107782931	XP_016459366.1	-2.147	-1.407	6.345	48.725	3.57	9.469	Xyloglucan galactosyltransferase KATAMARI1	xyloglucan galactosyltransferase XLT2-like
CLG synthesis	Galactosyltransferases	PGSC0003DMG400004742	PGSC0003DMP400008403	95	93.128	LOC107808737	XP_016488790.1	non-DEG	-1.498	4.897	11.193	1.775	5.042	Exostosin family protein	probable xyloglucan galactosyltransferase GT19
CLG synthesis	Galactosyltransferases	PGSC0003DMG400004742	PGSC0003DMP400008403	95	93.128	LOC107777064	XP_016452519.1	non-DEG	-2.032	4.897	11.193	1.278	5.254	Exostosin family protein	probable xyloglucan galactosyltransferase GT19
CLG synthesis	Galactosyltransferases	PGSC0003DMG400009930	PGSC0003DMP400017533	99	87.885	LOC107823212	XP_016505312.1	-4.608	non-EXP	0.273	12.276	non-EXP	non-EXP	Conserved gene of unknown function	galactan beta-1,4-galactosyltransferase GALS1-like
CLG synthesis	Galactosyltransferases	PGSC0003DMG400009930	PGSC0003DMP400017533	97	85.897	LOC107815199	XP_016496211.1	-4.608	-2.784	0.273	12.276	0.898	6.201	Conserved gene of unknown function	galactan beta-1,4-galactosyltransferase GALS1-like
CLG synthesis	Galactosyltransferases	PGSC0003DMG400013632	PGSC0003DMP400024112	99	84.99	LOC107770814	XP_016445630.1	-5.152	-2.309	1.303	46.475	2.094	10.431	Conserved gene of unknown function	galactan beta-1,4-galactosyltransferase GALS3-like
CLG synthesis	Galactosyltransferases	PGSC0003DMG400013632	PGSC0003DMP400024112	99	84.766	LOC107801752	XP_016480620.1	-5.152	-3.031	1.303	46.475	1.124	9.251	Conserved gene of unknown function	galactan beta-1,4-galactosyltransferase GALS3-like
CLG synthesis	Galactosyltransferases	PGSC0003DMG400011286	PGSC0003DMP400019987	100	84.418	LOC107812736	XP_016493382.1	-7.997	-4.119	0.109	12.769	0.859	15.067	Conserved gene of unknown function	galactan beta-1,4-galactosyltransferase GALS3-like
CLG synthesis	Galactosyltransferases	PGSC0003DMG400011286	PGSC0003DMP400019987	100	83.432	LOC107804857	XP_016484280.1	-7.997	-4.34	0.109	12.769	0.355	7.273	Conserved gene of unknown function	galactan beta-1,4-galactosyltransferase GALS3-like
CLG synthesis	Glucuronosyltransferases	PGSC0003DMG400011872	PGSC0003DMP400021043	100	87.5	LOC107819963	XP_016501647.1	1.589	-2.086	70.558	39.373	0.372	1.612	Glucosyltransferase	putative glucuronosyltransferase PGSIP8
CLG synthesis	Glucuronosyltransferases	PGSC0003DMG400004758	PGSC0003DMP400008436	97	90.85	LOC107777746	XP_016453360.1	-2.392	-2.438	0.505	5.553	1.175	6.426	Glucosyltransferase	putative glucuronosyltransferase PGSIP8
CLG synthesis	Glucuronosyltransferases	PGSC0003DMG400004758	PGSC0003DMP400008436	97	92.157	LOC107778538	XP_016454305.1	-2.392	-4.403	0.505	5.553	0.203	4.445	Glucosyltransferase	putative glucuronosyltransferase PGSIP8
CLG synthesis	Other	PGSC0003DMG400024800	PGSC0003DMP400042973	99	64.184	LOC107792199	XP_016469876.1	non-DEG	-2.347	37.172	62.636	4.345	22.404	Glycogenin	UDP-glucuronate:xylan alpha-glucuronosyltransferase 1-like isoform X1
CLG synthesis	Other	PGSC0003DMG400024800	PGSC0003DMP400042973	97	64.194	LOC107775958	XP_016451253.1	non-DEG	-3.726	37.172	62.636	1.613	21.652	Glycogenin	UDP-glucuronate:xylan alpha-glucuronosyltransferase 1-like isoform X1
CLG synthesis	Other	PGSC0003DMG400024989	PGSC0003DMP400043370	100	94.156	LOC107793555	XP_016471419.1	-5.199	-6.422	0.963	14.28	0.168	15.609	Nucleic acid binding protein	protein IRX15-LIKE-like
CLG synthesis	Other	PGSC0003DMG400024989	PGSC0003DMP400043370	100	93.831	LOC107803998	XP_016483290.1	-5.199	-7.276	0.963	14.28	0.114	19.07	Nucleic acid binding protein	protein IRX15-LIKE-like
CLG synthesis	Other	PGSC0003DMG400025875	PGSC0003DMP400044884	96	87.086	LOC107765144	XP_016439237.1	-6.153	-2.746	0.261	22.566	2.21	14.884	Conserved gene of unknown function	protein IRX15-LIKE-like
CLG synthesis	Other	PGSC0003DMG400025875	PGSC0003DMP400044884	97	88.079	LOC107804621	XP_016484028.1	-6.153	-3.446	0.261	22.566	0.792	8.775	Conserved gene of unknown function	protein IRX15-LIKE-like
CLG synthesis	Other	PGSC0003DMG400025474	PGSC0003DMP400044177	100	91.447	LOC107759843	XP_016433342.1	-7.113	-8.387	0.891	41.966	0.172	59.924	Nucleic acid binding protein	protein IRX15-LIKE-like
CLG synthesis	Other	PGSC0003DMG400008016	PGSC0003DMP400014093	99	82.723	LOC107800600	XP_016479279.1	-9.593	-5.161	0.03	4.106	0.149	5.522	Glycogenin	UDP-glucuronate:xylan alpha-glucuronosyltransferase 2-like
CLG synthesis	Other	PGSC0003DMG400008016	PGSC0003DMP400014093	100	92.81	LOC107826470	XP_016508943.1	-9.593	-7.208	0.03	4.106	0.042	8.885	Glycogenin	UDP-glucuronate:xylan alpha-glucuronosyltransferase 2-like
CLG synthesis	Other	PGSC0003DMG400008016	PGSC0003DMP400014093	99	86.667	LOC107778390	XP_016454132.1	-9.593	-7.279	0.03	4.106	0.037	5.95	Glycogenin	UDP-glucuronate:xylan alpha-glucuronosyltransferase 2-like isoform X1
CLG synthesis	Xylan acetylation (TBL22-like)	PGSC0003DMG401026555	PGSC0003DMP400046148	99	78.158	LOC107772706	XP_016447673.1	3.581	non-EXP	33.702	2.79	non-EXP	non-EXP	Conserved gene of unknown function	protein trichome birefringence-like 19
CLG synthesis	Xylan acetylation (TBL22-like)	PGSC0003DMG400027890	PGSC0003DMP400048499	99	86.895	LOC107761573	XP_016435293.1	1.208	non-EXP	17.553	9.177	non-EXP	non-EXP	Conserved gene of unknown function	protein trichome birefringence-like 14
CLG synthesis	Xylan acetylation (TBL29/ESK1-like)	PGSC0003DMG400024237	PGSC0003DMP400041932	99	91.336	LOC107793795	XP_016471721.1	-6.488	-8.291	0.189	10.115	0.089	29.267	Conserved gene of unknown function	protein ESKIMO 1-like
CLG synthesis	Xylan acetylation (TBL29/ESK1-like)	PGSC0003DMG400027728	PGSC0003DMP400048220	96	85.153	LOC107776375	XP_016451753.1	-12.973	-5.983	0.08	51.821	0.199	12.689	Conserved gene of unknown function	protein ESKIMO 1-like
CLG synthesis	Xylan acetylation (TBL29/ESK1-like)	PGSC0003DMG400027728	PGSC0003DMP400048220	96	76.282	LOC107801889	XP_016480781.1	-12.973	-7.626	0.08	51.821	0.126	25.248	Conserved gene of unknown function	protein ESKIMO 1-like
CLG synthesis	Xylan acetylation (TBL29/ESK1-like)	PGSC0003DMG400027728	PGSC0003DMP400048220	96	78.723	LOC107793795	XP_016471721.1	-12.973	-8.291	0.08	51.821	0.089	29.267	Conserved gene of unknown function	protein ESKIMO 1-like
CLG synthesis	Xylan acetylation (TBL33-like)	PGSC0003DMG400023940	PGSC0003DMP400041384	100	79.343	LOC107831107	XP_016514323.1	-7.506	-5.001	0.526	59.305	0.099	3.433	Conserved gene of unknown function	protein trichome birefringence-like 33
CLG synthesis	Xylan acetylation (TBL33-like)	PGSC0003DMG400023940	PGSC0003DMP400041384	100	79.577	LOC107759798	XP_016433294.1	-7.506	-6.386	0.526	59.305	0.099	9.004	Conserved gene of unknown function	protein trichome birefringence-like 33
CLG synthesis	Xylan acetylation (TBL33-like)	PGSC0003DMG400023940	PGSC0003DMP400041384	100	91.489	LOC107812894	XP_016493559.1	-7.506	-6.985	0.526	59.305	0.249	31.561	Conserved gene of unknown function	protein trichome birefringence-like 33
CLG synthesis	Xylan acetylation (TBL33-like)	PGSC0003DMG400023940	PGSC0003DMP400041384	100	90.521	LOC107794166	XP_016472116.1	-7.506	-7.558	0.526	59.305	0.141	27.414	Conserved gene of unknown function	protein trichome birefringence-like 33
CLG synthesis	Xylan acetylation (TBL34-like)	PGSC0003DMG401001531	PGSC0003DMP400002762	99	89.756	LOC107822198	XP_016504204.1	5.524	non-DEG	168.836	3.079	3.887	2.554	Conserved gene of unknown function	protein trichome birefringence-like 34
CLG synthesis	Xylan acetylation (TBL34-like)	PGSC0003DMG401001531	PGSC0003DMP400002762	100	89.024	LOC107760970	XP_016434607.1	5.524	1.228	168.836	3.079	2.495	1.075	Conserved gene of unknown function	protein trichome birefringence-like 34
CLG synthesis	Xylan acetylation (TBL34-like)	PGSC0003DMG401001531	PGSC0003DMP400002762	79	62.117	LOC107810956	XP_016491276.1	5.524	-5.133	168.836	3.079	0.58	20.692	Conserved gene of unknown function	protein trichome birefringence-like 34
CLG synthesis	Xylan acetylation (TBL34-like)	PGSC0003DMG400006497	PGSC0003DMP400011515	99	94.093	LOC107810956	XP_016491276.1	-5.606	-5.133	0.101	6.604	0.58	20.692	Conserved gene of unknown function	protein trichome birefringence-like 34
CLG synthesis	Xylan acetylation (TBL34-like)	PGSC0003DMG400006497	PGSC0003DMP400011515	100	93.506	LOC107796696	XP_016474977.1	-5.606	-5.891	0.101	6.604	0.156	9.209	Conserved gene of unknown function	protein trichome birefringence-like 34
CLG synthesis	Xylan acetylation (TBL3-like)	PGSC0003DMG401004451	PGSC0003DMP400007904	100	77.477	LOC107760122	XP_016433625.1	-10.005	-4.6	0.084	7.673	0.187	4.593	Conserved gene of unknown function	protein trichome birefringence-like 3
CLG synthesis	Xylan acetylation (TBL3-like)	PGSC0003DMG401004451	PGSC0003DMP400007904	91	72.897	LOC107827302	XP_016509886.1	-10.005	-5.923	0.084	7.673	0.032	2.227	Conserved gene of unknown function	protein trichome birefringence-like 3
CLG synthesis	Xylan acetylation (TBL3-like)	PGSC0003DMG401004451	PGSC0003DMP400007904	99	88.551	LOC107796037	XP_016474242.1	-10.005	-8.156	0.084	7.673	0.035	11.746	Conserved gene of unknown function	protein trichome birefringence-like 3
CLG synthesis	Xylan acetylation (TBL3-like)	PGSC0003DMG401004451	PGSC0003DMP400007904	75	62.222	LOC107760123	XP_016433626.1	-10.005	-8.842	0.084	7.673	0	4.921	Conserved gene of unknown function	protein trichome birefringence-like 3
CLG synthesis	Xylan acetylation (TBL3-like)	PGSC0003DMG401004451	PGSC0003DMP400007904	100	88.318	LOC107789719	XP_016467064.1	-10.005	-12.532	0.084	7.673	0	18.682	Conserved gene of unknown function	protein trichome birefringence-like 3
CLG synthesis	Xylan backbone	PGSC0003DMG400025579	PGSC0003DMP400044343	100	83.493	LOC107801367	XP_016480163.1	non-EXP	2.205	non-EXP	non-EXP	5.942	1.293	Conserved gene of unknown function	probable beta-1,4-xylosyltransferase IRX10L
CLG synthesis	Xylan backbone	PGSC0003DMG400025579	PGSC0003DMP400044343	100	95.192	LOC107793917	XP_016471852.1	non-EXP	-2.169	non-EXP	non-EXP	3.371	15.234	Conserved gene of unknown function	probable beta-1,4-xylosyltransferase IRX10L
CLG synthesis	Xylan backbone	PGSC0003DMG400025579	PGSC0003DMP400044343	100	95.433	LOC107760089	XP_016433595.1	non-EXP	-3.086	non-EXP	non-EXP	4.237	36.167	Conserved gene of unknown function	probable beta-1,4-xylosyltransferase IRX10L
CLG synthesis	Xylan backbone	PGSC0003DMG400025579	PGSC0003DMP400044343	92	90.933	LOC107809178	XP_016489257.1	non-EXP	-7.045	non-EXP	non-EXP	0.097	12.91	Conserved gene of unknown function	probable beta-1,4-xylosyltransferase IRX10
CLG synthesis	Xylan backbone	PGSC0003DMG400013327	PGSC0003DMP400023573	100	86.614	LOC107796855	XP_016475171.1	-2.125	-1.973	26.895	140.19	4.749	18.772	Glycosyltransferase	probable beta-1,4-xylosyltransferase IRX14
CLG synthesis	Xylan backbone	PGSC0003DMG400013327	PGSC0003DMP400023573	100	86.614	LOC107769571	XP_016444283.1	-2.125	-2.127	26.895	140.19	3.016	13.268	Glycosyltransferase	probable beta-1,4-xylosyltransferase IRX14
CLG synthesis	Xylan sidechain (MUCI21-like)	PGSC0003DMG400028330	PGSC0003DMP400049265	99	76.221	LOC107802989	XP_016482066.1	8.102	non-EXP	105.305	0.128	non-EXP	non-EXP	Transferase, transferring glycosyl groups	uncharacterized protein LOC107802989
CLG synthesis	Xylan sidechain (MUCI21-like)	PGSC0003DMG400023731	PGSC0003DMP400041067	99	85.178	LOC107776472	XP_016451860.1	6.242	4.244	148.793	1.488	24.306	1.324	Glycosyltransferase	uncharacterized protein LOC107776472
CLG synthesis	Xylan sidechain (MUCI21-like)	PGSC0003DMG400027288	PGSC0003DMP400047471	99	84.557	LOC107827696	XP_016510367.1	5.053	non-DEG	92.448	2.205	2.821	1.69	Glycosyltransferase	EGF domain-specific O-linked N-acetylglucosamine transferase-like
CLG synthesis	Xyloglucan xylosyl side chain (XXT-like)	PGSC0003DMG400022852	PGSC0003DMP400039617	99	91.595	LOC107784501	XP_016461132.1	non-DEG	-1.512	22.919	30.166	16.769	48.308	Xylosyl transferase	xyloglucan 6-xylosyltransferase 2-like
CLG synthesis	Xyloglucan xylosyl side chain (XXT-like)	PGSC0003DMG400022852	PGSC0003DMP400039617	99	91.183	LOC107831198	XP_016514426.1	non-DEG	-1.643	22.919	30.166	14.949	47.036	Xylosyl transferase	xyloglucan 6-xylosyltransferase 2-like
CLG synthesis	Xyloglucan xylosyl side chain (XXT-like)	PGSC0003DMG400016008	PGSC0003DMP400028012	99	91.009	LOC107799955	XP_016478584.1	-1.395	non-DEG	1.437	4.297	0.827	1.561	Glycosyltransferase	probable xyloglucan 6-xylosyltransferase 3
CLG synthesis		PGSC0003DMG400035299	PGSC0003DMP400057403	100	89.391	LOC107764363	XP_016438403.1	1.49	3.656	2.346	1.077	9.703	0.791	Alpha-6-galactosyltransferase	glycosyltransferase 6-like
CLG synthesis		PGSC0003DMG400035299	PGSC0003DMP400057403	100	89.842	LOC107774207	XP_016449177.1	1.49	3.522	2.346	1.077	8.935	0.811	Alpha-6-galactosyltransferase	glycosyltransferase 6-like
Polygalacturonic acid degradation	Acetylesterases	PGSC0003DMG400005363	PGSC0003DMP400009495	80	89.625	LOC107783981	XP_016460503.1	non-EXP	7.046	non-EXP	non-EXP	4.304	0.044	PAE	pectin acetylesterase 8-like isoform X1
Polygalacturonic acid degradation	Acetylesterases	PGSC0003DMG400004527	PGSC0003DMP400008000	43	55.294	LOC107795498	XP_016473642.1	non-EXP	5.912	non-EXP	non-EXP	11.369	0.25	PAE	uncharacterized protein LOC107795498 isoform X1
Polygalacturonic acid degradation	Acetylesterases	PGSC0003DMG400031385	PGSC0003DMP400054672	100	83.607	LOC107826495	XP_016508968.1	non-EXP	-1.909	non-EXP	non-EXP	2.538	9.548	Pectin acetylesterase	pectin acetylesterase 12-like isoform X1
Polygalacturonic acid degradation	Acetylesterases	PGSC0003DMG400031385	PGSC0003DMP400054672	100	83.841	LOC107775393	XP_016450603.1	non-EXP	-2.296	non-EXP	non-EXP	2.462	12.153	Pectin acetylesterase	pectin acetylesterase 12-like
Polygalacturonic acid degradation	Acetylesterases	PGSC0003DMG400015711	PGSC0003DMP400027551	100	90.05	LOC107792267	XP_016469948.1	non-DEG	2.516	7.011	19.707	24.292	4.245	PAE	pectin acetylesterase 8-like
Polygalacturonic acid degradation	Acetylesterases	PGSC0003DMG400015711	PGSC0003DMP400027551	100	88.861	LOC107760776	XP_016434369.1	non-DEG	1.482	7.011	19.707	15.888	5.695	PAE	pectin acetylesterase 8-like
Polygalacturonic acid degradation	Acetylesterases	PGSC0003DMG402024140	PGSC0003DMP400041746	99	88.412	LOC107806382	XP_016486013.1	4.978	-2.456	639.687	31.722	19.297	106.258	PAE	pectin acetylesterase 8-like
Polygalacturonic acid degradation	Acetylesterases	PGSC0003DMG401024140	PGSC0003DMP400041742	96	92.506	LOC107806382	XP_016486013.1	1.059	-2.456	394.604	275.438	19.297	106.258	PAE	pectin acetylesterase 8-like
Polygalacturonic acid degradation	Acetylesterases	PGSC0003DMG401024140	PGSC0003DMP400041742	99	92.506	LOC107767541	XP_016442057.1	1.059	-2.975	394.604	275.438	18.126	143.057	PAE	pectin acetylesterase 8-like
Polygalacturonic acid degradation	Acetylesterases	PGSC0003DMG400031385	PGSC0003DMP400054670	78	79.054	LOC107826495	XP_016508968.1	-2.772	-1.909	0.529	2.839	2.538	9.548	Pectin acetylesterase	pectin acetylesterase 12-like isoform X1
Polygalacturonic acid degradation	Acetylesterases	PGSC0003DMG400018236	PGSC0003DMP400031771	99	88.01	LOC107802101	XP_016481028.1	-4.011	-1.626	1.184	25.694	2.657	8.247	Pectinacetylesterase	pectin acetylesterase 12-like isoform X1
Polygalacturonic acid degradation	Glucuronidases	PGSC0003DMG400011026	PGSC0003DMP400019475	99	77.819	LOC107813759	XP_016494546.1	1.734	non-DEG	21.683	4.122	2.964	1.78	Heparanase	heparanase-like protein 3
Polygalacturonic acid degradation	Glucuronidases	PGSC0003DMG400030715	PGSC0003DMP400053498	100	87.175	LOC107813165	XP_016493875.1	-7.426	-3.148	0.34	15.181	1.138	10.155	Heparanase	heparanase-like protein 3
Polygalacturonic acid degradation	Glucuronidases	PGSC0003DMG400030715	PGSC0003DMP400053498	99	86.245	LOC107828335	XP_016511107.1	-7.426	-3.385	0.34	15.181	2.034	21.342	Heparanase	heparanase-like protein 3
Polygalacturonic acid degradation	Methylesterase inhibitor	PGSC0003DMG400010815	PGSC0003DMP400019111	99	83.256	LOC107826079	XP_016508511.1	7.323	-2.443	13.082	0.144	1.593	8.86	PME inhibitor	21 kDa protein-like
Polygalacturonic acid degradation	Methylesterase inhibitor	PGSC0003DMG400012020	PGSC0003DMP400021265	99	83.415	LOC107815292	XP_016496335.1	4.248	4.07	367.157	20.769	37.239	2.175	Pectin methlyesterase inhibitor protein 1	21 kDa protein-like
Polygalacturonic acid degradation	Methylesterase inhibitor	PGSC0003DMG400028048	PGSC0003DMP400048734	99	78.155	LOC107829059	XP_016511972.1	2.634	non-DEG	11.43	1.959	6.933	9.877	Pectin methylesterase inhibitor isoform	21 kDa protein-like
Polygalacturonic acid degradation	Methylesterase inhibitor	PGSC0003DMG400031816	PGSC0003DMP400055069	99	87.631	LOC107761007	XP_016434647.1	-1.904	non-EXP	0.337	2.464	non-EXP	non-EXP	Pectinesterase	probable pectinesterase/pectinesterase inhibitor 41
Polygalacturonic acid degradation	Methylesterase inhibitor	PGSC0003DMG400031344	PGSC0003DMP400054598	91	77.909	LOC107775947	XP_016451245.1	-2.082	-1.83	3.032	16.086	3.387	12.155	Pectinesterase-2	probable pectinesterase/pectinesterase inhibitor 51
Polygalacturonic acid degradation	Methylesterase inhibitor	PGSC0003DMG400010814	PGSC0003DMP400019108	99	76.074	LOC107831707	XP_016514981.1	-2.095	non-EXP	0.281	1.873	non-EXP	non-EXP	Conserved gene of unknown function	21 kDa protein-like
Polygalacturonic acid degradation	Methylesterase inhibitor	PGSC0003DMG400009081	PGSC0003DMP400015990	100	89.002	LOC107826812	XP_016509331.1	-2.153	-2.563	10.195	81.868	8.888	52.907	Pectin methylesterase 1	probable pectinesterase/pectinesterase inhibitor 61
Polygalacturonic acid degradation	Methylesterase inhibitor	PGSC0003DMG400009081	PGSC0003DMP400015990	99	88.462	LOC107808989	XP_016489051.1	-2.153	-4.048	10.195	81.868	1.765	29.315	Pectin methylesterase 1	probable pectinesterase/pectinesterase inhibitor 61
Polygalacturonic acid degradation	Methylesterase inhibitor	PGSC0003DMG400028674	PGSC0003DMP400049953	91	83.301	LOC107764709	XP_016438798.1	-2.761	non-EXP	0.917	7.676	non-EXP	non-EXP	Pectinesterase-2	probable pectinesterase/pectinesterase inhibitor 51
Polygalacturonic acid degradation	Methylesterase inhibitor	PGSC0003DMG400021575	PGSC0003DMP400037407	99	89.009	LOC107788209	XP_016465371.1	-3.115	non-EXP	0.173	2.49	non-EXP	non-EXP	Pectinesterase	probable pectinesterase/pectinesterase inhibitor 33
Polygalacturonic acid degradation	Methylesterase inhibitor	PGSC0003DMG400004735	PGSC0003DMP400008395	99	87.912	LOC107808283	XP_016488278.1	-3.117	non-DEG	2.884	55.418	11.295	9.366	Conserved gene of unknown function	21 kDa protein-like
Polygalacturonic acid degradation	Methylesterase inhibitor	PGSC0003DMG400028675	PGSC0003DMP400049954	96	85.635	LOC107792197	XP_016469874.1	-4.294	-1.315	1.388	38.503	3.561	8.955	Pectinesterase-2	probable pectinesterase/pectinesterase inhibitor 51
Polygalacturonic acid degradation	Methylesterase inhibitor	PGSC0003DMG400028675	PGSC0003DMP400049954	96	86.424	LOC107775947	XP_016451245.1	-4.294	-1.83	1.388	38.503	3.387	12.155	Pectinesterase-2	probable pectinesterase/pectinesterase inhibitor 51
Polygalacturonic acid degradation	Methylesterase inhibitor	PGSC0003DMG400019611	PGSC0003DMP400034073	99	79.174	LOC107803807	XP_016483078.1	-7.287	-3.626	0.861	199.52	1.698	21.083	Pectin methylesterase 1	probable pectinesterase/pectinesterase inhibitor 34
Polygalacturonic acid degradation	Methylesterase inhibitor	PGSC0003DMG400019611	PGSC0003DMP400034073	100	80.331	LOC107815257	XP_016496306.1	-7.287	-3.831	0.861	199.52	2.084	29.874	Pectin methylesterase 1	probable pectinesterase/pectinesterase inhibitor 34
Polygalacturonic acid degradation	Methylesterase inhibitor	PGSC0003DMG400019123	PGSC0003DMP400033225	89	79.397	LOC107768231	XP_016442823.1	-9.857	-3.904	0.164	188.837	0.865	13.265	Pectinesterase inhibitor	21 kDa protein-like
Polygalacturonic acid degradation	Methylesterases	PGSC0003DMG400003314	PGSC0003DMP400005947	83	67.331	LOC107768588	XP_016443197.1	non-EXP	3.562	non-EXP	non-EXP	2.215	0.162	Carbohydrate esterase	probable carbohydrate esterase At4g34215 isoform X1
Polygalacturonic acid degradation	Methylesterases	PGSC0003DMG400000293	PGSC0003DMP400000586	73	47.869	LOC107778098	XP_016453776.1	non-EXP	-6.772	non-EXP	non-EXP	0.04	4.411	Pectinesterase	probable pectinesterase 15
Polygalacturonic acid degradation	Methylesterases	PGSC0003DMG400003687	PGSC0003DMP400006574	99	72.093	LOC107769487	XP_016444192.1	non-DEG	9.904	0.778	0.042	3.998	0	Pectinesterase-3	putative pectinesterase 11
Polygalacturonic acid degradation	Methylesterases	PGSC0003DMG400003687	PGSC0003DMP400006574	99	72.674	LOC107831942	XP_016515223.1	non-DEG	9.8	0.778	0.042	3.698	0	Pectinesterase-3	putative pectinesterase 11
Polygalacturonic acid degradation	Methylesterases	PGSC0003DMG400006404	PGSC0003DMP400011358	100	89.216	LOC107810471	XP_016490746.1	non-DEG	-3.829	1.963	2.581	0.203	2.967	Carbohydrate esterase	probable carbohydrate esterase At4g34215
Polygalacturonic acid degradation	Methylesterases	PGSC0003DMG400009177	PGSC0003DMP400016181	100	81.897	LOC107771445	XP_016446290.1	1.658	-1.855	12.441	4.363	0.927	3.367	Pectinesterase 3	pectinesterase 1-like
Polygalacturonic acid degradation	Methylesterases	PGSC0003DMG400009177	PGSC0003DMP400016181	99	83.391	LOC107788952	XP_016466184.1	1.658	-2.493	12.441	4.363	1.29	7.309	Pectinesterase 3	pectinesterase 3-like
Polygalacturonic acid degradation	Methylesterases	PGSC0003DMG400018145	PGSC0003DMP400031616	99	81.893	LOC107763002	XP_016436893.1	-1.178	non-DEG	15.581	54.553	5.82	5.672	Enzyme inhibitor	pectinesterase 1-like
Polygalacturonic acid degradation	Methylesterases	PGSC0003DMG400018238	PGSC0003DMP400031772	99	87.5	LOC107820884	XP_016502724.1	-2.362	-1.739	10.337	74.226	15.153	50.625	Hydrolase	probable carbohydrate esterase At4g34215
Polygalacturonic acid degradation	Methylesterases	PGSC0003DMG400002085	PGSC0003DMP400003743	99	85.185	LOC107785386	XP_016462163.1	-3.367	-2.658	13.192	72.567	5.571	35.412	Pectinesterase	pectinesterase-like isoform X1
Polygalacturonic acid degradation	Methylesterases	PGSC0003DMG400025967	PGSC0003DMP400045032	99	84.291	LOC107793308	XP_016471127.1	-4.851	non-DEG	9.748	559.667	6.896	1.206	Pectinesterase	pectinesterase 2-like
Polygalacturonic acid degradation	Methylesterases	PGSC0003DMG400025967	PGSC0003DMP400045032	99	82.95	LOC107770142	XP_016444900.1	-4.851	2.387	9.748	559.667	50.872	9.862	Pectinesterase	pectinesterase 2-like
Polygalacturonic acid degradation	Methylesterases	PGSC0003DMG400031791	PGSC0003DMP400055021	100	84.71	LOC107818898	XP_016500460.1	-5.251	-2.149	0.052	4.618	0.706	3.191	Pectinesterase	pectinesterase-like
Polygalacturonic acid degradation	Methylesterases	PGSC0003DMG400031791	PGSC0003DMP400055021	100	85.237	LOC107807089	XP_016486864.1	-5.251	-2.184	0.052	4.618	2.048	9.359	Pectinesterase	pectinesterase-like
Polygalacturonic acid degradation	Methylesterases	PGSC0003DMG402017934	PGSC0003DMP400031280	99	85.211	LOC107782372	XP_016458739.1	-6.108	-3.783	0.065	2.992	6.598	90.989	Pectinesterase	pectinesterase-like
Polygalacturonic acid degradation	Methylesterases	PGSC0003DMG400011746	PGSC0003DMP400020825	99	93.596	LOC107774467	XP_016449486.1	-6.87	non-EXP	0	16.584	non-EXP	non-EXP	Pectinesterase	probable pectinesterase 8 isoform X1
Polygalacturonic acid degradation	Methylesterases	PGSC0003DMG400011746	PGSC0003DMP400020825	45	96.711	LOC107771684	XP_016446600.1	-6.87	-7.452	0	16.584	0.021	4.767	Pectinesterase	probable pectinesterase 8
Polygalacturonic acid degradation	Methylesterases	PGSC0003DMG400001844	PGSC0003DMP400003302	90	83.24	LOC107763139	XP_016437069.1	-8.415	non-EXP	0	6.249	non-EXP	non-EXP	Invertase inhibitor	putative invertase inhibitor
Polygalacturonic acid degradation	Methylesterases	PGSC0003DMG400005206	PGSC0003DMP400009251	94	87.363	LOC107794007	XP_016471940.1	-9.239	-6.534	0.027	23.234	0.123	11.723	Pectinesterase	probable pectinesterase 53
Polygalacturonic acid degradation	Methylesterases	PGSC0003DMG400005206	PGSC0003DMP400009251	81	82.979	LOC107767841	XP_016442425.1	-9.239	-11.566	0.027	23.234	0	15.724	Pectinesterase	probable pectinesterase 68
Polygalacturonic acid degradation	Methylesterases inhibitors	PGSC0003DMG400018146	PGSC0003DMP400031617	94	29.104	LOC107825701	XP_016508077.1	non-EXP	4.124	non-EXP	non-EXP	7.192	0.416	Pectinesterase	putative pectinesterase/pectinesterase inhibitor 26
Polygalacturonic acid degradation	Methylesterases inhibitors	PGSC0003DMG400004627	PGSC0003DMP400008185	100	83.542	LOC107775110	XP_016450277.1	non-EXP	3.694	non-EXP	non-EXP	2.467	0.184	Pectinesterase	pectinesterase-like
Polygalacturonic acid degradation	Methylesterases inhibitors	PGSC0003DMG400046440	PGSC0003DMP400068544	100	58.523	LOC107812004	XP_016492497.1	non-EXP	-3.17	non-EXP	non-EXP	0.353	3.133	Pectinesterase inhibitor	pectinesterase inhibitor-like
Polygalacturonic acid degradation	Methylesterases inhibitors	PGSC0003DMG400018993	PGSC0003DMP400033049	99	86.491	LOC107818643	XP_016500168.1	non-EXP	-5.507	non-EXP	non-EXP	0.097	4.623	Pectinesterase	probable pectinesterase/pectinesterase inhibitor 25
Polygalacturonic acid degradation	Methylesterases inhibitors	PGSC0003DMG400018993	PGSC0003DMP400033049	100	85.366	LOC107787878	XP_016464978.1	non-EXP	-6.111	non-EXP	non-EXP	0.142	9.971	Pectinesterase	probable pectinesterase/pectinesterase inhibitor 25
Polygalacturonic acid degradation	Methylesterases inhibitors	PGSC0003DMG403024767	PGSC0003DMP400042918	100	91.344	LOC107780113	XP_016456121.1	non-DEG	-3.067	1.081	2.477	0.343	2.89	Pectinesterase	putative pectinesterase/pectinesterase inhibitor 22
Polygalacturonic acid degradation	Methylesterases inhibitors	PGSC0003DMG403024767	PGSC0003DMP400042918	100	90.976	LOC107760401	XP_016433934.1	non-DEG	-3.758	1.081	2.477	0.139	1.882	Pectinesterase	putative pectinesterase/pectinesterase inhibitor 22
Polygalacturonic acid degradation	Polygalacturonan lyases	PGSC0003DMG400016440	PGSC0003DMP400028760	93	59.714	LOC107767876	XP_016442466.1	non-EXP	4.3	non-EXP	non-EXP	1.966	0.087	Pectate lyase	putative pectate lyase 2
Polygalacturonic acid degradation	Polygalacturonan lyases	PGSC0003DMG400020156	PGSC0003DMP400034981	98	89.631	LOC107786866	XP_016463851.1	non-EXP	-4.837	non-EXP	non-EXP	0.615	17.675	Pectase lyase	probable pectate lyase 8
Polygalacturonic acid degradation	Polygalacturonan lyases	PGSC0003DMG400023931	PGSC0003DMP400041370	100	85.95	LOC107759580	XP_016433039.1	non-DEG	-1.416	2.612	6.717	5.807	15.682	Pollen allergen Amb a 1.1	probable pectate lyase 4
Polygalacturonic acid degradation	Polygalacturonan lyases	PGSC0003DMG400023931	PGSC0003DMP400041370	100	85.675	LOC107787860	XP_016464960.1	non-DEG	-1.699	2.612	6.717	7.554	24.686	Pollen allergen Amb a 1.1	probable pectate lyase 4
Polygalacturonic acid degradation	Polygalacturonan lyases	PGSC0003DMG400031065	PGSC0003DMP400054109	95	78.386	LOC107769299	XP_016443993.1	non-DEG	-2.308	6.519	15.977	0.946	4.741	Pectate lyase	probable pectate lyase 12 isoform X1
Polygalacturonic acid degradation	Polygalacturonan lyases	PGSC0003DMG400031065	PGSC0003DMP400054109	99	83.434	LOC107778084	XP_016453759.1	non-DEG	-3.023	6.519	15.977	0.495	4.039	Pectate lyase	probable pectate lyase 13 isoform X1
Polygalacturonic acid degradation	Polygalacturonan lyases	PGSC0003DMG400031065	PGSC0003DMP400054109	100	72.655	LOC107825055	XP_016507376.1	non-DEG	-3.043	6.519	15.977	0.953	7.902	Pectate lyase	probable pectate lyase 5 isoform X1
Polygalacturonic acid degradation	Polygalacturonan lyases	PGSC0003DMG400004325	PGSC0003DMP400007689	92	85.091	LOC107825055	XP_016507376.1	-2.833	-3.043	0.617	5.735	0.953	7.902	Gene of unknown function	probable pectate lyase 5 isoform X1
Polygalacturonic acid degradation	Polygalacturonan lyases	PGSC0003DMG400010771	PGSC0003DMP400019050	100	92.786	LOC107805029	XP_016484486.1	-5.572	-3.951	0.103	6.321	1.59	24.641	Pectate lyase	probable pectate lyase 5
Polygalacturonic acid degradation	Polygalacturonan lyases	PGSC0003DMG400010771	PGSC0003DMP400019050	100	93.069	LOC107763389	XP_016437369.1	-5.572	-4.209	0.103	6.321	2.282	42.263	Pectate lyase	probable pectate lyase 5
Polygalacturonic acid degradation	Polygalacturonan lyases	PGSC0003DMG400012640	PGSC0003DMP400022394	99	91.358	LOC107798776	XP_016477301.1	-6.066	non-DEG	0.358	17.765	38.789	15.201	Pectate lyase P18	probable pectate lyase P18
Polygalacturonic acid degradation	Polygalacturonan lyases	PGSC0003DMG400012640	PGSC0003DMP400022394	95	93.523	LOC107814732	XP_016495669.1	-6.066	1.784	0.358	17.765	23.3	6.731	Pectate lyase P18	probable pectate lyase P18
Polygalacturonic acid degradation	Polygalacturonan lyases	PGSC0003DMG400015815	PGSC0003DMP400027737	99	90.703	LOC107823132	XP_016505210.1	-7.175	-2.008	0.066	11.606	1.627	6.604	Pectase lyase	probable pectate lyase 8
Polygalacturonic acid degradation	Polygalacturonan lyases	PGSC0003DMG400015230	PGSC0003DMP400026712	93	94.974	LOC107764788	XP_016438872.1	-8.851	-1.835	0.195	80.682	8.982	31.991	Pectate lyase	probable pectate lyase 18
Polygalacturonic acid degradation	Polygalacturonan lyases	PGSC0003DMG400015230	PGSC0003DMP400026712	93	94.444	LOC107828480	XP_016511288.1	-8.851	-1.843	0.195	80.682	15.685	56.43	Pectate lyase	probable pectate lyase 18
Polygalacturonic acid degradation	Polygalacturonan lyases	PGSC0003DMG400003871	PGSC0003DMP400006877	86	91.08	LOC107798922	XP_016477434.1	-9.206	-3.673	0	4.023	0.53	6.87	Pectate lyase	probable pectate lyase 12
Polygalacturonic acid degradation	Polygalacturonan lyases	PGSC0003DMG400003871	PGSC0003DMP400006877	86	91.549	LOC107785780	XP_016462638.1	-9.206	-3.78	0	4.023	0.318	4.489	Pectate lyase	probable pectate lyase 12
Polygalacturonic acid degradation	Polygalacturonan lyases	PGSC0003DMG400020156	PGSC0003DMP400034980	99	85	LOC107811053	XP_016491388.1	-9.343	non-DEG	0.134	4.046	0.65	10.715	Pectase lyase	probable pectate lyase 8
Polygalacturonic acid degradation	Polygalacturonan lyases	PGSC0003DMG400029645	PGSC0003DMP400051648	95	93.925	LOC107828150	XP_016510897.1	-10.142	-3.714	0.565	597.26	4.677	61.116	Pectase lyase	probable pectate lyase 8
Polygalacturonic acid degradation	Polygalacturonan lyases	PGSC0003DMG400029645	PGSC0003DMP400051648	96	93.692	LOC107783470	XP_016459929.1	-10.142	-4.219	0.565	597.26	3.544	65.771	Pectase lyase	probable pectate lyase 8
Polygalacturonic acid degradation	Polygalacturonan lyases	PGSC0003DMG400027070	PGSC0003DMP400047017	94	88.189	LOC107764788	XP_016438872.1	-10.231	-1.835	0	8.756	8.982	31.991	Pectate lyase	probable pectate lyase 18
Polygalacturonic acid degradation	Polygalacturonan lyases	PGSC0003DMG400027070	PGSC0003DMP400047017	94	90	LOC107764355	XP_016438395.1	-10.231	-3.124	0	8.756	1.034	9.019	Pectate lyase	probable pectate lyase 18
Polygalacturonic acid degradation	Polygalacturonase inhibitor-like	PGSC0003DMG401022197	PGSC0003DMP400038422	99	85.583	LOC107824195	XP_016506424.1	3.308	non-DEG	66.516	8.972	41.05	22.919	Polygalacturonase inhibitor protein	polygalacturonase inhibitor-like
Polygalacturonic acid degradation	Polygalacturonase inhibitor-like	PGSC0003DMG401022197	PGSC0003DMP400038422	98	84.049	LOC107799852	XP_016478478.1	3.308	2.417	66.516	8.972	89.645	17.022	Polygalacturonase inhibitor protein	polygalacturonase inhibitor-like
Polygalacturonic acid degradation	Polygalacturonase inhibitor-like	PGSC0003DMG401022197	PGSC0003DMP400038422	97	81.424	LOC107817845	XP_016499220.1	3.308	-2.624	66.516	8.972	0.749	4.634	Polygalacturonase inhibitor protein	polygalacturonase inhibitor-like
Polygalacturonic acid degradation	Polygalacturonase inhibitor-like	PGSC0003DMG400009178	PGSC0003DMP400016183	99	88.625	LOC107788953	XP_016466186.1	-1.178	non-DEG	17.792	48.475	263.077	124.626	Pectinesterase	pectinesterase/pectinesterase inhibitor U1
Polygalacturonic acid degradation	Polygalacturonase inhibitor-like	PGSC0003DMG400015933	PGSC0003DMP400027914	99	85.955	LOC107823626	XP_016505800.1	-1.964	non-DEG	1.249	3.717	2.316	4.735	Pectinesterase PPE8B	pectinesterase/pectinesterase inhibitor PPE8B-like
Polygalacturonic acid degradation	Polygalacturonase inhibitor-like	PGSC0003DMG400015933	PGSC0003DMP400027914	99	85.634	LOC107822220	XP_016504227.1	-1.964	-1.596	1.249	3.717	2.347	7.119	Pectinesterase PPE8B	pectinesterase/pectinesterase inhibitor PPE8B-like
Polygalacturonic acid degradation	Polygalacturonases	PGSC0003DMG400029265	PGSC0003DMP400050945	100	81.795	LOC107799308	XP_016477891.1	non-EXP	8.625	non-EXP	non-EXP	7.339	0.012	Polygalacturonase 5	polygalacturonase-like
Polygalacturonic acid degradation	Polygalacturonases	PGSC0003DMG400029265	PGSC0003DMP400050945	99	81.282	LOC107804016	XP_016483309.1	non-EXP	6.86	non-EXP	non-EXP	6.447	0.075	Polygalacturonase 5	polygalacturonase-like
Polygalacturonic acid degradation	Polygalacturonases	PGSC0003DMG400006862	PGSC0003DMP400012161	81	82.808	LOC107804415	XP_016483789.1	non-EXP	6.49	non-EXP	non-EXP	6.636	0.058	Polygalacturonase	polygalacturonase-like
Polygalacturonic acid degradation	Polygalacturonases	PGSC0003DMG400006862	PGSC0003DMP400012161	81	82.235	LOC107825799	XP_016508200.1	non-EXP	3.772	non-EXP	non-EXP	10.708	0.792	Polygalacturonase	polygalacturonase-like isoform X1
Polygalacturonic acid degradation	Polygalacturonases	PGSC0003DMG400029450	PGSC0003DMP400051302	96	83.262	LOC107761253	XP_016434946.1	non-EXP	-1.972	non-EXP	non-EXP	2.324	9.24	Polygalacturonase	polygalacturonase At1g48100-like
Polygalacturonic acid degradation	Polygalacturonases	PGSC0003DMG400013516	PGSC0003DMP400023906	100	86.133	LOC107802165	XP_016481100.1	non-EXP	-2.601	non-EXP	non-EXP	6.591	40.566	Polygalacturonase	polygalacturonase At1g48100-like
Polygalacturonic acid degradation	Polygalacturonases	PGSC0003DMG400020565	PGSC0003DMP400035736	98	69.672	LOC107785425	XP_016462214.1	non-EXP	-2.61	non-EXP	non-EXP	0.88	5.318	EPIDERMAL PATTERNING FACTOR 6	polygalacturonase-like
Polygalacturonic acid degradation	Polygalacturonases	PGSC0003DMG400029450	PGSC0003DMP400051302	96	82.189	LOC107802133	XP_016481067.1	non-EXP	-2.688	non-EXP	non-EXP	1.095	7.116	Polygalacturonase	polygalacturonase At1g48100-like
Polygalacturonic acid degradation	Polygalacturonases	PGSC0003DMG400030995	PGSC0003DMP400053988	97	84.176	LOC107820174	XP_016501887.1	non-EXP	-2.847	non-EXP	non-EXP	8.48	61.176	Polygalacturonase-1 non-catalytic subunit beta	polygalacturonase-1 non-catalytic subunit beta-like
Polygalacturonic acid degradation	Polygalacturonases	PGSC0003DMG400030995	PGSC0003DMP400053988	97	84.666	LOC107769321	XP_016444012.1	non-EXP	-3.463	non-EXP	non-EXP	4.46	49.225	Polygalacturonase-1 non-catalytic subunit beta	polygalacturonase-1 non-catalytic subunit beta-like
Polygalacturonic acid degradation	Polygalacturonases	PGSC0003DMG401009510	PGSC0003DMP400016819	88	89.209	LOC107789698	XP_016467040.1	non-DEG	2.191	0.806	0.38	2.29	0.53	Polygalacturonase	probable polygalacturonase
Polygalacturonic acid degradation	Polygalacturonases	PGSC0003DMG400012934	PGSC0003DMP400022903	100	87.368	LOC107759633	XP_016433099.1	non-DEG	1.53	14.579	24.625	21.766	7.607	Glycoside hydrolase family 28 protein / polygalacturonase (pectinase) family protein	exopolygalacturonase-like isoform X1
Polygalacturonic acid degradation	Polygalacturonases	PGSC0003DMG400012934	PGSC0003DMP400022903	100	86.345	LOC107791996	XP_016469653.1	non-DEG	1.112	14.579	24.625	11.292	5.262	Glycoside hydrolase family 28 protein / polygalacturonase (pectinase) family protein	probable polygalacturonase isoform X2
Polygalacturonic acid degradation	Polygalacturonases	PGSC0003DMG400012156	PGSC0003DMP400021481	97	91.855	LOC107816298	XP_016497484.1	non-DEG	-2.825	3.337	6.398	1.562	11.095	Polygalacturonase	probable polygalacturonase
Polygalacturonic acid degradation	Polygalacturonases	PGSC0003DMG402012324	PGSC0003DMP400021809	100	92.531	LOC107770152	XP_016444909.1	non-DEG	-4.302	123.367	339.726	3.093	61.678	Polygalacturonase	probable polygalacturonase
Polygalacturonic acid degradation	Polygalacturonases	PGSC0003DMG402012324	PGSC0003DMP400021809	100	91.701	LOC107826279	XP_016508730.1	non-DEG	-4.694	123.367	339.726	1.494	39.127	Polygalacturonase	probable polygalacturonase
Polygalacturonic acid degradation	Polygalacturonases	PGSC0003DMG400030994	PGSC0003DMP400053986	98	84.927	LOC107820175	XP_016501888.1	4.752	-2.15	100.285	1.709	2.804	12.509	Polygalacturonase-1 non-catalytic subunit beta	polygalacturonase-1 non-catalytic subunit beta-like
Polygalacturonic acid degradation	Polygalacturonases	PGSC0003DMG400027019	PGSC0003DMP400046917	52	35.135	LOC107815214	XP_016496229.1	4.602	-2.416	14.629	0.658	0.876	4.714	Polygalacturonase-1 non-catalytic subunit beta	polygalacturonase 1 beta-like protein 3
Polygalacturonic acid degradation	Polygalacturonases	PGSC0003DMG400022104	PGSC0003DMP400038206	99	76.768	LOC107770857	XP_016445679.1	3.41	non-EXP	15.335	1.721	non-EXP	non-EXP	Polygalacturonase	probable polygalacturonase At3g15720 isoform X2
Polygalacturonic acid degradation	Polygalacturonases	PGSC0003DMG400014216	PGSC0003DMP400025011	99	90.554	LOC107797173	XP_016475522.1	-1.242	non-DEG	2.822	7.172	1.608	2.31	Polygalacturonase	probable polygalacturonase
Polygalacturonic acid degradation	Polygalacturonases	PGSC0003DMG400002931	PGSC0003DMP400005283	99	90.323	LOC107815660	XP_016496762.1	-1.346	non-DEG	22.154	82.991	13.005	23.602	Polygalacturonase	probable polygalacturonase
Polygalacturonic acid degradation	Polygalacturonases	PGSC0003DMG400002931	PGSC0003DMP400005283	100	81.087	LOC107789313	XP_016466576.1	-1.346	-2.806	22.154	82.991	1.712	12.066	Polygalacturonase	probable polygalacturonase
Polygalacturonic acid degradation	Polygalacturonases	PGSC0003DMG400000608	PGSC0003DMP400001219	99	82.743	LOC107778498	XP_016454253.1	-1.364	-1.276	2.731	9.929	2.458	5.981	Polygalacturonase	probable polygalacturonase At1g80170
Polygalacturonic acid degradation	Polygalacturonases	PGSC0003DMG400000608	PGSC0003DMP400001219	95	81.839	LOC107779855	XP_016455841.1	-1.364	-2.09	2.731	9.929	2.765	11.821	Polygalacturonase	probable polygalacturonase At1g80170
Polygalacturonic acid degradation	Polygalacturonases	PGSC0003DMG400000608	PGSC0003DMP400001219	96	66.514	LOC107779724	XP_016455688.1	-1.364	-6.089	2.731	9.929	0.012	0.945	Polygalacturonase	probable polygalacturonase At1g80170
Polygalacturonic acid degradation	Polygalacturonases	PGSC0003DMG400011767	PGSC0003DMP400020856	99	85.336	LOC107830244	XP_016513232.1	-1.666	non-EXP	1.516	5.015	non-EXP	non-EXP	Polygalacturonase	probable polygalacturonase
Polygalacturonic acid degradation	Polygalacturonases	PGSC0003DMG400011767	PGSC0003DMP400020856	98	85.54	LOC107832369	XP_016515699.1	-1.666	1.605	1.516	5.015	8.94	2.971	Polygalacturonase	probable polygalacturonase
Polygalacturonic acid degradation	Polygalacturonases	PGSC0003DMG400021630	PGSC0003DMP400037509	99	84.106	LOC107828316	XP_016511081.1	-3.014	-6.797	0.643	5.913	0.018	2.138	Polygalacturonase	probable polygalacturonase At1g80170
Polygalacturonic acid degradation	Polygalacturonases	PGSC0003DMG400021630	PGSC0003DMP400037509	99	84.547	LOC107789394	XP_016466674.1	-3.014	-8.575	0.643	5.913	0.085	35.267	Polygalacturonase	probable polygalacturonase At1g80170
Polygalacturonic acid degradation	Polygalacturonases	PGSC0003DMG400007306	PGSC0003DMP400012939	99	90.372	LOC107764241	XP_016438282.1	-3.407	-2.372	0.566	9.572	4.225	21.882	Polygalacturonase	probable polygalacturonase
Polygalacturonic acid degradation	Polygalacturonases	PGSC0003DMG400031797	PGSC0003DMP400055030	99	88.913	LOC107811919	XP_016492396.1	-3.757	-2.531	5.381	88.061	2.679	15.57	Polygalacturonase	probable polygalacturonase
Polygalacturonic acid degradation	Polygalacturonases	PGSC0003DMG400031797	PGSC0003DMP400055030	76	88.261	LOC107776286	XP_016451650.1	-3.757	-2.774	5.381	88.061	2.577	17.714	Polygalacturonase	probable polygalacturonase
Polygalacturonic acid degradation	Polygalacturonases	PGSC0003DMG400016038	PGSC0003DMP400028050	99	92.771	LOC107798036	XP_016476447.1	-3.797	non-DEG	3.789	65.629	7.233	8.433	Polygalacturonase	probable polygalacturonase
Polygalacturonic acid degradation	Polygalacturonases	PGSC0003DMG400021658	PGSC0003DMP400037552	99	93.501	LOC107824442	XP_016506687.1	-4.612	non-EXP	0.309	11.874	non-EXP	non-EXP	Polygalacturonase	probable polygalacturonase isoform X2
Polygalacturonic acid degradation	Polygalacturonases	PGSC0003DMG400021658	PGSC0003DMP400037552	98	93.501	LOC107824442	XP_016506686.1	-4.612	-3.812	0.309	11.874	2.282	32.459	Polygalacturonase	probable polygalacturonase isoform X1
Polygalacturonic acid degradation	Polygalacturonases	PGSC0003DMG400021658	PGSC0003DMP400037552	98	92.872	LOC107777784	XP_016453410.1	-4.612	-3.861	0.309	11.874	3.629	53.358	Polygalacturonase	probable polygalacturonase
Polygalacturonic acid degradation	Polygalacturonases	PGSC0003DMG403031436	PGSC0003DMP400054735	96	88.261	LOC107819519	XP_016501118.1	-4.999	-3.297	0.621	17.616	0.367	3.639	Polygalacturonase	probable polygalacturonase At1g80170
Polygalacturonic acid degradation	Polygalacturonases	PGSC0003DMG403031436	PGSC0003DMP400054735	97	88.043	LOC107813010	XP_016493696.1	-4.999	-4.641	0.621	17.616	0.29	7.287	Polygalacturonase	probable polygalacturonase At1g80170
Polygalacturonic acid degradation	Polygalacturonases	PGSC0003DMG400030978	PGSC0003DMP400053954	96	80.624	LOC107769321	XP_016444012.1	-5.161	-3.463	0.4	16.196	4.46	49.225	Polygalacturonase non-catalytic subunit AroGP2	polygalacturonase-1 non-catalytic subunit beta-like
Polygalacturonic acid degradation	Polygalacturonases	PGSC0003DMG400030981	PGSC0003DMP400053959	99	68.168	LOC107769321	XP_016444012.1	-5.235	-3.463	0.696	15.627	4.46	49.225	Polygalacturonase non-catalytic subunit AroGP3	polygalacturonase-1 non-catalytic subunit beta-like
Polygalacturonic acid degradation	Polygalacturonases	PGSC0003DMG400030979	PGSC0003DMP400053955	99	74.022	LOC107769321	XP_016444012.1	-5.713	-3.463	0.631	32.389	4.46	49.225	Polygalacturonase non-catalytic subunit AroGP3	polygalacturonase-1 non-catalytic subunit beta-like
Polygalacturonic acid degradation	Polygalacturonases	PGSC0003DMG400030980	PGSC0003DMP400053958	95	71.856	LOC107769321	XP_016444012.1	-5.803	-3.463	0.45	25.75	4.46	49.225	Polygalacturonase non-catalytic subunit AroGP3	polygalacturonase-1 non-catalytic subunit beta-like
Polygalacturonic acid degradation	Polygalacturonases	PGSC0003DMG400024599	PGSC0003DMP400042576	79	29.775	LOC107803404	XP_016482604.1	-10.651	-2.115	0	10.93	0.482	2.105	Polygalacturonase-1 non-catalytic subunit beta	polygalacturonase 1 beta-like protein 3
Polygalacturonic acid degradation	Polygalacturonases	PGSC0003DMG400024599	PGSC0003DMP400042576	79	30.337	LOC107815214	XP_016496229.1	-10.651	-2.416	0	10.93	0.876	4.714	Polygalacturonase-1 non-catalytic subunit beta	polygalacturonase 1 beta-like protein 3
Polygalacturonic acid degradation	Polygalacturonases inhibitors	PGSC0003DMG400008492	PGSC0003DMP400014905	91	75.081	LOC107786571	XP_016463555.1	non-DEG	2.639	70.667	55.912	32.513	5.226	Polygalacturonase inhibiting protein	polygalacturonase inhibitor 2-like
Polygalacturonic acid degradation	Polygalacturonases inhibitors	PGSC0003DMG400008492	PGSC0003DMP400014905	93	66.019	LOC107796427	XP_016474670.1	non-DEG	2.007	70.667	55.912	4.011	1.03	Polygalacturonase inhibiting protein	polygalacturonase inhibitor-like
Polygalacturonic acid synthesis	Galacturonosyltarnsferase	PGSC0003DMG400024782	PGSC0003DMP400042955	94	86.119	LOC107811136	XP_016491503.1	non-EXP	-1.624	non-EXP	non-EXP	0.449	1.413	Glycosyltransferase, CAZy family GT8	probable galacturonosyltransferase-like 7
Polygalacturonic acid synthesis	Galacturonosyltarnsferase	PGSC0003DMG400022608	PGSC0003DMP400039179	99	79.592	LOC107814676	XP_016495611.1	non-DEG	2.009	82.734	58.408	10.288	2.596	Transferase, transferring glycosyl groups	probable galacturonosyltransferase-like 9
Polygalacturonic acid synthesis	Galacturonosyltarnsferase	PGSC0003DMG400000010	PGSC0003DMP400000033	100	81.831	LOC107804064	XP_016483370.1	non-DEG	-2.002	12.344	16.08	1.636	6.605	Glycosyltransferase	polygalacturonate 4-alpha-galacturonosyltransferase-like
Polygalacturonic acid synthesis	Galacturonosyltarnsferase	PGSC0003DMG400001396	PGSC0003DMP400002525	99	84.9	LOC107788719	XP_016465906.1	4.318	4.975	113.334	1.984	24.673	0.778	Avr9/Cf-9 rapidly elicited protein 231	probable galacturonosyltransferase-like 10
Polygalacturonic acid synthesis	Galacturonosyltarnsferase	PGSC0003DMG400001396	PGSC0003DMP400002525	100	83.565	LOC107766320	XP_016440568.1	4.318	4.645	113.334	1.984	14.058	0.553	Avr9/Cf-9 rapidly elicited protein 231	probable galacturonosyltransferase-like 10
Polygalacturonic acid synthesis	Galacturonosyltransferase	PGSC0003DMG400001444	PGSC0003DMP400002614	99	90.892	LOC107777394	XP_016452889.1	1.845	non-EXP	56.135	17.895	non-EXP	non-EXP	Isoform 2 of Probable galacturonosyltransferase 13	probable galacturonosyltransferase 14
Polygalacturonic acid synthesis	Galacturonosyltransferase	PGSC0003DMG400001444	PGSC0003DMP400002614	100	88.246	LOC107785217	XP_016461949.1	1.845	1.104	56.135	17.895	21.224	9.968	Isoform 2 of Probable galacturonosyltransferase 13	probable galacturonosyltransferase 13 isoform X1
Polygalacturonic acid synthesis	Galacturonosyltransferase	PGSC0003DMG400014677	PGSC0003DMP400025858	99	90.147	LOC107776423	XP_016451803.1	1.643	non-EXP	15.471	6.726	non-EXP	non-EXP	Glycosyltransferase QUASIMODO1	probable galacturonosyltransferase 3
Polygalacturonic acid synthesis	Galacturonosyltransferase	PGSC0003DMG400024824	PGSC0003DMP400043026	100	95.131	LOC107791445	XP_016469039.1	1.42	-1.222	21.443	11.339	4.163	9.758	Glycosyltransferase, CAZy family GT8	probable galacturonosyltransferase 10
Polygalacturonic acid synthesis	Galacturonosyltransferase	PGSC0003DMG400004427	PGSC0003DMP400007869	99	95.272	LOC107809782	XP_016489958.1	1.264	non-EXP	6.608	3.527	non-EXP	non-EXP	Glycosyltransferase QUASIMODO1	probable galacturonosyltransferase 13 isoform X1
Polygalacturonic acid synthesis	Galacturonosyltransferase	PGSC0003DMG400020103	PGSC0003DMP400034871	97	90.928	LOC107829552	XP_016512487.1	-1.263	-1.388	37.364	109.458	17.435	45.975	Glycosyltransferase QUASIMODO1	galacturonosyltransferase 8-like
Polygalacturonic acid synthesis	Galacturonosyltransferase	PGSC0003DMG400020103	PGSC0003DMP400034871	92	90.421	LOC107806026	XP_016485625.1	-1.263	-1.855	37.364	109.458	12.114	44.132	Glycosyltransferase QUASIMODO1	galacturonosyltransferase 8-like
Polygalacturonic acid synthesis	Galacturonosyltransferase	PGSC0003DMG400027227	PGSC0003DMP400047316	99	89.559	LOC107777433	XP_016452928.1	-1.863	non-EXP	10.138	54.729	non-EXP	non-EXP	Glycosyltransferase, CAZy family GT8	probable galacturonosyltransferase 4 isoform X1
Polygalacturonic acid synthesis	Galacturonosyltransferase	PGSC0003DMG400027227	PGSC0003DMP400047316	99	89.559	LOC107777433	XP_016452927.1	-1.863	-1.269	10.138	54.729	11.832	28.707	Glycosyltransferase, CAZy family GT8	probable galacturonosyltransferase 4 isoform X1
Polygalacturonic acid synthesis	Galacturonosyltransferase	PGSC0003DMG400016880	PGSC0003DMP400029494	100	87.222	LOC107802723	XP_016481760.1	-2.978	-2.333	10.954	131.141	2.172	11.031	Gene of unknown function	probable galacturonosyltransferase-like 1
Polygalacturonic acid synthesis	Galacturonosyltransferase	PGSC0003DMG400016880	PGSC0003DMP400029494	100	85.278	LOC107771849	XP_016446790.1	-2.978	-4.048	10.954	131.141	1.135	18.95	Gene of unknown function	probable galacturonosyltransferase-like 1
Polygalacturonic acid synthesis	Galacturonosyltransferase	PGSC0003DMG400017341	PGSC0003DMP400030305	99	87.203	LOC107793232	XP_016471036.1	-3.176	non-EXP	2.579	42.409	non-EXP	non-EXP	Glycosyltransferase QUASIMODO1	probable galacturonosyltransferase 15 isoform X1
Polygalacturonic acid synthesis	Galacturonosyltransferase	PGSC0003DMG400017341	PGSC0003DMP400030305	99	88.483	LOC107806833	XP_016486573.1	-3.176	-1.551	2.579	42.409	2.666	7.881	Glycosyltransferase QUASIMODO1	probable galacturonosyltransferase 15 isoform X1
Polygalacturonic acid synthesis	Galacturonosyltransferase	PGSC0003DMG400031840	PGSC0003DMP400055118	99	90.935	LOC107771120	XP_016445931.1	-4.544	-2.611	3.936	135.153	1.004	6.162	Glycosyltransferase, CAZy family GT8	probable galacturonosyltransferase-like 7
Polygalacturonic acid synthesis	Galacturonosyltransferase	PGSC0003DMG400031840	PGSC0003DMP400055118	96	90.368	LOC107781212	XP_016457371.1	-4.544	-2.755	3.936	135.153	2.315	15.762	Glycosyltransferase, CAZy family GT8	probable galacturonosyltransferase-like 7
Polygalacturonic acid synthesis	Galacturonosyltransferase	PGSC0003DMG400010088	PGSC0003DMP400017881	99	84.483	LOC107771281	XP_016446109.1	-4.646	non-EXP	0.205	5.371	non-EXP	non-EXP	Glycosyltransferase family GT8 protein	probable galacturonosyltransferase-like 1
Polygalacturonic acid synthesis	Galacturonosyltransferase	PGSC0003DMG400010088	PGSC0003DMP400017881	98	75.61	LOC107815715	XP_016496817.1	-4.646	-6.431	0.205	5.371	0.037	3.785	Glycosyltransferase family GT8 protein	probable galacturonosyltransferase-like 1
Polygalacturonic acid synthesis	Galacturonosyltransferase	PGSC0003DMG400000827	PGSC0003DMP400001574	99	85.47	LOC107788585	XP_016465760.1	-5.658	non-EXP	0.533	39.612	non-EXP	non-EXP	Glycosyltransferase, CAZy family GT8	probable galacturonosyltransferase-like 3 isoform X2
Polygalacturonic acid synthesis	Galacturonosyltransferase	PGSC0003DMG400000827	PGSC0003DMP400001574	100	85.227	LOC107788585	XP_016465753.1	-5.658	-2.032	0.533	39.612	2.18	9	Glycosyltransferase, CAZy family GT8	probable galacturonosyltransferase-like 3 isoform X1
Polygalacturonic acid synthesis	Galacturonosyltransferase	PGSC0003DMG400000827	PGSC0003DMP400001574	89	89.557	LOC107760508	XP_016434049.1	-5.658	-2.607	0.533	39.612	1.672	10.24	Glycosyltransferase, CAZy family GT8	probable galacturonosyltransferase-like 3 isoform X1
Polygalacturonic acid synthesis	Galacturonosyltransferase	PGSC0003DMG400014401	PGSC0003DMP400025360	99	93.809	LOC107807400	XP_016487243.1	-6.259	non-EXP	0.362	70.668	non-EXP	non-EXP	Glycosyltransferase, CAZy family GT8	probable galacturonosyltransferase 12
Polygalacturonic acid synthesis	Galacturonosyltransferase	PGSC0003DMG400014401	PGSC0003DMP400025360	99	93.621	LOC107780375	XP_016456384.1	-6.259	-6.898	0.362	70.668	0.208	25.752	Glycosyltransferase, CAZy family GT8	probable galacturonosyltransferase 12
Polygalacturonic acid synthesis	Galacturonosyltransferase	PGSC0003DMG400019228	PGSC0003DMP400033406	99	93.058	LOC107832564	XP_016515911.1	-6.687	-6.12	0.428	28.242	0.375	26.642	Glycosyltransferase, CAZy family GT8	probable galacturonosyltransferase 12
Polygalacturonic acid synthesis	Galacturonosyltransferase	PGSC0003DMG400001183	PGSC0003DMP400002168	99	93.684	LOC107815715	XP_016496817.1	-12.137	-6.431	0	50.781	0.037	3.785	Glycosyltransferase family GT8 protein	probable galacturonosyltransferase-like 1
Polygalacturonic acid synthesis	Galacturonosyltransferase	PGSC0003DMG400001183	PGSC0003DMP400002168	77	93.333	LOC107797428	XP_016475812.1	-12.137	-10.08	0	50.781	0	4.08	Glycosyltransferase family GT8 protein	probable galacturonosyltransferase-like 1
Polygalacturonic acid synthesis	Methyltransferase	PGSC0003DMG400031473	PGSC0003DMP400054783	100	93.4	LOC107831723	XP_016515005.1	-1.587	-1.53	8.74	40.142	7.463	21.689	S-adenosylmethionine-dependent methyltransferase	probable pectin methyltransferase QUA2
Rhamnogalacturonan degradation	Beta-galactosidases	PGSC0003DMG402009228	PGSC0003DMP400016282	99	78.173	LOC107772517	XP_016447504.1	non-EXP	-4.983	non-EXP	non-EXP	0.058	2.289	Beta-galactosidase	beta-galactosidase 16-like
Rhamnogalacturonan degradation	Beta-galactosidases	PGSC0003DMG401009228	PGSC0003DMP400016279	94	72.492	LOC107805615	XP_016485166.1	non-EXP	-5.62	non-EXP	non-EXP	0.014	0.989	Beta-galactosidase	beta-galactosidase 16-like
Rhamnogalacturonan degradation	Beta-galactosidases	PGSC0003DMG400000339	PGSC0003DMP400000661	92	93.582	LOC107812610	XP_016493241.1	non-DEG	3.119	61.032	195.992	74.198	8.61	Beta-galactosidase	beta-galactosidase-like
Rhamnogalacturonan degradation	Beta-galactosidases	PGSC0003DMG400000339	PGSC0003DMP400000661	92	93.582	LOC107778191	XP_016453890.1	non-DEG	2.823	61.032	195.992	143.207	20.459	Beta-galactosidase	beta-galactosidase-like
Rhamnogalacturonan degradation	Beta-galactosidases	PGSC0003DMG400015211	PGSC0003DMP400026688	99	85.352	LOC107815370	XP_016496424.1	non-DEG	-4.137	4.43	8.2	2.1	36.952	Beta-galactosidase	beta-galactosidase 10-like
Rhamnogalacturonan degradation	Beta-galactosidases	PGSC0003DMG400008109	PGSC0003DMP400014264	94	89.33	LOC107800119	XP_016478752.1	-1.548	-1.583	6.486	24.621	7.275	21.823	Beta-galactosidase	beta-galactosidase 8-like
Rhamnogalacturonan degradation	Beta-galactosidases	PGSC0003DMG400002590	PGSC0003DMP400004621	100	94.768	LOC107779266	XP_016455146.1	-1.632	3.052	65.454	456.928	223.144	27.16	Beta-galactosidase	beta-galactosidase-like
Rhamnogalacturonan degradation	Beta-galactosidases	PGSC0003DMG400002590	PGSC0003DMP400004621	98	95.62	LOC107762980	XP_016436867.1	-1.632	2.649	65.454	456.928	150.819	24.365	Beta-galactosidase	beta-galactosidase-like
Rhamnogalacturonan degradation	Beta-galactosidases	PGSC0003DMG400002590	PGSC0003DMP400004621	99	69.565	LOC107759998	XP_016433505.1	-1.632	-1.697	65.454	456.928	0.242	0.779	Beta-galactosidase	beta-galactosidase-like
Rhamnogalacturonan degradation	Beta-galactosidases	PGSC0003DMG400002590	PGSC0003DMP400004621	99	70.024	LOC107766569	XP_016440858.1	-1.632	-2.517	65.454	456.928	0.121	0.714	Beta-galactosidase	beta-galactosidase-like
Rhamnogalacturonan degradation	Beta-galactosidases	PGSC0003DMG400002590	PGSC0003DMP400004621	100	70.406	LOC107800716	XP_016479426.1	-1.632	-4.211	65.454	456.928	0.109	2.069	Beta-galactosidase	beta-galactosidase-like
Rhamnogalacturonan degradation	Beta-galactosidases	PGSC0003DMG400033646	PGSC0003DMP400056147	97	94.268	LOC107791267	XP_016468781.1	-1.853	-2.123	8.34	31.768	2.21	9.667	Beta-galactosidase	beta-galactosidase
Rhamnogalacturonan degradation	Beta-galactosidases	PGSC0003DMG400026430	PGSC0003DMP400045895	99	90.225	LOC107781818	XP_016458095.1	-2.323	non-DEG	7.562	51.656	9.218	11.494	Beta-galactosidase	beta-galactosidase 9-like isoform X1
Rhamnogalacturonan degradation	Beta-galactosidases	PGSC0003DMG400004842	PGSC0003DMP400008591	99	92.5	LOC107788590	XP_016465757.1	-2.818	non-DEG	0.574	6.037	8.704	20.013	Beta-galactosidase	beta-galactosidase-like
Rhamnogalacturonan degradation	Beta-galactosidases	PGSC0003DMG400004496	PGSC0003DMP400007964	99	86.577	LOC107800716	XP_016479426.1	-4.371	-4.211	0.204	3.198	0.109	2.069	Beta-galactosidase	beta-galactosidase-like
Rhamnogalacturonan degradation	Beta-galactosidases	PGSC0003DMG400030954	PGSC0003DMP400053911	99	93.939	LOC107828285	XP_016511053.1	-4.558	non-DEG	3.608	150.803	41.392	18.089	Beta-galactosidase	beta-galactosidase 3-like
Rhamnogalacturonan degradation	Beta-galactosidases	PGSC0003DMG402009228	PGSC0003DMP400016280	96	77.358	LOC107818278	XP_016499751.1	-5.051	-3.472	0.102	3.487	0.343	3.862	Beta-galactosidase	beta-galactosidase 16-like isoform X1
Rhamnogalacturonan degradation	Beta-galactosidases	PGSC0003DMG402009228	PGSC0003DMP400016280	96	77.649	LOC107760686	XP_016434263.1	-5.051	-5.896	0.102	3.487	0.044	2.755	Beta-galactosidase	beta-galactosidase 16-like
Rhamnogalacturonan degradation	Beta-galactosidases	PGSC0003DMG402009228	PGSC0003DMP400016280	78	87.981	LOC107775343	XP_016450559.1	-5.051	-8.93	0.102	3.487	0	2.81	Beta-galactosidase	beta-galactosidase 6-like
Rhamnogalacturonan degradation	Beta-galactosidases	PGSC0003DMG400022365	PGSC0003DMP400038759	99	90.765	LOC107829017	XP_016511915.1	-6.486	non-EXP	0.064	3.139	non-EXP	non-EXP	Beta-galactosidase	beta-galactosidase 8-like
Rhamnogalacturonan degradation	Beta-galactosidases	PGSC0003DMG400003537	PGSC0003DMP400006312	100	94.083	LOC107795322	XP_016473423.1	-7.46	-2.858	0.589	140.602	4.42	32.2	Beta-galactosidase	beta-galactosidase 3-like
Rhamnogalacturonan degradation	Beta-galactosidases	PGSC0003DMG400003537	PGSC0003DMP400006312	99	94.556	LOC107771930	XP_016446878.1	-7.46	-3.095	0.589	140.602	5.538	47.301	Beta-galactosidase	beta-galactosidase 3-like
Rhamnogalacturonan degradation	Rhamnogalacturonate lyases	PGSC0003DMG401002053	PGSC0003DMP400003671	80	63.383	LOC107814403	XP_016495300.1	non-EXP	-1.962	non-EXP	non-EXP	1.109	4.336	Lyase	rhamnogalacturonate lyase-like isoform X1
Rhamnogalacturonan degradation	Rhamnogalacturonate lyases	PGSC0003DMG401002053	PGSC0003DMP400003671	80	64.126	LOC107790311	XP_016467713.1	non-EXP	-2.258	non-EXP	non-EXP	0.822	3.939	Lyase	rhamnogalacturonate lyase-like isoform X1
Rhamnogalacturonan degradation	Rhamnogalacturonate lyases	PGSC0003DMG400014600	PGSC0003DMP400025711	98	44.5	LOC107823599	XP_016505776.1	non-EXP	-3.455	non-EXP	non-EXP	0.163	1.829	Lyase	uncharacterized protein LOC107823599
Rhamnogalacturonan degradation	Rhamnogalacturonate lyases	PGSC0003DMG401002053	PGSC0003DMP400003671	94	63.148	LOC107831685	XP_016514954.1	non-EXP	-3.889	non-EXP	non-EXP	0.388	5.806	Lyase	probable rhamnogalacturonate lyase B
Rhamnogalacturonan degradation	Rhamnogalacturonate lyases	PGSC0003DMG400015675	PGSC0003DMP400027466	67	72.637	LOC107773856	XP_016448768.1	non-EXP	-4.63	non-EXP	non-EXP	0.031	0.81	Lyase	probable rhamnogalacturonate lyase B
Rhamnogalacturonan degradation	Rhamnogalacturonate lyases	PGSC0003DMG401002053	PGSC0003DMP400003671	85	63.333	LOC107790313	XP_016467717.1	non-EXP	-5.284	non-EXP	non-EXP	0.084	3.434	Lyase	probable rhamnogalacturonate lyase B isoform X1
Rhamnogalacturonan degradation	Rhamnogalacturonate lyases	PGSC0003DMG400014600	PGSC0003DMP400025712	99	71.994	LOC107816998	XP_016498250.1	8.134	13.039	161.99	0.369	15.817	0	Lyase	rhamnogalacturonate lyase-like
Rhamnogalacturonan degradation	Rhamnogalacturonate lyases	PGSC0003DMG400014600	PGSC0003DMP400025712	99	84.581	LOC107760147	XP_016433647.1	8.134	11.47	161.99	0.369	5.261	0	Lyase	rhamnogalacturonate lyase B-like
Rhamnogalacturonan degradation	Rhamnogalacturonate lyases	PGSC0003DMG401002053	PGSC0003DMP400003672	99	89.606	LOC107806431	XP_016486072.1	2.483	non-DEG	22.172	3.593	5.383	1.986	Lyase	probable rhamnogalacturonate lyase B isoform X1
Rhamnogalacturonan degradation	Rhamnogalacturonate lyases	PGSC0003DMG400009330	PGSC0003DMP400016476	99	55.614	LOC107816999	XP_016498251.1	-4.154	-4.28	0.243	6.38	0.078	1.548	Lyase	probable rhamnogalacturonate lyase B
Rhamnogalacturonan degradation	Rhamnogalacturonate lyases	PGSC0003DMG400009330	PGSC0003DMP400016476	77	88.409	LOC107831686	XP_016514955.1	-4.154	-5.466	0.243	6.38	0.144	6.481	Lyase	probable rhamnogalacturonate lyase B
Rhamnogalacturonan degradation	Rhamnogalacturonate lyases	PGSC0003DMG400009330	PGSC0003DMP400016476	99	88.538	LOC107778218	XP_016453916.1	-4.154	-8.666	0.243	6.38	0	0.801	Lyase	probable rhamnogalacturonate lyase B isoform X1
Rhamnogalacturonan degradation	Rhamnogalacturonate lyases	PGSC0003DMG400009330	PGSC0003DMP400016476	99	58.65	LOC107815910	XP_016497048.1	-4.154	-8.958	0.243	6.38	0	1.412	Lyase	probable rhamnogalacturonate lyase B
Rhamnogalacturonan synthesis	Other	PGSC0003DMG400020335	PGSC0003DMP400035316	100	82.523	LOC107818021	XP_016499415.1	non-EXP	2.481	non-EXP	non-EXP	11.437	2.097	Axi 1 protein from Nicotiana tabacum	uncharacterized protein At1g04910-like
Rhamnogalacturonan synthesis	Other	PGSC0003DMG400020335	PGSC0003DMP400035316	100	83.359	LOC107794110	XP_016472059.1	non-EXP	2.307	non-EXP	non-EXP	6.227	1.295	Axi 1 protein from Nicotiana tabacum	uncharacterized protein At1g04910-like
Rhamnogalacturonan synthesis	Other	PGSC0003DMG400029033	PGSC0003DMP400050581	92	89.258	LOC107789359	XP_016466643.1	non-EXP	-1.887	non-EXP	non-EXP	0.675	2.501	Growth regulator	uncharacterized protein At1g04910-like
Rhamnogalacturonan synthesis	Other	PGSC0003DMG400026516	PGSC0003DMP400046065	100	91.912	LOC107828082	XP_016510815.1	non-DEG	-1.296	77.29	80.325	4.11	10.143	Conserved gene of unknown function	uncharacterized protein At1g04910-like
Rhamnogalacturonan synthesis	Other	PGSC0003DMG400004765	PGSC0003DMP400008457	100	84.576	LOC107770415	XP_016445208.1	non-DEG	-1.503	2.23	5.272	4.044	11.527	Conserved gene of unknown function	uncharacterized protein At1g04910-like
Rhamnogalacturonan synthesis	Other	PGSC0003DMG400026516	PGSC0003DMP400046065	100	80.34	LOC107823480	XP_016505607.1	non-DEG	-1.514	77.29	80.325	33.933	97.295	Conserved gene of unknown function	uncharacterized protein At1g04910-like
Rhamnogalacturonan synthesis	Other	PGSC0003DMG400018403	PGSC0003DMP400032060	90	58.939	LOC107763383	XP_016437361.1	non-DEG	-1.71	5.85	11.183	1.846	6.082	Axi 1 protein	uncharacterized protein At1g04910-like
Rhamnogalacturonan synthesis	Other	PGSC0003DMG400025240	PGSC0003DMP400043812	99	91.773	LOC107769352	XP_016444050.1	non-DEG	-2.158	21.247	23.635	1.06	4.741	Axi 1 protein	uncharacterized protein At1g04910-like
Rhamnogalacturonan synthesis	Other	PGSC0003DMG400026516	PGSC0003DMP400046065	100	90.686	LOC107797486	XP_016475872.1	non-DEG	-2.545	77.29	80.325	1.173	6.886	Conserved gene of unknown function	uncharacterized protein At1g04910-like
Rhamnogalacturonan synthesis	Other	PGSC0003DMG400030835	PGSC0003DMP400053713	99	81.321	LOC107828336	XP_016511108.1	non-DEG	-3.456	6.916	9.101	0.13	1.497	Auxin-independent growth promoter	uncharacterized protein At1g04910-like isoform X1
Rhamnogalacturonan synthesis	Other	PGSC0003DMG401021153	PGSC0003DMP400036675	100	88.532	LOC107791119	XP_016468604.1	3.016	2.051	9.798	1.122	8.009	1.964	Protein-O-fucosyltransferase 1	uncharacterized protein LOC107791119
Rhamnogalacturonan synthesis	Other	PGSC0003DMG400016201	PGSC0003DMP400028302	97	80.299	LOC107829223	XP_016512178.1	-4.648	-1.866	11.144	336.881	1.414	5.19	Auxin growth promotor protein	uncharacterized protein At1g04910-like
Rhamnogalacturonan synthesis	Other	PGSC0003DMG400016201	PGSC0003DMP400028302	97	82.8	LOC107816476	XP_016497686.1	-4.648	-1.9	11.144	336.881	0.549	2.064	Auxin growth promotor protein	uncharacterized protein At1g04910-like
Rhamnogalacturonan synthesis	Other	PGSC0003DMG400016201	PGSC0003DMP400028302	99	93.561	LOC107785587	XP_016462413.1	-4.648	-2.169	11.144	336.881	28.747	129.811	Auxin growth promotor protein	uncharacterized protein At1g04910-like isoform X1
Rhamnogalacturonan synthesis	Other	PGSC0003DMG400016201	PGSC0003DMP400028302	99	92.354	LOC107791220	XP_016468723.1	-4.648	-2.681	11.144	336.881	22.776	147.124	Auxin growth promotor protein	uncharacterized protein At1g04910-like isoform X1
Rhamnogalacturonan synthesis	Other	PGSC0003DMG400018658	PGSC0003DMP400032514	99	84.276	LOC107826652	XP_016509139.1	-5.169	-2.508	0.036	3.72	0.494	2.842	Axi 1 protein	uncharacterized protein At1g04910-like
Rhamnogalacturonan synthesis	Other	PGSC0003DMG400028439	PGSC0003DMP400049478	59	92.12	LOC107804424	XP_016483805.1	-7.724	-6.227	0.057	21.352	0.165	12.453	Growth regulator	uncharacterized protein At1g04910-like isoform X1
Rhamnogalacturonan synthesis	RG-I acetylation (TBL10-like)	PGSC0003DMG400023668	PGSC0003DMP400040943	99	61.051	LOC107805357	XP_016484877.1	-2.445	-1.442	0.555	1.317	5.741	15.707	Trichome birefringence	protein trichome birefringence-like
Rhamnogalacturonan synthesis	RG-I acetylation (TBL10-like)	PGSC0003DMG400023668	PGSC0003DMP400040943	100	66.109	LOC107795280	XP_016473375.1	-2.445	-1.663	0.555	1.317	1.583	5.02	Trichome birefringence	protein trichome birefringence-like
Rhamnogalacturonan synthesis	RG-I acetylation (TBL10-like)	PGSC0003DMG400023668	PGSC0003DMP400040943	100	66.295	LOC107791101	XP_016468583.1	-2.445	-2.547	0.555	1.317	3.11	18.144	Trichome birefringence	protein trichome birefringence-like
Rhamnogalacturonan synthesis	RG-I acetylation (TBL10-like)	PGSC0003DMG400013492	PGSC0003DMP400023859	99	73.047	LOC107760117	XP_016433624.1	-4.596	non-DEG	0.332	3.268	1.558	2.574	Lustrin A	protein trichome birefringence-like 2
Rhamnogalacturonan synthesis	RG-I acetylation (TBL10-like)	PGSC0003DMG400008990	PGSC0003DMP400015811	100	89.912	LOC107768722	XP_016443351.1	-6.571	-2.641	0.042	3.078	0.403	2.526	Conserved gene of unknown function	protein trichome birefringence-like 10 isoform X1
Rhamnogalacturonan synthesis	RG-I acetylation (TBL10-like)	PGSC0003DMG400008990	PGSC0003DMP400015811	100	90.591	LOC107811437	XP_016491849.1	-6.571	-2.783	0.042	3.078	0.983	6.821	Conserved gene of unknown function	protein trichome birefringence-like 10
Rhamnogalacturonan synthesis	RG-I rhamnosyltransferase-like	PGSC0003DMG400002367	PGSC0003DMP400004223	98	89.683	LOC107795261	XP_016473343.1	-1.133	-1.044	2.23	6.538	4.746	9.844	Conserved gene of unknown function	uncharacterized protein At1g04910-like
Rhamnogalacturonan synthesis	RG-I side chains (ARAD1-like)	PGSC0003DMG400028213	PGSC0003DMP400049039	99	84.787	LOC107765622	XP_016439772.1	1.295	non-DEG	4.718	0.926	0.467	1.404	Exostosin family protein	probable arabinosyltransferase ARAD1
Rhamnogalacturonan synthesis	RG-I side chains (ARAD1-like)	PGSC0003DMG400028213	PGSC0003DMP400049039	99	82.961	LOC107802493	XP_016481493.1	1.295	-1.401	4.718	0.926	0.918	2.462	Exostosin family protein	probable arabinosyltransferase ARAD1
Rhamnogalacturonan synthesis	RG-I side chains (ARAD1-like)	PGSC0003DMG400019532	PGSC0003DMP400033940	99	84.458	LOC107795132	XP_016473203.1	-1.063	non-DEG	3.061	8.068	3.327	6.487	Conserved gene of unknown function	probable arabinosyltransferase ARAD1
Rhamnogalacturonan synthesis	Rhamnosyltransferases	PGSC0003DMG400016125	PGSC0003DMP400028166	99	56.197	LOC107819461	XP_016501050.1	non-EXP	-2.078	non-EXP	non-EXP	0.25	1.046	UDP-rhamnose:rhamnosyltransferase	putative UDP-rhamnose:rhamnosyltransferase 1
Rhamnogalacturonan synthesis	Rhamnosyltransferases	PGSC0003DMG400024619	PGSC0003DMP400042616	96	89.759	LOC107795261	XP_016473343.1	-2.411	-1.044	3.217	28.986	4.746	9.844	Conserved gene of unknown function	uncharacterized protein At1g04910-like
Rhamnogalacturonan synthesis	Rhamnosyltransferases	PGSC0003DMG400024619	PGSC0003DMP400042616	99	88.732	LOC107788289	XP_016465451.1	-2.411	-1.226	3.217	28.986	4.681	11.046	Conserved gene of unknown function	uncharacterized protein At1g04910-like
Rhamnogalacturonan synthesis	Rhamnosyltransferases	PGSC0003DMG400024619	PGSC0003DMP400042616	96	94.389	LOC107808717	XP_016488745.1	-2.411	-1.243	3.217	28.986	27.383	65.691	Conserved gene of unknown function	uncharacterized protein At1g04910-like
Rhamnogalacturonan synthesis	Rhamnosyltransferases	PGSC0003DMG400024619	PGSC0003DMP400042616	100	95.946	LOC107829991	XP_016512950.1	-2.411	-1.512	3.217	28.986	8.585	24.825	Conserved gene of unknown function	uncharacterized protein At1g04910-like
Rhamnogalacturonan synthesis	Rhamnosyltransferases	PGSC0003DMG400024619	PGSC0003DMP400042616	99	87.525	LOC107796158	XP_016474386.1	-2.411	-1.929	3.217	28.986	2.636	10.108	Conserved gene of unknown function	uncharacterized protein At1g04910-like
Wall proteins	Arabinogalactan proteins	PGSC0003DMG400024162	PGSC0003DMP400041782	95	43.357	LOC107800537	XP_016479214.1	non-EXP	-2.506	non-EXP	non-EXP	15.431	88.132	Methionine rich arabinogalactan	lysine-rich arabinogalactan protein 19-like
Wall proteins	Arabinogalactan proteins	PGSC0003DMG400031864	PGSC0003DMP400055140	100	74.667	LOC107768407	XP_016443020.1	non-EXP	-3.755	non-EXP	non-EXP	0.268	3.666	Classical arabinogalactan protein 26	classical arabinogalactan protein 26-like
Wall proteins	Arabinogalactan proteins	PGSC0003DMG400030819	PGSC0003DMP400053685	100	70.677	LOC107783615	XP_016460086.1	non-DEG	-2.002	182.613	174.73	3.008	12.262	Arabinogalactan-protein	classical arabinogalactan protein 5-like
Wall proteins	Arabinogalactan proteins	PGSC0003DMG400029164	PGSC0003DMP400050778	100	75.301	LOC107764284	XP_016438324.1	non-DEG	-2.663	31.748	73.226	0.925	5.912	Hydroxyproline-rich glycoprotein family protein	classical arabinogalactan protein 1-like
Wall proteins	Arabinogalactan proteins	PGSC0003DMG400002364	PGSC0003DMP400004216	24	77.033	LOC107786890	XP_016463892.1	4.022	non-DEG	6.09	0.47	1.447	0.628	Hydroxyproline-rich glycoprotein (HRGP)	extensin-3-like
Wall proteins	Arabinogalactan proteins	PGSC0003DMG400017758	PGSC0003DMP400031035	99	75.182	LOC107815019	XP_016496013.1	3.912	non-EXP	177.133	17.518	non-EXP	non-EXP	Arabinogalactan-protein	classical arabinogalactan protein 5-like
Wall proteins	Arabinogalactan proteins	PGSC0003DMG400017756	PGSC0003DMP400031033	99	75.912	LOC107815019	XP_016496013.1	2.327	non-EXP	48.709	13.081	non-EXP	non-EXP	Arabinogalactan-protein	classical arabinogalactan protein 5-like
Wall proteins	Arabinogalactan proteins	PGSC0003DMG402016214	PGSC0003DMP400028325	95	45.985	LOC107790227	XP_016467619.1	-1.398	5.629	39.37	131.15	46.393	0.999	Early nodulin 20	classical arabinogalactan protein 4-like
Wall proteins	Arabinogalactan proteins	PGSC0003DMG402016214	PGSC0003DMP400028325	97	32.515	LOC107760090	XP_016433598.1	-1.398	5.084	39.37	131.15	13.759	0.369	Early nodulin 20	classical arabinogalactan protein 4-like
Wall proteins	Arabinogalactan proteins	PGSC0003DMG402016214	PGSC0003DMP400028325	100	68.31	LOC107818118	XP_016499542.1	-1.398	-1.423	39.37	131.15	7.674	20.927	Early nodulin 20	classical arabinogalactan protein 2-like
Wall proteins	Arabinogalactan proteins	PGSC0003DMG400030411	PGSC0003DMP400052929	99	85.849	LOC107762871	XP_016436757.1	-1.943	-2.47	7.006	42.553	1.313	7.316	Fasciclin-like arabinogalactan protein 9	fasciclin-like arabinogalactan protein 4
Wall proteins	Arabinogalactan proteins	PGSC0003DMG400018093	PGSC0003DMP400031527	99	80.378	LOC107759994	XP_016433499.1	-3.079	non-DEG	3.296	44.626	2.532	6.347	Fasciclin-like arabinogalactan protein 9	fasciclin-like arabinogalactan protein 4
Wall proteins	Arabinogalactan proteins	PGSC0003DMG400032211	PGSC0003DMP400055423	98	77.049	LOC107762883	XP_016436771.1	-3.571	non-EXP	13.56	168.712	non-EXP	non-EXP	Conserved gene of unknown function	arabinogalactan peptide 14-like
Wall proteins	Arabinogalactan proteins	PGSC0003DMG400029811	PGSC0003DMP400051939	98	72.963	LOC107821223	XP_016503131.1	-4.274	-2.985	1.046	17.87	0.919	7.305	Fasciclin-like arabinogalactan protein 10	fasciclin-like arabinogalactan protein 1
Wall proteins	Arabinogalactan proteins	PGSC0003DMG400029811	PGSC0003DMP400051939	100	71.685	LOC107829257	XP_016512217.1	-4.274	-3.438	1.046	17.87	0.503	5.493	Fasciclin-like arabinogalactan protein 10	fasciclin-like arabinogalactan protein 1
Wall proteins	Arabinogalactan proteins	PGSC0003DMG400009400	PGSC0003DMP400016620	99	79.447	LOC107784037	XP_016460579.1	-4.447	-2.791	2.19	69.41	11.461	80.01	Fasciclin-like arabinogalactan protein 1	fasciclin-like arabinogalactan protein 9
Wall proteins	Arabinogalactan proteins	PGSC0003DMG400009400	PGSC0003DMP400016620	99	78.226	LOC107830666	XP_016513805.1	-4.447	-3.809	2.19	69.41	2.563	36.416	Fasciclin-like arabinogalactan protein 1	fasciclin-like arabinogalactan protein 9
Wall proteins	Arabinogalactan proteins	PGSC0003DMG400028137	PGSC0003DMP400048888	99	87.746	LOC107832235	XP_016515538.1	-4.713	non-EXP	11.55	311.808	non-EXP	non-EXP	Fasciclin-like arabinogalactan protein 14	fasciclin-like arabinogalactan protein 17
Wall proteins	Arabinogalactan proteins	PGSC0003DMG400028137	PGSC0003DMP400048888	100	82.599	LOC107823842	XP_016506029.1	-4.713	-2.24	11.55	311.808	11.35	54.145	Fasciclin-like arabinogalactan protein 14	fasciclin-like arabinogalactan protein 17
Wall proteins	Arabinogalactan proteins	PGSC0003DMG400028137	PGSC0003DMP400048888	100	81.718	LOC107766400	XP_016440665.1	-4.713	-3.242	11.55	311.808	6.45	61.609	Fasciclin-like arabinogalactan protein 14	fasciclin-like arabinogalactan protein 17
Wall proteins	Arabinogalactan proteins	PGSC0003DMG400028137	PGSC0003DMP400048888	100	84.402	LOC107762220	XP_016436047.1	-4.713	-3.585	11.55	311.808	12.457	150.733	Fasciclin-like arabinogalactan protein 14	fasciclin-like arabinogalactan protein 17 isoform X1
Wall proteins	Arabinogalactan proteins	PGSC0003DMG400021372	PGSC0003DMP400037047	99	81.978	LOC107823842	XP_016506029.1	-4.807	-2.24	3.827	118.477	11.35	54.145	Fasciclin-like arabinogalactan protein 14	fasciclin-like arabinogalactan protein 17
Wall proteins	Arabinogalactan proteins	PGSC0003DMG400006160	PGSC0003DMP400010929	100	87.5	LOC107792706	XP_016470427.1	-6.381	-3.42	1.462	203.543	4.871	52.545	Fasciclin-like arabinogalactan protein 2	fasciclin-like arabinogalactan protein 7
Wall proteins	Arabinogalactan proteins	PGSC0003DMG400006160	PGSC0003DMP400010929	99	88.722	LOC107807962	XP_016487929.1	-6.381	-3.468	1.462	203.543	4.678	52.293	Fasciclin-like arabinogalactan protein 2	fasciclin-like arabinogalactan protein 7
Wall proteins	Arabinogalactan proteins	PGSC0003DMG400014408	PGSC0003DMP400025379	99	87.26	LOC107816302	XP_016497487.1	-7.015	-1.694	0.838	87.395	10.865	35.161	Fasciclin-like arabinogalactan protein 10	fasciclin-like arabinogalactan protein 1
Wall proteins	Arabinogalactan proteins	PGSC0003DMG400014408	PGSC0003DMP400025379	100	87.26	LOC107817819	XP_016499184.1	-7.015	-2.317	0.838	87.395	7.906	39.508	Fasciclin-like arabinogalactan protein 10	fasciclin-like arabinogalactan protein 1
Wall proteins	Arabinogalactan proteins	PGSC0003DMG400008063	PGSC0003DMP400014191	87	87.907	LOC107812975	XP_016493656.1	-7.032	-7.507	1.534	132.153	0.189	34.055	Fasciclin-like AGP 13	fasciclin-like arabinogalactan protein 11
Wall proteins	Arabinogalactan proteins	PGSC0003DMG400008063	PGSC0003DMP400014191	87	87.5	LOC107765203	XP_016439342.1	-7.032	-9.109	1.534	132.153	0.074	44.897	Fasciclin-like AGP 13	fasciclin-like arabinogalactan protein 12
Wall proteins	Arabinogalactan proteins	PGSC0003DMG400025104	PGSC0003DMP400043555	38	92.308	LOC107800037	XP_016478667.1	-7.112	-6.615	0.96	118.617	0.185	18.028	AGP19 (ARABINOGALACTAN-PROTEIN 19)	lysine-rich arabinogalactan protein 19-like
Wall proteins	Arabinogalactan proteins	PGSC0003DMG400025104	PGSC0003DMP400043555	30	91.026	LOC107802135	XP_016481069.1	-7.112	-7.23	0.96	118.617	0.127	18.634	AGP19 (ARABINOGALACTAN-PROTEIN 19)	lysine-rich arabinogalactan protein 19-like
Wall proteins	Arabinogalactan proteins	PGSC0003DMG400024948	PGSC0003DMP400043286	62	76.159	LOC107800806	XP_016479528.1	-7.43	-3.939	2.166	320.581	6.361	97.912	Arabinogalactan protein	lysine-rich arabinogalactan protein 18-like
Wall proteins	Arabinogalactan proteins	PGSC0003DMG400026224	PGSC0003DMP400045517	99	60.839	LOC107818720	XP_016500242.1	-7.723	non-DEG	0.098	56.354	35.465	99.716	Methionine rich arabinogalactan	classical arabinogalactan protein 9-like
Wall proteins	Arabinogalactan proteins	PGSC0003DMG400008124	PGSC0003DMP400014292	71	61.628	LOC107802009	XP_016480929.1	-8.122	-4.151	1.476	86.939	0.233	4.202	Structural constituent of cell wall	classical arabinogalactan protein 4-like
Wall proteins	Arabinogalactan proteins	PGSC0003DMG400017376	PGSC0003DMP400030347	100	87.775	LOC107788180	XP_016465339.1	-8.393	-3.271	0.465	247.072	6.554	63.572	Fasciclin-like arabinogalactan protein 19	fasciclin-like arabinogalactan protein 2
Wall proteins	Arabinogalactan proteins	PGSC0003DMG400017376	PGSC0003DMP400030347	100	86.797	LOC107779390	XP_016455308.1	-8.393	-4.047	0.465	247.072	3.025	50.488	Fasciclin-like arabinogalactan protein 19	fasciclin-like arabinogalactan protein 2
Wall proteins	Arabinogalactan proteins	PGSC0003DMG400028821	PGSC0003DMP400050207	94	77.725	LOC107807962	XP_016487929.1	-8.768	-3.468	0	7.062	4.678	52.293	Fasciclin-like AGP 12	fasciclin-like arabinogalactan protein 7
Wall proteins	Arabinogalactan proteins	PGSC0003DMG400012749	PGSC0003DMP400022582	99	86.288	LOC107799234	XP_016477809.1	-8.771	-3.292	1.018	308.718	4.962	48.857	Fasciclin-like arabinogalactan protein 13	fasciclin-like arabinogalactan protein 8
Wall proteins	Arabinogalactan proteins	PGSC0003DMG400012749	PGSC0003DMP400022582	100	83.267	LOC107806416	XP_016486057.1	-8.771	-3.305	1.018	308.718	5.468	54.516	Fasciclin-like arabinogalactan protein 13	fasciclin-like arabinogalactan protein 8
Wall proteins	Arabinogalactan proteins	PGSC0003DMG400001754	PGSC0003DMP400003139	99	82.879	LOC107770485	XP_016445287.1	-9.077	-8.578	0.351	118.198	0.019	10.372	Arabinogalactan protein 3	fasciclin-like arabinogalactan protein 12
Wall proteins	Arabinogalactan proteins	PGSC0003DMG400001754	PGSC0003DMP400003139	99	83.658	LOC107778315	XP_016454027.1	-9.077	-10.43	0.351	118.198	0	8.248	Arabinogalactan protein 3	fasciclin-like arabinogalactan protein 12
Wall proteins	Arabinogalactan proteins	PGSC0003DMG400025757	PGSC0003DMP400044607	42	56.122	LOC107771591	XP_016446486.1	-9.393	-3.636	0.096	143.107	0.745	9.401	Proline-rich cell wall protein	classical arabinogalactan protein 9-like
Wall proteins	Arabinogalactan proteins	PGSC0003DMG400025757	PGSC0003DMP400044607	10	86.364	LOC107803038	XP_016482121.1	-9.393	-4.149	0.096	143.107	0.956	17.271	Proline-rich cell wall protein	classical arabinogalactan protein 9-like
Wall proteins	Arabinogalactan proteins	PGSC0003DMG400041435	PGSC0003DMP400063539	94	86.726	LOC107770483	XP_016445284.1	-9.557	-8.054	0.816	263.197	0.117	33.186	Arabinogalactan protein	fasciclin-like arabinogalactan protein 12
Wall proteins	Arabinogalactan proteins	PGSC0003DMG400041435	PGSC0003DMP400063539	95	85.022	LOC107778308	XP_016454020.1	-9.557	-12.693	0.816	263.197	0	43.622	Arabinogalactan protein	fasciclin-like arabinogalactan protein 12
Wall proteins	Arabinogalactan proteins	PGSC0003DMG400003371	PGSC0003DMP400006033	99	83.665	LOC107773248	XP_016448178.1	-9.681	non-EXP	1.566	689.203	non-EXP	non-EXP	Arabinogalactan protein 2	fasciclin-like arabinogalactan protein 11
Wall proteins	Arabinogalactan proteins	PGSC0003DMG400003371	PGSC0003DMP400006033	100	81.673	LOC107798848	XP_016477368.1	-9.681	-7.17	1.566	689.203	0.061	10.235	Arabinogalactan protein 2	fasciclin-like arabinogalactan protein 11
Wall proteins	Arabinogalactan proteins	PGSC0003DMG400029700	PGSC0003DMP400051734	64	89.024	LOC107762179	XP_016435997.1	-11.675	-3.107	0.035	176.367	7.158	61.703	Proline-rich protein 1	non-classical arabinogalactan protein 31-like
Wall proteins	BURP	PGSC0003DMG400025192	PGSC0003DMP400043741	99	79.135	LOC107766981	XP_016441387.1	non-DEG	-1.526	6.911	34.602	12.791	37.125	Dehydration-responsive protein RD22	BURP domain protein USPL1-like
Wall proteins	BURP	PGSC0003DMG400025192	PGSC0003DMP400043741	99	78.626	LOC107772076	XP_016447052.1	non-DEG	-2.008	6.911	34.602	24.383	98.486	Dehydration-responsive protein RD22	BURP domain protein USPL1-like
Wall proteins	BURP	PGSC0003DMG400019937	PGSC0003DMP400034606	100	75	LOC107780309	XP_016456323.1	7.582	6.024	60.386	0.25	758.158	11.732	Dehydration-responsive protein RD22	BURP domain-containing protein 5-like
Wall proteins	BURP	PGSC0003DMG400019937	PGSC0003DMP400034606	90	75.988	LOC107824245	XP_016506479.1	7.582	3.291	60.386	0.25	176.559	18.114	Dehydration-responsive protein RD22	BURP domain-containing protein 5-like
Wall proteins	BURP	PGSC0003DMG400025193	PGSC0003DMP400043742	99	80.09	LOC107766981	XP_016441387.1	-2.416	-1.526	12.622	52.288	12.791	37.125	Dehydration-responsive protein RD22	BURP domain protein USPL1-like
Wall proteins	BURP	PGSC0003DMG400047074	PGSC0003DMP400069178	95	48.378	LOC107824245	XP_016506479.1	-3.171	3.291	21.802	396.385	176.559	18.114	BURP domain-containing protein	BURP domain-containing protein 5-like
Wall proteins	BURP	PGSC0003DMG400014509	PGSC0003DMP400025570	100	79.188	LOC107796869	XP_016475182.1	-4.017	-3.657	4.535	74.423	7.92	99.585	BURP domain-containing protein	BURP domain protein RD22-like isoform X1
Wall proteins	BURP	PGSC0003DMG400014509	PGSC0003DMP400025570	100	80.307	LOC107816355	XP_016497544.1	-4.017	-3.801	4.535	74.423	2.779	38.966	BURP domain-containing protein	BURP domain protein RD22-like
Wall proteins	BURP	PGSC0003DMG400025191	PGSC0003DMP400043740	99	79.928	LOC107765166	XP_016439264.1	-9.268	-1.285	0.077	8.557	11.335	27.899	Dehydration-responsive protein RD22	BURP domain protein USPL1-like
Wall proteins	BURP	PGSC0003DMG400025191	PGSC0003DMP400043740	99	81.72	LOC107805585	XP_016485139.1	-9.268	-1.728	0.077	8.557	11.301	37.941	Dehydration-responsive protein RD22	BURP domain protein USPL1-like
Wall proteins	Chitinases	PGSC0003DMG400026854	PGSC0003DMP400046623	100	74.85	LOC107780391	XP_016456406.1	non-EXP	8.767	non-EXP	non-EXP	354.537	0.867	Endochitinase 2	endochitinase 3-like
Wall proteins	Chitinases	PGSC0003DMG400003191	PGSC0003DMP400005764	89	39.267	LOC107786713	XP_016463715.1	non-EXP	8.735	non-EXP	non-EXP	26.802	0.041	Receptor-like kinase CHRK1	chitinase-3-like protein 2
Wall proteins	Chitinases	PGSC0003DMG400026854	PGSC0003DMP400046623	100	74.925	LOC107784434	XP_016461053.1	non-EXP	5.611	non-EXP	non-EXP	152.843	3.205	Endochitinase 2	endochitinase 3
Wall proteins	Chitinases	PGSC0003DMG400026854	PGSC0003DMP400046623	100	86.364	LOC107759005	XP_016432348.1	non-EXP	5.609	non-EXP	non-EXP	1147.82	23.789	Endochitinase 2	endochitinase A
Wall proteins	Chitinases	PGSC0003DMG400003191	PGSC0003DMP400005764	91	38.053	LOC107789337	XP_016466609.1	non-EXP	4.822	non-EXP	non-EXP	55.728	1.957	Receptor-like kinase CHRK1	chitotriosidase-1-like
Wall proteins	Chitinases	PGSC0003DMG400026854	PGSC0003DMP400046623	100	88.308	LOC107826794	XP_016509308.1	non-EXP	3.532	non-EXP	non-EXP	1363.82	119.106	Endochitinase 2	endochitinase B
Wall proteins	Chitinases	PGSC0003DMG400006591	PGSC0003DMP400011648	98	87.197	LOC107829934	XP_016512893.1	non-EXP	3.181	non-EXP	non-EXP	3.933	0.434	Class III chitinase	hevamine-A-like
Wall proteins	Chitinases	PGSC0003DMG400011836	PGSC0003DMP400020988	58	41.667	LOC107814956	XP_016495946.1	non-EXP	2.832	non-EXP	non-EXP	4	0.559	Chitinase	chitinase-3-like protein 2
Wall proteins	Chitinases	PGSC0003DMG400003191	PGSC0003DMP400005764	51	77.101	LOC107811781	XP_016492257.1	non-EXP	2.258	non-EXP	non-EXP	4.04	0.87	Receptor-like kinase CHRK1	chitotriosidase-1-like
Wall proteins	Chitinases	PGSC0003DMG400006591	PGSC0003DMP400011648	98	87.197	LOC107821994	XP_016503976.1	non-EXP	2.16	non-EXP	non-EXP	9.551	2.165	Class III chitinase	hevamine-A-like
Wall proteins	Chitinases	PGSC0003DMG400026854	PGSC0003DMP400046623	98	68.627	LOC107763561	XP_016437534.1	non-EXP	-5.013	non-EXP	non-EXP	0.156	5.486	Endochitinase 2	endochitinase 3-like
Wall proteins	Chitinases	PGSC0003DMG400001529	PGSC0003DMP400002758	99	79.921	LOC107771200	XP_016446027.1	non-DEG	4.042	2.939	0.718	1480.98	90.746	Acidic 27 kDa endochitinase	acidic endochitinase P
Wall proteins	Chitinases	PGSC0003DMG400015523	PGSC0003DMP400027201	76	89.216	LOC107781300	XP_016457473.1	non-DEG	3.683	2.527	4.21	5.112	0.436	Chitinase 1	chitinase 1-like
Wall proteins	Chitinases	PGSC0003DMG400015523	PGSC0003DMP400027201	99	86.184	LOC107801492	XP_016480309.1	non-DEG	3.154	2.527	4.21	12.293	1.402	Chitinase 1	chitinase 2-like
Wall proteins	Chitinases	PGSC0003DMG400008673	PGSC0003DMP400015232	100	91.558	LOC107790992	XP_016468458.1	non-DEG	2.614	58.862	68.337	173.323	28.703	Endochitinase (Chitinase)	basic endochitinase-like
Wall proteins	Chitinases	PGSC0003DMG400001528	PGSC0003DMP400002757	99	75.294	LOC107771200	XP_016446027.1	6.132	4.042	1541.35	15.38	1480.98	90.746	Class II chitinase	acidic endochitinase P
Wall proteins	Chitinases	PGSC0003DMG400025063	PGSC0003DMP400043485	99	83.513	LOC107800989	XP_016479741.1	5.847	9.511	519.832	5.637	114.502	0.17	Class IV chitinase	endochitinase EP3-like
Wall proteins	Chitinases	PGSC0003DMG400025063	PGSC0003DMP400043485	99	73.646	LOC107760646	XP_016434218.1	5.847	-2.003	519.832	5.637	1.575	6.425	Class IV chitinase	chitinase 6-like
Wall proteins	Chitinases	PGSC0003DMG400037480	PGSC0003DMP400059584	61	42.063	LOC107793288	XP_016471103.1	5.816	3.811	7.162	0.112	117.494	8.363	Receptor-like kinase CHRK1	acidic mammalian chitinase-like
Wall proteins	Chitinases	PGSC0003DMG400026855	PGSC0003DMP400046624	99	87.988	LOC107826794	XP_016509308.1	5.308	3.532	6163.4	258.399	1363.82	119.106	Endochitinase 4	endochitinase B
Wall proteins	Chitinases	PGSC0003DMG400011842	PGSC0003DMP400021005	94	85.915	LOC107779287	XP_016455167.1	4.757	4.91	237.236	14.8	25.199	0.869	Chitinase	chitinase-3-like protein 1
Wall proteins	Chitinases	PGSC0003DMG400011842	PGSC0003DMP400021005	91	41.595	LOC107812074	XP_016492594.1	4.757	4.298	237.236	14.8	993.555	51.001	Chitinase	chitotriosidase-1-like
Wall proteins	Chitinases	PGSC0003DMG400011842	PGSC0003DMP400021005	92	42.09	LOC107790755	XP_016468204.1	4.757	4.077	237.236	14.8	266.791	15.912	Chitinase	chitotriosidase-1-like
Wall proteins	Chitinases	PGSC0003DMG400011842	PGSC0003DMP400021005	94	87.606	LOC107812827	XP_016493482.1	4.757	1.484	237.236	14.8	19.692	7.029	Chitinase	acidic mammalian chitinase-like
Wall proteins	Chitinases	PGSC0003DMG400008796	PGSC0003DMP400015454	93	79.734	LOC107826794	XP_016509308.1	4.297	3.532	565.438	48.757	1363.82	119.106	Basic 30 kDa endochitinase	endochitinase B
Wall proteins	Chitinases	PGSC0003DMG400026853	PGSC0003DMP400046622	88	79.787	LOC107826794	XP_016509308.1	4.125	3.532	706.043	70.698	1363.82	119.106	Endochitinase 3	endochitinase B
Wall proteins	Chitinases	PGSC0003DMG400008797	PGSC0003DMP400015455	99	72.759	LOC107826794	XP_016509308.1	1.24	3.532	228.396	149.011	1363.82	119.106	Endochitinase	endochitinase B
Wall proteins	Chitinases	PGSC0003DMG400033882	PGSC0003DMP400056271	99	87.241	LOC107825584	XP_016507940.1	-2.303	-1.43	16.53	108.899	10.262	27.881	Acidic endochitinase	acidic endochitinase
Wall proteins	Chitinases	PGSC0003DMG400033882	PGSC0003DMP400056271	93	65.328	LOC107807601	XP_016487507.1	-2.303	-2.215	16.53	108.899	6.209	28.904	Acidic endochitinase	basic endochitinase isoform X1
Wall proteins	Chitinases	PGSC0003DMG400033882	PGSC0003DMP400056271	90	89.205	LOC107804142	XP_016483455.1	-2.303	-2.762	16.53	108.899	0.369	2.642	Acidic endochitinase	acidic endochitinase-like
Wall proteins	Chitinases	PGSC0003DMG400004593	PGSC0003DMP400008119	97	92.114	LOC107784282	XP_016460873.1	-3.917	-3.778	0.685	13.203	1.363	18.901	Chitinase	chitinase-like protein 2
Wall proteins	Chitinases	PGSC0003DMG400004593	PGSC0003DMP400008119	97	93.06	LOC107818928	XP_016500498.1	-3.917	-4.172	0.685	13.203	0.414	7.616	Chitinase	chitinase-like protein 2
Wall proteins	Chitinases	PGSC0003DMG400021602	PGSC0003DMP400037450	100	89.231	LOC107797098	XP_016475448.1	-4.26	-4.216	94.26	2756.32	33.41	624.356	Chitinase	chitinase-like protein 1
Wall proteins	Chitinases	PGSC0003DMG400021602	PGSC0003DMP400037450	94	92.459	LOC107816748	XP_016497971.1	-4.26	-4.544	94.26	2756.32	5.332	124.88	Chitinase	chitinase-like protein 1
Wall proteins	Chitinases	PGSC0003DMG400016302	PGSC0003DMP400028482	99	71.93	LOC107760646	XP_016434218.1	-4.511	-2.003	0.27	6.775	1.575	6.425	Class IV chitinase	chitinase 6-like
Wall proteins	Chitinases	PGSC0003DMG402001531	PGSC0003DMP400002766	99	88.168	LOC107822201	XP_016504206.1	-7.644	non-DEG	1.121	111.128	6.926	4.469	Chitinase 134	basic endochitinase-like
Wall proteins	Expansins	PGSC0003DMG400026022	PGSC0003DMP400045146	99	86.716	LOC107760651	XP_016434223.1	non-EXP	6.535	non-EXP	non-EXP	5.907	0.045	Beta expansin 1	putative expansin-B2
Wall proteins	Expansins	PGSC0003DMG400021682	PGSC0003DMP400037598	96	84.436	LOC107802824	XP_016481888.1	non-EXP	-4.286	non-EXP	non-EXP	0.296	5.845	Beta-expansin 3	expansin-B3-like
Wall proteins	Expansins	PGSC0003DMG400020497	PGSC0003DMP400035606	92	87.747	LOC107794363	XP_016472333.1	8.49	12.999	250.945	0.497	449.247	0.075	Major pollen allergen Ory s 1	expansin-like B1
Wall proteins	Expansins	PGSC0003DMG400020497	PGSC0003DMP400035606	99	88.142	LOC107781933	XP_016458239.1	8.49	11.809	250.945	0.497	340.407	0.113	Major pollen allergen Ory s 1	expansin-like B1
Wall proteins	Expansins	PGSC0003DMG400026222	PGSC0003DMP400045515	99	84.861	LOC107832483	XP_016515821.1	8.402	non-DEG	503.85	2.462	624.509	56.624	Major pollen allergen Ory s 1	expansin-like B1
Wall proteins	Expansins	PGSC0003DMG400022732	PGSC0003DMP400039412	99	88.571	LOC107818619	XP_016500148.1	7.339	non-EXP	3.54	0	non-EXP	non-EXP	Alpha-expansin 7	expansin-A7-like
Wall proteins	Expansins	PGSC0003DMG400026220	PGSC0003DMP400045512	99	86.561	LOC107790386	XP_016467794.1	3.003	non-DEG	73.184	5.985	74.484	6.124	Major pollen allergen Ory s 1	expansin-like B1
Wall proteins	Expansins	PGSC0003DMG400026220	PGSC0003DMP400045512	99	85.433	LOC107831803	XP_016515083.1	3.003	5.584	73.184	5.985	148.451	3.19	Major pollen allergen Ory s 1	expansin-like B1
Wall proteins	Expansins	PGSC0003DMG400001848	PGSC0003DMP400003309	100	89.412	LOC107823695	XP_016505873.1	2.817	2.855	7.287	0.827	17.773	2.527	Major pollen allergen Ory s 1	expansin-like B1
Wall proteins	Expansins	PGSC0003DMG400001848	PGSC0003DMP400003309	100	92.157	LOC107779922	XP_016455911.1	2.817	2.008	7.287	0.827	16.816	4.272	Major pollen allergen Ory s 1	expansin-like B1
Wall proteins	Expansins	PGSC0003DMG400018635	PGSC0003DMP400032465	95	86.29	LOC107801681	XP_016480531.1	-1.269	non-DEG	67.738	165.01	18.198	19.106	Expansin	expansin-like A2
Wall proteins	Expansins	PGSC0003DMG400018635	PGSC0003DMP400032465	90	76.687	LOC107821371	XP_016503295.1	-1.269	-1.253	67.738	165.01	5.781	13.954	Expansin	expansin-like A1
Wall proteins	Expansins	PGSC0003DMG400016715	PGSC0003DMP400029232	99	91.76	LOC107773912	XP_016448830.1	-3.403	-1.9	2.198	21.493	2.026	7.617	Expansin	expansin-A13-like
Wall proteins	Expansins	PGSC0003DMG400008833	PGSC0003DMP400015511	99	92.692	LOC107812998	XP_016493682.1	-3.763	-3.542	3.142	50.716	1.796	20.973	Expansin	expansin-A3-like
Wall proteins	Expansins	PGSC0003DMG400024062	PGSC0003DMP400041627	99	83.577	LOC107810643	XP_016490918.1	-3.822	non-DEG	1.669	13.949	1.189	3.114	Expansin	expansin-A13-like
Wall proteins	Expansins	PGSC0003DMG400018431	PGSC0003DMP400032109	99	96.787	LOC107808676	XP_016488701.1	-4.015	non-DEG	0.764	9.779	11.715	28.257	Alpha-expansin 1	expansin-A1-like
Wall proteins	Expansins	PGSC0003DMG400001426	PGSC0003DMP400002572	99	91.25	LOC107804813	XP_016484237.1	-4.183	non-DEG	1.188	22.438	20.873	75.078	Expansin	expansin-A10-like
Wall proteins	Expansins	PGSC0003DMG400001426	PGSC0003DMP400002572	100	90.417	LOC107787480	XP_016464549.1	-4.183	-2.312	1.188	22.438	14.165	69.993	Expansin	expansin-A10-like
Wall proteins	Expansins	PGSC0003DMG400023815	PGSC0003DMP400041197	99	91.188	LOC107808265	XP_016488258.1	-4.394	non-DEG	3.226	83.259	7.393	14.568	Expansin	expansin-A4-like
Wall proteins	Expansins	PGSC0003DMG400018312	PGSC0003DMP400031910	99	91.386	LOC107815943	XP_016497079.1	-8.024	non-DEG	0.043	14.878	1.535	3.122	Beta-expansin 3	expansin-B3-like
Wall proteins	Expansins	PGSC0003DMG400016650	PGSC0003DMP400029123	99	81.781	LOC107804642	XP_016484048.1	-8.278	non-EXP	0.131	21.326	non-EXP	non-EXP	Expansin	expansin-A10-like
Wall proteins	Expansins	PGSC0003DMG400030415	PGSC0003DMP400052934	99	86.538	LOC107816945	XP_016498182.1	-9.022	non-DEG	0.122	31.793	1.79	13.133	Expansin18	expansin-A6-like
Wall proteins	Expansins	PGSC0003DMG400030415	PGSC0003DMP400052934	100	88.123	LOC107802488	XP_016481487.1	-9.022	-2.25	0.122	31.793	1.79	8.691	Expansin18	expansin-A6-like
Wall proteins	Expansins	PGSC0003DMG400004404	PGSC0003DMP400007815	99	89.615	LOC107816945	XP_016498182.1	-10.013	non-DEG	0.209	115.75	1.79	13.133	Expansin9	expansin-A6-like
Wall proteins	Expansins	PGSC0003DMG400004404	PGSC0003DMP400007815	100	89.231	LOC107818570	XP_016500095.1	-10.013	-2.478	0.209	115.75	13.173	73.318	Expansin9	expansin-A6-like
Wall proteins	Expansins	PGSC0003DMG400018844	PGSC0003DMP400032846	97	78.341	LOC107760991	XP_016434629.1	-10.093	non-EXP	0	22.476	non-EXP	non-EXP	Beta expansin 2	expansin-B15-like
Wall proteins	Extensins	PGSC0003DMG400007684	PGSC0003DMP400013579	100	81.818	LOC107832384	XP_016515711.1	non-EXP	4.553	non-EXP	non-EXP	1.286	0.075	Serine-threonine protein kinase, plant-type	leucine-rich repeat extensin-like protein 6
Wall proteins	Extensins	PGSC0003DMG401032203	PGSC0003DMP400055407	99	59.783	LOC107786099	XP_016463020.1	non-EXP	2.443	non-EXP	non-EXP	25.484	4.841	Extensin	mulatexin-like
Wall proteins	Extensins	PGSC0003DMG400000386	PGSC0003DMP400000762	61	87.629	LOC107822178	XP_016504173.1	non-EXP	-1.725	non-EXP	non-EXP	7.497	24.998	Leucine-rich repeat extensin 3	leucine-rich repeat extensin-like protein 4
Wall proteins	Extensins	PGSC0003DMG400009657	PGSC0003DMP400017057	28	72.5	LOC107830764	XP_016513891.1	non-EXP	-3.93	non-EXP	non-EXP	0.275	4.245	Conserved gene of unknown function	leucine-rich repeat extensin-like protein 3
Wall proteins	Extensins	PGSC0003DMG400013142	PGSC0003DMP400023262	100	84.249	LOC107826716	XP_016509218.1	non-DEG	1.85	17.148	28.763	20.816	5.85	Hydroxyproline-rich glycoprotein family protein	pollen-specific leucine-rich repeat extensin-like protein 2
Wall proteins	Extensins	PGSC0003DMG400005783	PGSC0003DMP400010255	99	70.711	LOC107778437	XP_016454179.1	8.288	6.825	116.773	0.369	44.039	0.385	Plant cell wall protein SlTFR88	uncharacterized protein LOC107778437
Wall proteins	Extensins	PGSC0003DMG400002456	PGSC0003DMP400004343	99	68.447	LOC107776177	XP_016451512.1	7.459	5.498	654.18	3.841	39.064	0.911	Cysteine-rich extensin-2	uncharacterized protein LOC107776177
Wall proteins	Extensins	PGSC0003DMG400000783	PGSC0003DMP400001497	86	52.941	LOC107800248	XP_016478884.1	4.155	5.187	738.019	63.368	64.72	1.847	Extensin	extensin-2-like
Wall proteins	Extensins	PGSC0003DMG400000783	PGSC0003DMP400001497	89	80.913	LOC107787803	XP_016464892.1	4.155	5.117	738.019	63.368	65.374	1.874	Extensin	extensin-3-like
Wall proteins	Extensins	PGSC0003DMG400000783	PGSC0003DMP400001497	84	51.351	LOC107781455	XP_016457640.1	4.155	2.278	738.019	63.368	18.332	3.825	Extensin	extensin-2-like
Wall proteins	Extensins	PGSC0003DMG400000776	PGSC0003DMP400001489	99	42.018	LOC107788221	XP_016465382.1	3.888	non-EXP	310.841	35.694	non-EXP	non-EXP	Extensin (ext)	extensin-3-like
Wall proteins	Extensins	PGSC0003DMG400000777	PGSC0003DMP400001490	97	41.988	LOC107788221	XP_016465382.1	2.799	non-EXP	4.178	1.787	non-EXP	non-EXP	Histidine-rich glycoprotein	extensin-3-like
Wall proteins	Extensins	PGSC0003DMG400000777	PGSC0003DMP400001490	86	68.444	LOC107826255	XP_016508708.1	2.799	3.185	4.178	1.787	539.166	59.81	Histidine-rich glycoprotein	extensin-3-like isoform X1
Wall proteins	Extensins	PGSC0003DMG400000777	PGSC0003DMP400001490	83	64.179	LOC107787804	XP_016464894.1	2.799	1.581	4.178	1.787	342.022	115.31	Histidine-rich glycoprotein	extensin-1-like
Wall proteins	Extensins	PGSC0003DMG400000777	PGSC0003DMP400001490	87	70.861	LOC107768502	XP_016443115.1	2.799	1.003	4.178	1.787	311.266	156.83	Histidine-rich glycoprotein	extensin-1-like
Wall proteins	Extensins	PGSC0003DMG400021603	PGSC0003DMP400037451	16	91.429	LOC107759023	XP_016432368.1	2.202	non-DEG	427.824	133.136	138.114	81.379	Hydroxyproline-rich glycoprotein (HRGP)	extensin-2-like
Wall proteins	Extensins	PGSC0003DMG400000063	PGSC0003DMP400000153	99	79.227	LOC107761994	XP_016435780.1	1.824	non-DEG	129.034	37.942	137.499	112.28	Heavy metal-associated domain containing protein	pollen-specific leucine-rich repeat extensin-like protein 1
Wall proteins	Extensins	PGSC0003DMG400015010	PGSC0003DMP400026400	99	73.852	LOC107772138	XP_016447112.1	1.783	non-DEG	486.829	205.401	18.992	14.457	Proline-rich protein	pollen-specific leucine-rich repeat extensin-like protein 1
Wall proteins	Extensins	PGSC0003DMG400015010	PGSC0003DMP400026400	100	51.227	LOC107794784	XP_016472798.1	1.783	-2.101	486.829	205.401	10.749	46.496	Proline-rich protein	pollen-specific leucine-rich repeat extensin-like protein 1
Wall proteins	Extensins	PGSC0003DMG400015010	PGSC0003DMP400026400	100	56.271	LOC107792700	XP_016470420.1	1.783	-3.316	486.829	205.401	5.631	56.412	Proline-rich protein	pollen-specific leucine-rich repeat extensin-like protein 1
Wall proteins	Extensins	PGSC0003DMG400026790	PGSC0003DMP400046535	99	78.889	LOC107822365	XP_016504384.1	1.369	non-DEG	16.406	6.114	15.075	13.474	Conserved gene of unknown function	pollen-specific leucine-rich repeat extensin-like protein 1
Wall proteins	Extensins	PGSC0003DMG400030541	PGSC0003DMP400053159	92	83.206	LOC107800479	XP_016479141.1	1.186	1.121	213.979	110.058	74.652	34.846	Nutrient reservoir	leucine-rich repeat extensin-like protein 6
Wall proteins	Extensins	PGSC0003DMG400001072	PGSC0003DMP400002002	72	86.732	LOC107815983	XP_016497116.1	-1.378	-1.503	33.953	94.355	11.033	31.543	Leucine-rich repeat extensin 3	leucine-rich repeat extensin-like protein 3
Wall proteins	Extensins	PGSC0003DMG400001072	PGSC0003DMP400002002	56	87.105	LOC107822178	XP_016504173.1	-1.378	-1.725	33.953	94.355	7.497	24.998	Leucine-rich repeat extensin 3	leucine-rich repeat extensin-like protein 4
Wall proteins	Extensins	PGSC0003DMG400006243	PGSC0003DMP400011064	100	77.225	LOC107790409	XP_016467819.1	-1.649	-1.903	2.069	11.764	0.885	3.335	OJ1116_C07.8 protein	extensin-like isoform X1
Wall proteins	Extensins	PGSC0003DMG400008441	PGSC0003DMP400014815	99	55.352	LOC107772138	XP_016447112.1	-2.124	non-DEG	13.702	61.73	18.992	14.457	Proline-rich protein	pollen-specific leucine-rich repeat extensin-like protein 1
Wall proteins	Extensins	PGSC0003DMG400006027	PGSC0003DMP400010700	92	80.042	LOC107829315	XP_016512273.1	-2.383	-1.491	3.668	29.22	6.394	18.064	Leucine-rich repeat/extensin	leucine-rich repeat extensin-like protein 2
Wall proteins	Extensins	PGSC0003DMG400006027	PGSC0003DMP400010700	66	79.296	LOC107812724	XP_016493366.1	-2.383	-1.638	3.668	29.22	6.832	21.372	Leucine-rich repeat/extensin	leucine-rich repeat extensin-like protein 4
Wall proteins	Extensins	PGSC0003DMG400024151	PGSC0003DMP400041760	97	56.573	LOC107775760	XP_016451019.1	-3.797	-2.042	0.125	1.719	1.293	5.347	Hydroxyproline-rich glycoprotein family protein	uncharacterized protein LOC107775760
Wall proteins	Extensins	PGSC0003DMG400016899	PGSC0003DMP400029532	96	77.722	LOC107784529	XP_016461162.1	-4.387	-1.548	1.072	23.416	1.326	3.913	Leucine-rich repeat family protein / extensin family protein	leucine-rich repeat extensin-like protein 6
Wall proteins	Extensins	PGSC0003DMG400016899	PGSC0003DMP400029532	89	83.621	LOC107812641	XP_016493272.1	-4.387	-1.842	1.072	23.416	0.392	1.451	Leucine-rich repeat family protein / extensin family protein	leucine-rich repeat extensin-like protein 4
Wall proteins	Extensins	PGSC0003DMG400020204	PGSC0003DMP400035078	96	87.135	LOC107828040	XP_016510773.1	-4.907	non-EXP	1.357	76.542	non-EXP	non-EXP	Hydrolase, acting on ester bonds	uncharacterized protein LOC107828040
Wall proteins	Extensins	PGSC0003DMG400020204	PGSC0003DMP400035078	93	87.273	LOC107809892	XP_016490075.1	-4.907	-1.834	1.357	76.542	6.956	24.897	Hydrolase, acting on ester bonds	uncharacterized protein LOC107809892
Wall proteins	Extensins	PGSC0003DMG400019410	PGSC0003DMP400033719	32	87.324	LOC107782891	XP_016459316.1	-5.142	non-DEG	0.207	11.632	5.181	7.466	Heavy metal-associated domain containing protein	pollen-specific leucine-rich repeat extensin-like protein 1
Wall proteins	Extensins	PGSC0003DMG400007374	PGSC0003DMP400013054	22	71	LOC107799870	XP_016478493.1	-6.134	-2.636	1.27	127.342	2.957	18.504	Extensin	predicted GPI-anchored protein 58
Wall proteins	Extensins	PGSC0003DMG400013274	PGSC0003DMP400023476	97	83.108	LOC107777845	XP_016453480.1	-6.665	-5.912	0.189	15.53	0.637	39.514	Conserved gene of unknown function	uncharacterized protein LOC107777845
Wall proteins	Extensins	PGSC0003DMG400032828	PGSC0003DMP400055735	100	91.705	LOC107794501	XP_016472485.1	-10.233	-5.11	0.161	157.795	0.091	3.208	Serine-threonine protein kinase, plant-type	leucine-rich repeat extensin-like protein 4
Wall proteins	Extensins	PGSC0003DMG400032828	PGSC0003DMP400055735	99	81.102	LOC107818130	XP_016499558.1	-10.233	-5.581	0.161	157.795	0.118	6.093	Serine-threonine protein kinase, plant-type	leucine-rich repeat extensin-like protein 4
Wall proteins	Extensins	PGSC0003DMG400032828	PGSC0003DMP400055735	100	88.052	LOC107758946	XP_016432279.1	-10.233	-7.907	0.161	157.795	0	0.876	Serine-threonine protein kinase, plant-type	leucine-rich repeat extensin-like protein 4
Wall proteins	Extensins	PGSC0003DMG400032828	PGSC0003DMP400055735	99	82.322	LOC107767780	XP_016442356.1	-10.233	-10.323	0.161	157.795	0	4.71	Serine-threonine protein kinase, plant-type	leucine-rich repeat extensin-like protein 4
Wall proteins	Glycine rich	PGSC0003DMG400023374	PGSC0003DMP400040422	18	75	LOC107778305	XP_016454017.1	non-EXP	4.64	non-EXP	non-EXP	3.898	0.114	Glycine-rich cell wall structural protein 1	putative glycine-rich cell wall structural protein 1
Wall proteins	Glycine rich	PGSC0003DMG400017550	PGSC0003DMP400030651	19	79.545	LOC107785096	XP_016461807.1	non-EXP	-1.979	non-EXP	non-EXP	0.916	3.653	Glycine-rich protein TomR2	glycine-rich cell wall structural protein 1.8-like
Wall proteins	Glycine rich	PGSC0003DMG400031529	PGSC0003DMP400054871	51	62.319	LOC107818395	XP_016499883.1	non-EXP	-3.046	non-EXP	non-EXP	0.488	4.3	Glycine-rich protein	glycine-rich cell wall structural protein-like isoform X1
Wall proteins	Glycine rich	PGSC0003DMG400011230	PGSC0003DMP400019870	22	93.333	LOC107819148	XP_016500721.1	non-EXP	-3.469	non-EXP	non-EXP	1.338	14.828	Glycine-rich protein	glycine-rich cell wall structural protein 2-like
Wall proteins	Glycine rich	PGSC0003DMG400011230	PGSC0003DMP400019870	43	81.034	LOC107760441	XP_016433972.1	non-EXP	-3.472	non-EXP	non-EXP	1.046	12.074	Glycine-rich protein	putative glycine-rich cell wall structural protein 1
Wall proteins	Glycine rich	PGSC0003DMG400002108	PGSC0003DMP400003780	7	96.552	LOC107816805	XP_016498038.1	non-DEG	-5.223	6.159	37.213	4.548	172.277	Glycine-rich protein TomR2	glycine-rich cell wall structural protein 1.8-like
Wall proteins	Glycine rich	PGSC0003DMG400018610	PGSC0003DMP400032424	100	54.217	LOC107791174	XP_016468674.1	-2.638	-5.167	172.132	951.014	3.841	139.836	Elicitor resposible protein	glycine-rich cell wall structural protein-like
Wall proteins	Glycine rich	PGSC0003DMG400018610	PGSC0003DMP400032424	100	54.268	LOC107783164	XP_016459625.1	-2.638	-7.923	172.132	951.014	0.353	88.796	Elicitor resposible protein	glycine-rich cell wall structural protein-like
Wall proteins	Other cell wall proteins	PGSC0003DMG400002880	PGSC0003DMP400005194	100	72.857	LOC107788809	XP_016466020.1	non-EXP	-2.051	non-EXP	non-EXP	4.479	18.69	Proline-rich protein	repetitive proline-rich cell wall protein 1-like
Wall proteins	Other cell wall proteins	PGSC0003DMG400001380	PGSC0003DMP400002485	64	91.473	LOC107802007	XP_016480928.1	non-DEG	-1.704	6.215	10.72	10.889	35.808	Pollen Ole e 1 allergen and extensin	vegetative cell wall protein gp1-like
Wall proteins	Other cell wall proteins	PGSC0003DMG401009709	PGSC0003DMP400017143	100	88.978	LOC107773919	XP_016448836.1	-1.274	-2.048	22.707	81.086	13.15	54.834	O-acetyltransferase	protein REDUCED WALL ACETYLATION 3-like
Wall proteins	Other cell wall proteins	PGSC0003DMG401009709	PGSC0003DMP400017143	100	95.018	LOC107783485	XP_016459946.1	-1.274	-2.614	22.707	81.086	6.422	39.522	O-acetyltransferase	protein REDUCED WALL ACETYLATION 3-like isoform X1
Wall proteins	Other cell wall proteins	PGSC0003DMG400004616	PGSC0003DMP400008168	100	74.157	LOC107796123	XP_016474343.1	-2.337	-3.797	3.39	36.874	0.989	14.119	Invertase inhibitor	cell wall / vacuolar inhibitor of fructosidase 1-like
Wall proteins	Other cell wall proteins	PGSC0003DMG400005375	PGSC0003DMP400009512	77	61.644	LOC107797249	XP_016475608.1	-2.548	-2.125	0.114	1.59	0.47	2.064	Oxidoreductase	cell wall protein DAN4-like
Wall proteins	Other cell wall proteins	PGSC0003DMG400004617	PGSC0003DMP400008170	100	83.626	LOC107775540	XP_016450774.1	-5.485	-2.613	0.512	13.973	12.088	74.619	Invertase inhibitor	cell wall / vacuolar inhibitor of fructosidase 1-like
Wall proteins	Other cell wall proteins	PGSC0003DMG400008124	PGSC0003DMP400014292	98	62.304	LOC107796385	XP_016474625.1	-8.122	-5.182	1.476	86.939	0.312	11.462	Structural constituent of cell wall	vegetative cell wall protein gp1-like
Wall proteins	Other proteins	PGSC0003DMG400028901	PGSC0003DMP400050354	99	67.699	LOC107819525	XP_016501128.1	4.006	non-EXP	31.712	3.541	non-EXP	non-EXP	Proline-rich cell wall protein	uncharacterized protein LOC107819525
Wall proteins	Other proteins	PGSC0003DMG400001631	PGSC0003DMP400002953	35	85.99	LOC107792693	XP_016470414.1	-3.604	-1.644	0.309	3.12	9.062	28.278	Proline-rich protein	proline-rich protein 4-like
Wall proteins	Other proteins	PGSC0003DMG400012234	PGSC0003DMP400021645	99	75	LOC107823286	XP_016505400.1	-10.92	-5.061	0.122	21.504	0.454	15.332	Conserved gene of unknown function	protein BRANCHLESS TRICHOME-like
Wall proteins	Trichome birefringence	PGSC0003DMG400013492	PGSC0003DMP400023860	100	76.555	LOC107781950	XP_016458253.1	non-EXP	-1.484	non-EXP	non-EXP	0.839	2.353	Lustrin A	protein trichome birefringence-like 2 isoform X1
Wall proteins	Trichome birefringence	PGSC0003DMG400028639	PGSC0003DMP400049895	98	85.507	LOC107766780	XP_016441112.1	non-EXP	-1.63	non-EXP	non-EXP	0.789	2.493	Conserved gene of unknown function	protein trichome birefringence-like 41
Wall proteins	Trichome birefringence	PGSC0003DMG400018971	PGSC0003DMP400033023	99	58.081	LOC107806526	XP_016486179.1	non-EXP	-1.697	non-EXP	non-EXP	0.181	0.587	Lustrin A	protein trichome birefringence-like
Wall proteins	Trichome birefringence	PGSC0003DMG400026457	PGSC0003DMP400045948	70	87.251	LOC107828428	XP_016511213.1	non-EXP	-1.924	non-EXP	non-EXP	0.302	1.158	Conserved gene of unknown function	protein trichome birefringence-like 42
Wall proteins	Trichome birefringence	PGSC0003DMG400028639	PGSC0003DMP400049895	96	87.202	LOC107824888	XP_016507181.1	non-EXP	-2.574	non-EXP	non-EXP	0.688	4.105	Conserved gene of unknown function	protein trichome birefringence-like 41 isoform X1
Wall proteins	Trichome birefringence	PGSC0003DMG400026457	PGSC0003DMP400045948	70	89.641	LOC107788730	XP_016465920.1	non-EXP	-4.341	non-EXP	non-EXP	0.066	1.497	Conserved gene of unknown function	protein trichome birefringence-like 42
Wall proteins	Trichome birefringence	PGSC0003DMG400017290	PGSC0003DMP400030203	74	89.381	LOC107794700	XP_016472704.1	non-EXP	-5.326	non-EXP	non-EXP	0.056	2.207	Conserved gene of unknown function	protein trichome birefringence-like 43
Wall proteins	Trichome birefringence	PGSC0003DMG400045331	PGSC0003DMP400067435	68	72.449	LOC107782132	XP_016458460.1	non-EXP	-10.218	non-EXP	non-EXP	0	3.722	Conserved gene of unknown function	protein trichome birefringence-like 31
Wall proteins	Trichome birefringence	PGSC0003DMG400045331	PGSC0003DMP400067435	69	71.918	LOC107820984	XP_016502846.1	non-EXP	-10.9	non-EXP	non-EXP	0	6.121	Conserved gene of unknown function	protein trichome birefringence-like 31
Wall proteins	Trichome birefringence	PGSC0003DMG400001197	PGSC0003DMP400002184	97	79.956	LOC107829896	XP_016512854.1	non-DEG	1.627	3.9	5.532	4.252	1.411	Conserved gene of unknown function	protein trichome birefringence-like 11
Wall proteins	Trichome birefringence	PGSC0003DMG400010097	PGSC0003DMP400017897	100	85.48	LOC107788275	XP_016465435.1	non-DEG	-1.341	20.392	14.302	1.148	2.932	Conserved gene of unknown function	protein trichome birefringence-like 19
Wall proteins	Trichome birefringence	PGSC0003DMG400028732	PGSC0003DMP400050050	100	90.889	LOC107760855	XP_016434448.1	non-DEG	-1.36	1.307	2.558	1.118	2.884	Conserved gene of unknown function	protein trichome birefringence-like 14
Wall proteins	Trichome birefringence	PGSC0003DMG400011446	PGSC0003DMP400020276	99	79.237	LOC107805357	XP_016484877.1	non-DEG	-1.442	11.723	13.986	5.741	15.707	Trichome birefringence	protein trichome birefringence-like
Wall proteins	Trichome birefringence	PGSC0003DMG400024805	PGSC0003DMP400042985	100	85.308	LOC107793619	XP_016471497.1	non-DEG	-1.524	2.667	5.245	2.818	8.166	Conserved gene of unknown function	protein trichome berefringence-like 7
Wall proteins	Trichome birefringence	PGSC0003DMG400012299	PGSC0003DMP400021768	99	87.413	LOC107782563	XP_016458931.1	non-DEG	-1.611	12.884	12.439	4.445	13.696	Conserved gene of unknown function	protein trichome birefringence-like 23
Wall proteins	Trichome birefringence	PGSC0003DMG400011446	PGSC0003DMP400020276	99	76.471	LOC107767433	XP_016441928.1	non-DEG	-2.132	11.723	13.986	4.293	18.938	Trichome birefringence	protein trichome birefringence-like
Wall proteins	Trichome birefringence	PGSC0003DMG400012299	PGSC0003DMP400021768	86	87.535	LOC107799078	XP_016477636.1	non-DEG	-2.232	12.884	12.439	2.794	13.199	Conserved gene of unknown function	protein trichome birefringence-like 23
Wall proteins	Trichome birefringence	PGSC0003DMG400028732	PGSC0003DMP400050050	100	91.54	LOC107804442	XP_016483822.1	non-DEG	-2.504	1.307	2.558	0.552	3.153	Conserved gene of unknown function	protein trichome birefringence-like 14
Wall proteins	Trichome birefringence	PGSC0003DMG400010097	PGSC0003DMP400017897	100	82.944	LOC107829486	XP_016512419.1	non-DEG	-3.036	20.392	14.302	0.508	4.197	Conserved gene of unknown function	protein trichome birefringence-like 19
Wall proteins	Trichome birefringence	PGSC0003DMG400020431	PGSC0003DMP400035490	100	77.904	LOC107793539	XP_016471407.1	non-DEG	-3.111	22.832	4.587	0.759	6.588	Conserved gene of unknown function	protein trichome birefringence-like 39
Wall proteins	Trichome birefringence	PGSC0003DMG400020431	PGSC0003DMP400035490	100	77.198	LOC107797195	XP_016475543.1	non-DEG	-5.175	22.832	4.587	0.388	14.164	Conserved gene of unknown function	protein trichome birefringence-like 39
Wall proteins	Trichome birefringence-like	PGSC0003DMG400003117	PGSC0003DMP400005623	99	92.273	LOC107824181	XP_016506411.1	-1.167	non-DEG	6.274	19.094	1.19	1.693	Conserved gene of unknown function	protein trichome birefringence-like 12
Wall proteins	Trichome birefringence-like	PGSC0003DMG400007093	PGSC0003DMP400012583	99	85.792	LOC107790501	XP_016467910.1	-1.363	non-DEG	2.769	7.065	3.837	6.234	Conserved gene of unknown function	protein trichome birefringence-like 41
Wall proteins	Trichome birefringence-like	PGSC0003DMG400005107	PGSC0003DMP400009078	99	89.435	LOC107768380	XP_016442990.1	-1.731	non-DEG	1.445	6.874	1.065	2.169	Conserved gene of unknown function	protein trichome birefringence-like 13 isoform X1
Wall proteins	Trichome birefringence-like	PGSC0003DMG400005107	PGSC0003DMP400009078	100	89.681	LOC107799208	XP_016477778.1	-1.731	-1.529	1.445	6.874	0.73	2.131	Conserved gene of unknown function	protein trichome birefringence-like 13 isoform X1
Wall proteins	Trichome birefringence-like	PGSC0003DMG400010227	PGSC0003DMP400018078	99	88.472	LOC107806033	XP_016485633.1	-1.971	2.525	2.722	19.487	56.804	9.941	Alpha galactosidase	protein trichome birefringence-like 37
Wall proteins	Trichome birefringence-like	PGSC0003DMG400010227	PGSC0003DMP400018078	93	59.437	LOC107790500	XP_016467907.1	-1.971	-7.694	2.722	19.487	0.113	24.935	Alpha galactosidase	protein trichome birefringence-like 41 isoform X1
Wall proteins	Trichome birefringence-like	PGSC0003DMG400010227	PGSC0003DMP400018078	93	59.207	LOC107826962	XP_016509494.1	-1.971	-8.331	2.722	19.487	0.044	14.224	Alpha galactosidase	protein trichome birefringence-like 41
Wall proteins	Trichome birefringence-like	PGSC0003DMG402000097	PGSC0003DMP400000221	99	78.523	LOC107820097	XP_016501797.1	-3.922	-1.542	1.105	12.851	3.367	9.818	Conserved gene of unknown function	protein trichome birefringence-like 25
Wall proteins	Trichome birefringence-like	PGSC0003DMG402000097	PGSC0003DMP400000221	97	56.842	LOC107764985	XP_016439043.1	-3.922	-2.045	1.105	12.851	1.532	6.393	Conserved gene of unknown function	protein trichome birefringence-like 25
Wall proteins	Trichome birefringence-like	PGSC0003DMG402000097	PGSC0003DMP400000221	91	77.725	LOC107798515	XP_016477005.1	-3.922	-3.384	1.105	12.851	0.933	9.843	Conserved gene of unknown function	protein trichome birefringence-like 26
Wall proteins	Trichome birefringence-like	PGSC0003DMG400026554	PGSC0003DMP400046145	100	84.211	LOC107798800	XP_016477324.1	-4.72	-1.567	1.547	24.465	1.682	4.995	Conserved gene of unknown function	protein trichome birefringence-like 19
Wall proteins	Trichome birefringence-like	PGSC0003DMG400026554	PGSC0003DMP400046145	99	85.88	LOC107794370	XP_016472338.1	-4.72	-1.926	1.547	24.465	0.884	3.368	Conserved gene of unknown function	protein trichome birefringence-like 19
Wall proteins	Trichome birefringence-like	PGSC0003DMG400010096	PGSC0003DMP400017896	99	83.803	LOC107829486	XP_016512419.1	-5.764	-3.036	0.703	24.915	0.508	4.197	Conserved gene of unknown function	protein trichome birefringence-like 19
Wall proteins	Trichome birefringence-like	PGSC0003DMG400010095	PGSC0003DMP400017895	100	74.661	LOC107788276	XP_016465436.1	-6.003	-2.435	0.45	20.268	3.165	17.131	Conserved gene of unknown function	protein trichome birefringence-like 19
Wall proteins	Trichome birefringence-like	PGSC0003DMG400010095	PGSC0003DMP400017895	98	77.412	LOC107829487	XP_016512420.1	-6.003	-3.806	0.45	20.268	0.203	2.937	Conserved gene of unknown function	protein trichome birefringence-like 19
Wall proteins	Trichome birefringence-like	PGSC0003DMG400023990	PGSC0003DMP400041470	97	95.304	LOC107830584	XP_016513683.1	-7.353	-3.37	0.643	94.829	9.823	100.911	Conserved gene of unknown function	protein trichome birefringence-like 36
Wall proteins	Trichome birefringence-like	PGSC0003DMG400023990	PGSC0003DMP400041470	99	93.404	LOC107805204	XP_016484682.1	-7.353	-3.838	0.643	94.829	6.675	95.043	Conserved gene of unknown function	protein trichome birefringence-like 36
Wall proteins	Trichome birefringence-like	PGSC0003DMG400004387	PGSC0003DMP400007789	99	77.534	LOC107806033	XP_016485633.1	-8.93	2.525	0.291	4.604	56.804	9.941	Alpha galactosidase	protein trichome birefringence-like 37
